# Supplementary material
Source: publisher figshare collection journal article supplement (https://wiley.figshare.com/ndownloader/files/33570659)
Supplement: Supplementary file 1 [file 33570659]

Time	Al	Ak	Af	Ap	Ar	Ag	Ab
0	0	0	0	0	0	0	0
0.061287028	0.039064132	0.038799796	0.142145707	0.90931671	0.340075814	0.002734352	0.000157238
0.122574055	0.081693774	0.062247739	0.339288677	2.086103709	0.780272473	0.006289287	0.000375423
0.183861083	0.119049878	0.082450787	0.548743812	3.243382425	1.213317867	0.009803218	0.000607367
0.24514811	0.15340311	0.1019136	0.768532824	4.370552777	1.635283355	0.013242505	0.00085089
0.306435138	0.185948219	0.120823177	0.998142341	5.467037593	2.045980585	0.016603661	0.001105431
0.367722165	0.217230773	0.139206159	1.237225436	6.533347621	2.445621411	0.019886606	0.001370612
0.429009193	0.247502647	0.157080014	1.485474947	7.570196827	2.834487993	0.023092007	0.001646101
0.490296221	0.27688499	0.174459245	1.742604699	8.578368249	3.212883434	0.026220869	0.001931587
0.551583248	0.305444862	0.191359076	2.008340583	9.558651403	3.581109081	0.029274336	0.002226773
0.612870276	0.33322477	0.207792752	2.282418977	10.5118324	3.939461481	0.03225365	0.002531374
0.674157303	0.360254447	0.223773277	2.564584839	11.4386825	4.288228629	0.035160114	0.002845112
0.735444331	0.386558088	0.239313682	2.854590656	12.33995241	4.627688277	0.037995057	0.003167719
0.796731359	0.412157861	0.254426678	3.15219608	13.21637177	4.958108156	0.040759837	0.003498935
0.858018386	0.437074963	0.269124479	3.457167711	14.06864998	5.279746751	0.043455824	0.003838507
0.919305414	0.461329504	0.28341888	3.769278868	14.89747683	5.592853876	0.046084401	0.004186189
0.980592441	0.484940722	0.297321428	4.088308856	15.70352371	5.89767199	0.048646947	0.004541741
1.041879469	0.507926778	0.310843281	4.414043752	16.48744185	6.194434496	0.051144854	0.004904931
1.103166496	0.530304564	0.323995102	4.746277182	17.24986035	6.483363923	0.053579543	0.005275537
1.164453524	0.552092149	0.336787713	5.084804981	17.99139874	6.764683479	0.055952353	0.005653335
1.225740552	0.573305253	0.349231214	5.429432524	18.71264986	7.038601305	0.058264695	0.006038116
1.287027579	0.593958633	0.361335322	5.77997188	19.4141865	7.305316583	0.060517992	0.006429674
1.348314607	0.614069631	0.373110058	6.136233822	20.09658145	7.565036228	0.06271352	0.006827805
1.409601634	0.63365214	0.384564595	6.498041445	20.76037325	7.817946455	0.06485268	0.007232317
1.470888662	0.652720257	0.395707948	6.865221778	21.40608741	8.064230253	0.066936828	0.007643022
1.532175689	0.671289127	0.406549166	7.237601391	22.03424938	8.304075863	0.068967219	0.008059731
1.593462717	0.689371955	0.417096706	7.615017953	22.64535178	8.537653977	0.070945182	0.008482269
1.654749745	0.706982002	0.427358874	7.997312042	23.23987779	8.765133725	0.072872001	0.008910462
1.716036772	0.724132347	0.437343887	8.384325478	23.81830685	8.986684928	0.074748905	0.009344138
1.7773238	0.740835403	0.44705952	8.775908877	24.38109113	9.20246546	0.076577144	0.009783135
1.838610827	0.757103297	0.456513393	9.171915641	24.92867426	9.412631062	0.078357932	0.010227295
1.899897855	0.772947905	0.465713025	9.572201247	25.46149368	9.617335893	0.080092452	0.010676459
1.961184883	0.788380542	0.474665536	9.976628535	25.9799639	9.81672539	0.08178188	0.011130479
2.02247191	0.803412368	0.483377938	10.38506249	26.48449289	10.01094316	0.083427364	0.011589208
2.083758938	0.81805447	0.491857143	10.79737009	26.97548262	10.2001311	0.085030022	0.012052502
2.145045965	0.832317175	0.500109671	11.21342558	27.45331245	10.38442276	0.086590962	0.012520223
2.206332993	0.846210595	0.508141883	11.63310635	27.91835226	10.56394862	0.088111266	0.012992239
2.26762002	0.859744507	0.515959926	12.05629373	28.37095956	10.7388349	0.089591995	0.01346842
2.328907048	0.872929281	0.523570148	12.48286536	28.81150376	10.90921314	0.091034169	0.013948633
2.390194076	0.885773918	0.530978229	12.91271145	29.24031505	11.07520007	0.092438807	0.014432759
2.451481103	0.898287495	0.53818982	13.34572283	29.65772194	11.23691233	0.0938069	0.014920679
2.512768131	0.910478796	0.545210377	13.78179394	30.06404178	11.39446285	0.095139413	0.015412277
2.574055158	0.922356712	0.552045419	14.22081822	30.45959534	11.54796614	0.096437288	0.015907439
2.635342186	0.93392973	0.5587002	14.66269408	30.84468806	11.69753143	0.097701444	0.016406053
2.696629213	0.94520592	0.565179703	15.107325	31.21960961	11.84326247	0.09893278	0.016908014
2.757916241	0.956193243	0.571488834	15.55461596	31.58464519	11.9852617	0.100132169	0.017413219
2.819203269	0.966899473	0.577632385	16.00447421	31.94007324	12.12362924	0.101300467	0.017921567
2.880490296	0.977332227	0.583615071	16.45680847	32.28616776	12.25846348	0.102438516	0.018432957
2.941777324	0.98749885	0.589441384	16.91153167	32.62318983	12.38985901	0.103547122	0.018947296
3.003064351	0.997406532	0.595115734	17.36855834	32.95139562	12.51790862	0.104627073	0.019464489
3.064351379	1.007062286	0.600642414	17.82780527	33.27103461	12.64270292	0.10567914	0.019984447
3.125638407	1.016472778	0.606025493	18.28919347	33.58234315	12.76432721	0.106704091	0.020507083
3.186925434	1.025644694	0.611269049	18.75264387	33.88555822	12.88286804	0.107702652	0.02103231
3.248212462	1.034584493	0.616377016	19.21808016	34.18090829	12.99840875	0.108675537	0.021560046
3.309499489	1.043298469	0.621353219	19.6854281	34.46861562	13.11103058	0.109623443	0.022090209
3.370786517	1.051792662	0.626201318	20.15461663	34.74889269	13.22081128	0.110547051	0.022622722
3.432073544	1.060072966	0.630924877	20.6255765	35.02194657	13.32782677	0.111447026	0.023157509
3.493360572	1.068145196	0.635527414	21.09823945	35.28798145	13.43215206	0.112324011	0.023694495
3.5546476	1.076014974	0.640012316	21.57253965	35.5471942	13.5338596	0.113178635	0.024233608
3.615934627	1.083687761	0.644382874	22.0484132	35.79977577	13.63301979	0.114011508	0.024774779
3.677221655	1.091168829	0.64864226	22.52579843	36.04591037	13.72970095	0.114823225	0.02531794
3.738508682	1.098463367	0.652793588	23.00463485	36.28577878	13.82396984	0.115614367	0.025863025
3.79979571	1.105576404	0.65683987	23.48486392	36.51955589	13.91589134	0.116385497	0.026409969
3.861082737	1.112512831	0.660784033	23.96642874	36.74741166	14.00552856	0.117137167	0.026958711
3.922369765	1.119277418	0.664628916	24.4492741	36.96951081	14.09294322	0.117869903	0.02750919
3.983656793	1.125874796	0.668377284	24.93334627	37.1860139	14.17819509	0.118584227	0.028061346
4.04494382	1.132309477	0.672031824	25.41859301	37.39707689	14.26134241	0.119280646	0.028615124
4.106230848	1.138585855	0.67559515	25.90496354	37.60285145	14.34244194	0.119959652	0.029170466
4.167517875	1.144708208	0.679069803	26.39240846	37.80348514	14.42154896	0.120621722	0.029727319
4.228804903	1.150680705	0.682458258	26.8808797	37.99912156	14.49871732	0.121267323	0.03028563
4.290091931	1.156507408	0.685762924	27.37033045	38.18990058	14.57399953	0.12189691	0.030845347
4.351378958	1.16219226	0.688986136	27.86071539	38.37595758	14.64744654	0.122510921	0.031406421
4.412665986	1.167738536	0.692129652	28.35199942	38.55739447	14.71910046	0.123109745	0.031968813
4.473953013	1.17315031	0.695195983	28.84413436	38.734357	14.78901408	0.123693822	0.03253247
4.535240041	1.178431205	0.698187258	29.33707881	38.90696881	14.85723421	0.124263557	0.033097347
4.596527068	1.183584757	0.701105557	29.83079239	39.07535059	14.92380655	0.124819344	0.033663398
4.657814096	1.188614422	0.703952915	30.32523565	39.23962031	14.98877575	0.125361567	0.034230581
4.719101124	1.193523577	0.70673132	30.82037004	39.39989338	15.05218546	0.1258906	0.034798853
4.780388151	1.198315526	0.70944272	31.31615779	39.55628291	15.11407838	0.126406807	0.035368173
4.841675179	1.202993509	0.71208903	31.8125619	39.70889992	15.17449637	0.126910547	0.035938499
4.902962206	1.207560699	0.714672129	32.30954604	39.85785352	15.23348046	0.127402167	0.036509791
4.964249234	1.212020215	0.717193867	32.8070745	40.00325112	15.29107092	0.127882008	0.03708201
5.025536261	1.216375121	0.719656071	33.3051121	40.14519866	15.34730736	0.128350403	0.037655118
5.086823289	1.220628433	0.722060543	33.80362414	40.28380082	15.40222875	0.128807678	0.038229076
5.148110317	1.224783124	0.724409067	34.30257635	40.41916122	15.45587348	0.129254155	0.038803845
5.209397344	1.228840251	0.726701803	34.80196354	40.55128813	15.50825548	0.129690024	0.03937942
5.270684372	1.232802915	0.728940681	35.30174898	40.68029376	15.55941476	0.130115608	0.039955761
5.331971399	1.236674247	0.731127675	35.80189525	40.80629292	15.60939173	0.130531228	0.040532825
5.393258427	1.240456784	0.733264265	36.30237385	40.92937136	15.65821915	0.130937161	0.041110581
5.454545455	1.244153001	0.735351894	36.80315693	41.04961289	15.70592905	0.131333679	0.041688998
5.515832482	1.24776532	0.737391976	37.3042173	41.16709945	15.75255273	0.131721049	0.042268047
5.57711951	1.25129611	0.739385894	37.80552838	41.28191123	15.79812079	0.13209953	0.042847697
5.638406537	1.254747691	0.741335003	38.30706416	41.39412674	15.8426632	0.132469376	0.04342792
5.699693565	1.25812232	0.74324062	38.80879933	41.50382244	15.88620916	0.132830833	0.044008687
5.760980592	1.261420827	0.74510296	39.31072854	41.61101072	15.92876986	0.133184025	0.044589992
5.82226762	1.264646134	0.746923876	39.81281696	41.71579903	15.97038278	0.133529252	0.045171796
5.883554648	1.267800229	0.748704506	40.31504272	41.81825331	16.01107368	0.133866737	0.045754075
5.944841675	1.270885048	0.750445952	40.8173846	41.91843749	16.0508676	0.134196692	0.046336805
6.006128703	1.27390247	0.752149283	41.31982207	42.01641354	16.08978886	0.134519328	0.046919964
6.06741573	1.276854323	0.753815536	41.82233522	42.11224154	16.12786113	0.134834847	0.047503528
6.128702758	1.279742383	0.755445716	42.32490473	42.20597974	16.16510742	0.135143448	0.048087476
6.189989785	1.282568378	0.757040796	42.82751193	42.29768459	16.20155009	0.135445323	0.048671788
6.251276813	1.285333954	0.758601738	43.3301385	42.38741187	16.23721044	0.13574065	0.049256442
6.312563841	1.288040656	0.7601295	43.83276641	42.47521741	16.27210837	0.136029577	0.049841419
6.373850868	1.290690126	0.761624944	44.33537891	42.56115103	16.30626522	0.136312304	0.050426698
6.435137896	1.293283894	0.76308894	44.83795941	42.64526311	16.3397008	0.136589001	0.051012263
6.496424923	1.29582345	0.76452233	45.34049182	42.7276026	16.37243438	0.136859833	0.051598093
6.557711951	1.298310239	0.765925935	45.84296051	42.80821704	16.40448471	0.13712496	0.052184173
6.618998979	1.30074567	0.767300551	46.3453503	42.88715265	16.43587001	0.137384538	0.052770484
6.680286006	1.303131112	0.768646952	46.84764644	42.96445441	16.466608	0.137638719	0.05335701
6.741573034	1.305467896	0.769965893	47.34983461	43.04016605	16.49671593	0.137887653	0.053943734
6.802860061	1.307757362	0.77125816	47.85190029	43.11433272	16.52621115	0.13813147	0.05453064
6.864147089	1.310000796	0.772524495	48.35382963	43.18699718	16.55511027	0.138370306	0.055117713
6.925434116	1.31219941	0.773765572	48.85560965	43.25819886	16.58342904	0.138604304	0.055704936
6.986721144	1.314354416	0.774982085	49.35722732	43.32797785	16.61118312	0.138833596	0.056292297
7.048008172	1.316466998	0.77617471	49.85866993	43.39637342	16.63838784	0.13905831	0.056879779
7.109295199	1.318538313	0.777344113	50.35992503	43.46342405	16.66505818	0.139278572	0.05746737
7.170582227	1.320569495	0.778490947	50.86098042	43.52916752	16.69120882	0.139494503	0.058055053
7.231869254	1.322561653	0.779615852	51.36182415	43.59364092	16.71685411	0.139706224	0.058642818
7.293156282	1.324515876	0.780719461	51.86244446	43.65688079	16.74200816	0.139913852	0.059230648
7.354443309	1.326432872	0.781802061	52.36283569	43.71890453	16.76668017	0.140117471	0.059818538
7.415730337	1.328313782	0.782864351	52.86298498	43.77975239	16.79088491	0.140317202	0.060406474
7.477017365	1.330159655	0.78390695	53.3628809	43.83946007	16.81463593	0.140513155	0.060994441
7.538304392	1.331971453	0.784930407	53.86251326	43.89805952	16.8379457	0.140705434	0.061582428
7.59959142	1.333750124	0.785935265	54.36187209	43.95558208	16.86082646	0.14089414	0.062170424
7.660878447	1.335496593	0.786922052	54.86094758	44.01205853	16.88329021	0.141079373	0.062758416
7.722165475	1.337211771	0.787891291	55.35973014	44.06751914	16.90534872	0.14126123	0.063346395
7.783452503	1.338896553	0.788843496	55.85821034	44.12199373	16.92701357	0.141439806	0.063934349
7.84473953	1.340551763	0.789779133	56.35637962	44.17550935	16.94829545	0.14161519	0.064522267
7.906026558	1.342177657	0.790698263	56.85423705	44.22806903	16.96919778	0.141787426	0.065110149
7.967313585	1.34377542	0.791601614	57.35176918	44.27971543	16.9897358	0.141956632	0.065697979
8.028600613	1.345345819	0.792489623	57.84896814	44.3304737	17.00991947	0.142122889	0.066285747
8.08988764	1.346889604	0.79336271	58.34582624	44.38036835	17.02975848	0.142286279	0.066873445
8.151174668	1.348407507	0.794221289	58.84233603	44.42942329	17.04926233	0.142446882	0.067461063
8.212461696	1.349900243	0.795065761	59.33849022	44.47766187	17.06844026	0.142604775	0.068048594
8.273748723	1.351368512	0.795896521	59.83428173	44.52510689	17.08730134	0.142760035	0.068636027
8.335035751	1.352812998	0.796713952	60.32970365	44.57178062	17.10585443	0.142912736	0.069223357
8.396322778	1.354234245	0.797518363	60.82475058	44.61770085	17.12410659	0.143062937	0.069810575
8.457609806	1.355632706	0.798310012	61.31941812	44.66288239	17.14206371	0.143210683	0.070397676
8.518896834	1.357009152	0.799089326	61.81369848	44.70735018	17.15973575	0.143356061	0.070984652
8.580183861	1.358364171	0.799856636	62.30758583	44.75112325	17.17713034	0.143499137	0.071571494
8.641470889	1.359698333	0.800612259	62.80107457	44.79422007	17.19425487	0.143639972	0.072158196
8.702757916	1.361012194	0.801356505	63.29415924	44.83665859	17.21111655	0.143778627	0.072744752
8.764044944	1.362306294	0.802089676	63.78683459	44.8784562	17.22772237	0.143915162	0.073331155
8.825331971	1.363581159	0.802812064	64.2790955	44.91962983	17.24407914	0.144049636	0.073917399
8.886618999	1.364837301	0.803523953	64.77093706	44.9601959	17.26019351	0.144182105	0.074503478
8.947906027	1.36607518	0.80422562	65.26235457	45.00017064	17.27607142	0.144312609	0.075089385
9.009193054	1.367295276	0.804917333	65.75334342	45.03956962	17.29171907	0.144441201	0.075675116
9.070480082	1.368498071	0.805599353	66.24389911	45.07840784	17.30714273	0.144567938	0.076260664
9.131767109	1.369684018	0.806271934	66.73401731	45.11670001	17.32234829	0.144692868	0.076846024
9.193054137	1.37085356	0.806935324	67.22369382	45.15446047	17.33734145	0.144816041	0.077431191
9.254341164	1.372007126	0.807589762	67.71292458	45.19170318	17.35212781	0.144937502	0.078016159
9.315628192	1.373145136	0.808235485	68.20170563	45.22844173	17.36671278	0.145057296	0.078600924
9.37691522	1.374267997	0.808872722	68.69003316	45.26468941	17.38110168	0.145175469	0.079185481
9.438202247	1.37537611	0.809501695	69.17790344	45.30045916	17.39529966	0.145292063	0.079769825
9.499489275	1.376469826	0.810122603	69.66531334	45.33576247	17.40931127	0.145407112	0.080353952
9.560776302	1.37754954	0.810735668	70.15225915	45.37061221	17.42314165	0.145520662	0.080937857
9.62206333	1.378615623	0.811341098	70.63873746	45.40502041	17.43679557	0.145632752	0.081521535
9.683350358	1.379668433	0.811939095	71.12474497	45.4389988	17.4502777	0.14574342	0.082104983
9.744637385	1.380708321	0.812529857	71.6102785	45.47255884	17.46359257	0.145852703	0.082688196
9.805924413	1.38173563	0.813113578	72.09533493	45.50571177	17.47674463	0.145960637	0.08327117
9.86721144	1.382750696	0.813690447	72.57991122	45.53846864	17.48973823	0.146067259	0.083853901
9.928498468	1.38375385	0.814260653	73.06400438	45.57084027	17.50257765	0.146172602	0.084436385
9.989785495	1.384745354	0.814824337	73.54761231	45.60283488	17.5152663	0.146276698	0.085018619
10.05107252	1.385725247	0.815381481	74.03073591	45.63445127	17.52780473	0.146379562	0.085600604
10.11235955	1.386694031	0.815932399	74.51336981	45.66570778	17.54019942	0.146481238	0.086182332
10.17364658	1.387651994	0.816477252	74.99551155	45.69661372	17.55245408	0.146581757	0.086763801
10.23493361	1.388599417	0.8170162	75.47715871	45.72717829	17.56457236	0.146681149	0.087345007
10.29622063	1.389536578	0.817549397	75.95830893	45.75741058	17.57655785	0.146779443	0.087925946
10.35750766	1.39046375	0.818077	76.43895985	45.78731954	17.58841408	0.146876668	0.088506616
10.41879469	1.391381203	0.818599162	76.91910917	45.8169141	17.60014456	0.146972853	0.089087013
10.48008172	1.392289205	0.819116035	77.3987546	45.84620312	17.61175275	0.147068025	0.089667135
10.54136874	1.393188022	0.819627772	77.87789386	45.8751954	17.6232421	0.147162213	0.090246977
10.60265577	1.394077919	0.820134525	78.35652468	45.90389977	17.63461601	0.147255443	0.090826537
10.6639428	1.394959159	0.820636444	78.8346448	45.93232504	17.64587791	0.147347742	0.091405811
10.72522983	1.395832007	0.821133684	79.31225194	45.96048008	17.6570312	0.147439138	0.091984797
10.78651685	1.396696725	0.821626397	79.78934381	45.98837378	17.66807928	0.147529658	0.092563491
10.84780388	1.397553579	0.822114737	80.2659181	46.01601513	17.67902558	0.147619327	0.09314189
10.90909091	1.39840202	0.822598314	80.7419829	46.04338108	17.68986315	0.14770811	0.093720001
10.97037794	1.399242067	0.823077117	81.21753905	46.07047099	17.70059225	0.147796015	0.094297826
11.03166496	1.400074536	0.823551675	81.69257713	46.09731569	17.71122336	0.147883111	0.094875354
11.09295199	1.400899631	0.824022101	82.16709559	46.12392186	17.7217591	0.147969418	0.095452581
11.15423902	1.401717554	0.824488511	82.64109287	46.15029619	17.73220209	0.148054958	0.096029505
11.21552605	1.402528509	0.824951022	83.11456743	46.17644538	17.74255495	0.148139752	0.096606125
11.27681307	1.403332696	0.825409748	83.58751769	46.20237614	17.7528203	0.148223821	0.097182437
11.3381001	1.404130319	0.825864807	84.05994208	46.22809523	17.76300076	0.148307187	0.09775844
11.39938713	1.404921581	0.826316315	84.53183902	46.25360949	17.77309896	0.148389869	0.098334131
11.46067416	1.405706689	0.826764393	85.00320687	46.27892582	17.78311756	0.148471891	0.098909507
11.52196118	1.406485849	0.82720916	85.474044	46.30405122	17.79305925	0.148553271	0.099484565
11.58324821	1.407259271	0.827650739	85.94434871	46.3289928	17.80292672	0.148634032	0.100059305
11.64453524	1.408027168	0.828089255	86.41411928	46.35375781	17.81272273	0.148714196	0.100633722
11.70582227	1.408789756	0.828524836	86.88335394	46.37835364	17.82245007	0.148793783	0.101207814
11.7671093	1.409547256	0.82895761	87.35205086	46.40278784	17.83211159	0.148872817	0.101781579
11.82839632	1.410297876	0.829386393	87.82023357	46.42699107	17.84168438	0.148951142	0.102355041
11.88968335	1.411042979	0.829812062	88.28788585	46.45101458	17.85118591	0.149028881	0.102928182
11.95097038	1.411782939	0.830234849	88.75500391	46.47487184	17.86062098	0.149106068	0.103500997
12.01225741	1.412517896	0.830654833	89.2215869	46.49856745	17.86999142	0.14918272	0.104073486
12.07354443	1.413247993	0.831072092	89.68763397	46.522106	17.87929907	0.14925885	0.104645645
12.13483146	1.41397337	0.831486707	90.15314429	46.54549208	17.88854575	0.149334474	0.105217473
12.19611849	1.414694168	0.831898757	90.61811701	46.56873026	17.89773329	0.149409605	0.105788969
12.25740552	1.415410527	0.83230832	91.08255128	46.59182513	17.9068635	0.14948426	0.106360132
12.31869254	1.416122589	0.832715477	91.54644625	46.6147813	17.91593823	0.149558452	0.106930959
12.37997957	1.416830495	0.833120307	92.00980107	46.63760342	17.92495929	0.149632197	0.107501449
12.4412666	1.417534388	0.833522891	92.47261485	46.66029614	17.93392855	0.149705509	0.108071601
12.50255363	1.418234412	0.833923311	92.93488672	46.68286418	17.94284786	0.149778403	0.108641412
12.56384065	1.418930712	0.834321649	93.39661576	46.70531232	17.9517191	0.149850894	0.109210882
12.62512768	1.419623435	0.834717988	93.85780105	46.72764539	17.96054419	0.149922996	0.109780008
12.68641471	1.420312365	0.835112199	94.31844576	46.74985597	17.9693203	0.149994693	0.110348793
12.74770174	1.420996526	0.835503712	94.77856157	46.77191118	17.97803479	0.150065896	0.110917249
12.80898876	1.421677053	0.835893184	95.23813646	46.79384902	17.98670234	0.150136709	0.111485362
12.87027579	1.422354029	0.836280665	95.69717018	46.8156723	17.99532406	0.150207144	0.112053132
12.93156282	1.423027539	0.836666201	96.15566251	46.83738374	18.00390105	0.150277209	0.112620557
12.99284985	1.423697665	0.837049837	96.61361324	46.85898601	18.01243435	0.150346913	0.113187638
13.05413687	1.424364487	0.83743162	97.07102218	46.88048174	18.02092499	0.150416266	0.113754371
13.1154239	1.425028083	0.837811593	97.52788917	46.90187347	18.02937399	0.150485276	0.114320758
13.17671093	1.425688528	0.838189798	97.98421405	46.92316372	18.03778232	0.150553951	0.114886797
13.23799796	1.426345899	0.838566277	98.43999668	46.94435492	18.04615095	0.150622301	0.115452487
13.29928498	1.427000267	0.838941073	98.89523694	46.9654495	18.05448083	0.150690332	0.116017828
13.36057201	1.427651706	0.839314224	99.34993473	46.98644982	18.06277288	0.150758055	0.116582819
13.42185904	1.428300284	0.839685772	99.80408994	47.00735822	18.07102801	0.150825477	0.117147458
13.48314607	1.428946072	0.840055755	100.2577025	47.02817698	18.0792471	0.150892605	0.117711745
13.54443309	1.429589138	0.840424211	100.7107723	47.04890837	18.08743103	0.150959449	0.11827568
13.60572012	1.430229344	0.84079106	101.163302	47.06954706	18.09557814	0.151025985	0.118839265
13.66700715	1.430866732	0.841156325	101.6152917	47.09009441	18.103689	0.151092217	0.119402498
13.72829418	1.431501483	0.841520111	102.06674	47.1105568	18.11176583	0.151158171	0.119965379
13.78958121	1.432133645	0.841882445	102.517647	47.13093582	18.11980929	0.151223852	0.120527906
13.85086823	1.432763265	0.842243353	102.9680129	47.15123304	18.12782	0.151289265	0.121090078
13.91215526	1.433390391	0.842602862	103.4178379	47.17144995	18.13579855	0.151354416	0.121651896
13.97344229	1.434015067	0.842960998	103.8671221	47.19158799	18.14374552	0.151419309	0.122213359
14.03472932	1.434637335	0.843317784	104.3158657	47.21164856	18.15166146	0.151483949	0.122774467
14.09601634	1.435257238	0.843673244	104.7640691	47.23163301	18.15954693	0.151548341	0.123335219
14.15730337	1.435874815	0.844027402	105.2117324	47.25154265	18.16740245	0.151612489	0.123895614
14.2185904	1.436490105	0.844380279	105.6588559	47.27137875	18.17522851	0.151676399	0.124455653
14.27987743	1.437103146	0.844731898	106.1054399	47.29114253	18.18302562	0.151740073	0.125015335
14.34116445	1.437713975	0.845082279	106.5514846	47.31083519	18.19079425	0.151803517	0.12557466
14.40245148	1.438322627	0.845431443	106.9969903	47.33045787	18.19853486	0.151866733	0.126133627
14.46373851	1.438929137	0.845779409	107.4419574	47.35001171	18.20624791	0.151929727	0.126692236
14.52502554	1.439533646	0.846126224	107.8863856	47.36950024	18.21393516	0.151992503	0.127250486
14.58631256	1.440136119	0.84647189	108.3302754	47.38892298	18.2215962	0.152055065	0.127808377
14.64759959	1.440736585	0.846816426	108.7736274	47.40828092	18.22923143	0.152117416	0.128365909
14.70888662	1.441335081	0.84715985	109.2164417	47.42757519	18.23684131	0.152179559	0.128923082
14.77017365	1.441931642	0.847502181	109.6587187	47.4468069	18.24442631	0.152241498	0.129479895
14.83146067	1.442526304	0.84784344	110.1004588	47.46597715	18.2519869	0.152303236	0.130036348
14.8927477	1.443119102	0.848183644	110.5416621	47.48508704	18.25952353	0.152364777	0.130592441
14.95403473	1.443710072	0.848522812	110.9823291	47.50413764	18.26703666	0.152426125	0.131148173
15.01532176	1.444299249	0.848860964	111.42246	47.52313006	18.27452677	0.152487282	0.131703544
15.07660878	1.444886669	0.849198118	111.8620552	47.54206537	18.2819943	0.152548253	0.132258554
15.13789581	1.445472367	0.849534292	112.3011149	47.56094466	18.28943973	0.152609039	0.132813203
15.19918284	1.446056379	0.849869505	112.7396396	47.57976901	18.29686352	0.152669645	0.13336749
15.26046987	1.446638742	0.850203776	113.1776295	47.59853953	18.30426614	0.152730074	0.133921414
15.32175689	1.447219492	0.850537125	113.6150848	47.61725731	18.31164809	0.152790328	0.134474977
15.38304392	1.447798604	0.850869543	114.0520065	47.63592194	18.319009	0.15285041	0.135028177
15.44433095	1.44837598	0.851200994	114.4883961	47.65453109	18.32634754	0.152910315	0.135581016
15.50561798	1.448951785	0.851531549	114.9242527	47.67308911	18.3336659	0.152970053	0.136133493
15.56690501	1.449526048	0.851861225	115.3595767	47.69159691	18.34096448	0.153029627	0.136685607
15.62819203	1.450098798	0.852190039	115.7943684	47.71005543	18.34824365	0.15308904	0.137237358
15.68947906	1.450670066	0.852518004	116.2286283	47.72846558	18.35550379	0.153148294	0.137788746
15.75076609	1.45123988	0.852845139	116.6623567	47.74682829	18.36274529	0.153207392	0.13833977
15.81205312	1.451808272	0.853171459	117.0955539	47.76514452	18.36996854	0.153266338	0.13889043
15.87334014	1.452375271	0.85349698	117.5282203	47.78341521	18.37717392	0.153325134	0.139440727
15.93462717	1.452940907	0.853821719	117.9603563	47.80164134	18.38436183	0.153383784	0.139990659
15.9959142	1.453505213	0.854145693	118.3919622	47.81982388	18.39153267	0.15344229	0.140540227
16.05720123	1.454068219	0.854468919	118.8230383	47.83796383	18.39868685	0.153500655	0.14108943
16.11848825	1.454629959	0.854791414	119.253585	47.85606222	18.40582479	0.153558883	0.141638268
16.17977528	1.455190464	0.855113196	119.6836027	47.87412006	18.4129469	0.153616977	0.142186741
16.24106231	1.455749768	0.855434284	120.1130915	47.89213843	18.42005362	0.15367494	0.142734849
16.30234934	1.456307652	0.855754569	120.5420544	47.91011092	18.42714215	0.153732755	0.143282593
16.36363636	1.456864161	0.856074075	120.9704914	47.9280389	18.43421307	0.153790426	0.143829974
16.42492339	1.457419444	0.856392878	121.3984019	47.94592687	18.44126826	0.153847966	0.144376991
16.48621042	1.457973518	0.856710989	121.8257863	47.96377546	18.44830799	0.153905377	0.144923642
16.54749745	1.458526404	0.857028419	122.2526449	47.98158533	18.45533249	0.153962661	0.145469928
16.60878447	1.459078119	0.857345179	122.6789783	47.99935709	18.46234199	0.15401982	0.146015849
16.6700715	1.459628682	0.857661281	123.1047869	48.01709139	18.46933674	0.154076857	0.146561404
16.73135853	1.460178111	0.857976734	123.5300713	48.03478885	18.47631696	0.154133773	0.147106594
16.79264556	1.460726423	0.85829155	123.9548317	48.05245009	18.48328289	0.154190571	0.147651419
16.85393258	1.461273635	0.85860574	124.3790687	48.07007575	18.49023473	0.154247253	0.148195877
16.91521961	1.461819766	0.858919314	124.8027828	48.08766642	18.49717272	0.154303821	0.14873997
16.97650664	1.462364831	0.859232282	125.2259744	48.10522275	18.50409707	0.154360278	0.149283697
17.03779367	1.462908848	0.859544657	125.6486439	48.12274533	18.511008	0.154416625	0.149827058
17.09908069	1.463451833	0.859856448	126.0707919	48.14023481	18.51790572	0.154472864	0.150370053
17.16036772	1.463993802	0.860167666	126.4924187	48.15769178	18.52479043	0.154528999	0.150912682
17.22165475	1.464534632	0.86047821	126.9135269	48.17511046	18.5316606	0.154585006	0.151454947
17.28294178	1.465074436	0.860788168	127.3341156	48.19249589	18.53851765	0.154640904	0.151996846
17.3442288	1.465613227	0.861097548	127.7541852	48.20984858	18.54536173	0.154696695	0.152538379
17.40551583	1.466151014	0.861406357	128.1737362	48.22716886	18.55219298	0.154752382	0.153079547
17.46680286	1.466687807	0.8617146	128.5927692	48.24445709	18.55901152	0.154807964	0.153620348
17.52808989	1.467223616	0.862022283	129.0112848	48.26171358	18.56581746	0.154863443	0.154160784
17.58937692	1.467758447	0.862329412	129.4292834	48.27893864	18.57261092	0.154918821	0.154700855
17.65066394	1.468292309	0.862635991	129.8467657	48.29613256	18.579392	0.154974098	0.155240559
17.71195097	1.46882521	0.862942026	130.2637322	48.31329561	18.58616078	0.155029276	0.155779898
17.773238	1.469357157	0.86324752	130.6801835	48.33042807	18.59291737	0.155084355	0.156318871
17.83452503	1.469888155	0.863552478	131.0961201	48.34753018	18.59966184	0.155139336	0.156857478
17.89581205	1.470418211	0.863856904	131.5115426	48.36460217	18.60639428	0.155194221	0.15739572
17.95709908	1.47094733	0.864160802	131.9264516	48.38164426	18.61311475	0.15524901	0.157933596
18.01838611	1.471475517	0.864464176	132.3408476	48.39865666	18.61982332	0.155303704	0.158471107
18.07967314	1.472002804	0.864767035	132.7547311	48.41563996	18.62652039	0.155358304	0.159008252
18.14096016	1.472529237	0.865069395	133.1681026	48.43259498	18.63320655	0.15541281	0.159545031
18.20224719	1.473054777	0.865371246	133.5809628	48.44952124	18.63988131	0.155467223	0.160081445
18.26353422	1.47357943	0.865672592	133.9933122	48.46641894	18.64654474	0.155521543	0.160617494
18.32482125	1.474103204	0.865973436	134.4051515	48.48328827	18.65319695	0.155575772	0.161153177
18.38610827	1.474626103	0.866273782	134.8164812	48.50012941	18.659838	0.15562991	0.161688495
18.4473953	1.475148136	0.866573633	135.2273019	48.51694255	18.66646799	0.155683958	0.162223447
18.50868233	1.475669307	0.866872991	135.6376142	48.53372784	18.67308698	0.155737916	0.162758034
18.56996936	1.476189622	0.86717186	136.0474187	48.55048544	18.67969506	0.155791785	0.163292256
18.63125638	1.476709088	0.867470242	136.456716	48.5672155	18.6862923	0.155845565	0.163826113
18.69254341	1.477227709	0.867768139	136.8655066	48.58391817	18.69287878	0.155899256	0.164359606
18.75383044	1.477745492	0.868065554	137.2737912	48.60059356	18.69945457	0.155952859	0.164892733
18.81511747	1.478262442	0.868362488	137.6815704	48.61724181	18.70601974	0.156006375	0.165425495
18.87640449	1.478778565	0.868658945	138.0888446	48.63386303	18.71257435	0.156059803	0.165957893
18.93769152	1.479293865	0.868954925	138.4956147	48.65045733	18.71911849	0.156113143	0.166489926
18.99897855	1.479808364	0.869250454	138.9018807	48.66702621	18.72565241	0.156166403	0.167021594
19.06026558	1.480322064	0.869545531	139.3076433	48.68356953	18.73217614	0.15621958	0.167552897
19.1215526	1.480834965	0.869840148	139.7129032	48.70008688	18.73868968	0.156272674	0.168083835
19.18283963	1.481347073	0.870134308	140.1176611	48.71657843	18.74519312	0.156325684	0.168614409
19.24412666	1.481858394	0.870428014	140.5219175	48.73304435	18.75168654	0.156378611	0.169144619
19.30541369	1.482368936	0.870721269	140.925673	48.74948482	18.75817002	0.156431456	0.169674464
19.36670072	1.482878703	0.871014076	141.3289282	48.76590001	18.76464363	0.15648422	0.170203944
19.42798774	1.483387702	0.871306439	141.7316836	48.78229008	18.77110748	0.156536901	0.170733061
19.48927477	1.483895941	0.87159836	142.1339398	48.79865523	18.77756164	0.156589502	0.171261813
19.5505618	1.484403426	0.871889842	142.5356973	48.81499562	18.7840062	0.156642023	0.171790201
19.61184883	1.484910163	0.872180888	142.9369568	48.83131143	18.79044124	0.156694463	0.172318226
19.67313585	1.485416161	0.872471502	143.3377189	48.84760285	18.79686687	0.156746824	0.172845886
19.73442288	1.485921426	0.872761687	143.737984	48.86387007	18.80328318	0.156799106	0.173373182
19.79570991	1.486425965	0.873051446	144.1377527	48.88011328	18.80969026	0.15685131	0.173900114
19.85699694	1.486929785	0.873340783	144.5370257	48.89633264	18.81608818	0.156903436	0.174426683
19.91828396	1.487432806	0.873629677	144.9358039	48.91252704	18.82247592	0.156955483	0.174952888
19.97957099	1.487935099	0.873918148	145.3340876	48.92869765	18.8288544	0.157007454	0.17547873
20.04085802	1.48843667	0.8742062	145.7318773	48.94484461	18.83522368	0.157059348	0.176004208
20.10214505	1.488937522	0.874493836	146.1291736	48.96096809	18.84158382	0.157111166	0.176529323
20.16343207	1.489437662	0.874781058	146.525977	48.97706825	18.8479349	0.157162908	0.177054075
20.2247191	1.489937093	0.875067868	146.9222882	48.99314526	18.85427696	0.157214576	0.177578463
20.28600613	1.49043582	0.875354271	147.3181077	49.00919928	18.86061007	0.157266168	0.178102489
20.34729316	1.490933849	0.875640268	147.7134361	49.02523048	18.86693429	0.157317687	0.178626151
20.40858018	1.491431183	0.875925864	148.1082739	49.04123905	18.87324969	0.157369133	0.17914945
20.46986721	1.491927829	0.87621106	148.5026218	49.05722515	18.87955632	0.157420506	0.179672386
20.53115424	1.49242379	0.87649586	148.8964801	49.07318898	18.88585424	0.157471807	0.18019496
20.59244127	1.492919072	0.876780268	149.2898496	49.08913071	18.89214354	0.157523036	0.18071717
20.65372829	1.49341368	0.877064286	149.6827308	49.10505055	18.89842425	0.157574194	0.181239018
20.71501532	1.493907618	0.877347919	150.0751242	49.12094869	18.90469646	0.157625283	0.181760503
20.77630235	1.494400871	0.877631153	150.4670307	49.13682439	18.91095994	0.157676298	0.182281626
20.83758938	1.494893417	0.877913973	150.8584511	49.15267676	18.91721444	0.157727238	0.182802387
20.8988764	1.49538529	0.878196404	151.2493856	49.16850724	18.92346038	0.157778108	0.183322786
20.96016343	1.495876493	0.878478448	151.6398349	49.18431595	18.92969781	0.157828907	0.183842823
21.02145046	1.496367029	0.878760107	152.0297994	49.20010299	18.93592675	0.157879636	0.184362498
21.08273749	1.4968569	0.879041383	152.4192798	49.21586848	18.94214724	0.157930295	0.184881811
21.14402451	1.497346109	0.879322277	152.8082766	49.23161252	18.94835931	0.157980886	0.185400762
21.20531154	1.497834658	0.879602792	153.1967904	49.24733521	18.95456298	0.158031407	0.185919351
21.26659857	1.49832255	0.879882929	153.5848218	49.26303667	18.9607583	0.158081861	0.186437579
21.3278856	1.498809785	0.880162689	153.9723713	49.27871699	18.96694527	0.158132246	0.186955446
21.38917263	1.499296367	0.880442076	154.3594396	49.29437627	18.97312394	0.158182564	0.187472951
21.45045965	1.499782298	0.88072109	154.7460272	49.31001462	18.97929432	0.158232814	0.187990094
21.51174668	1.500267578	0.880999733	155.1321347	49.32563213	18.98545643	0.158282998	0.188506877
21.57303371	1.50075221	0.881278006	155.5177626	49.34122891	18.9916103	0.158333116	0.189023298
21.63432074	1.501236195	0.881555913	155.9029116	49.35680505	18.99775594	0.158383167	0.189539359
21.69560776	1.501719545	0.881833443	156.2875823	49.37236004	19.00389351	0.15843315	0.190055059
21.75689479	1.502202258	0.882110602	156.6717754	49.38789415	19.01002299	0.158483064	0.190570398
21.81818182	1.502684332	0.882387394	157.0554913	49.40340763	19.01614435	0.158532913	0.191085377
21.87946885	1.503165769	0.88266382	157.4387306	49.41890054	19.02225763	0.158582695	0.191599995
21.94075587	1.503646572	0.882939881	157.8214939	49.43437295	19.02836283	0.158632412	0.192114253
22.0020429	1.504126741	0.883215577	158.2037817	49.44982489	19.03445998	0.158682062	0.19262815
22.06332993	1.504606278	0.88349091	158.5855948	49.46525642	19.0405491	0.158731647	0.193141688
22.12461696	1.505085185	0.883765881	158.9669335	49.48066758	19.0466302	0.158781167	0.193654866
22.18590398	1.505563462	0.88404049	159.3477986	49.49605842	19.05270331	0.158830621	0.194167684
22.24719101	1.506041111	0.884314737	159.7281907	49.51142896	19.05876845	0.158880011	0.194680142
22.30847804	1.506518134	0.884588624	160.1081102	49.52677925	19.06482562	0.158929335	0.19519224
22.36976507	1.506994532	0.884862151	160.4875578	49.5421093	19.07087485	0.158978595	0.195703979
22.43105209	1.507470305	0.885135319	160.866534	49.55741916	19.07691614	0.159027789	0.196215359
22.49233912	1.507945456	0.885408127	161.2450395	49.57270883	19.08294952	0.159076919	0.19672638
22.55362615	1.508419989	0.88568058	161.6230748	49.58797853	19.08897506	0.159125985	0.197237041
22.61491318	1.508893971	0.885952719	162.0006398	49.60323075	19.0949936	0.159174994	0.197747343
22.6762002	1.509367347	0.886224509	162.3777356	49.61846339	19.10100443	0.159223939	0.198257286
22.73748723	1.509840117	0.886495951	162.7543629	49.63367649	19.10700759	0.159272822	0.19876687
22.79877426	1.510312285	0.886767046	163.1305222	49.64887009	19.11300307	0.159321642	0.199276095
22.86006129	1.51078385	0.887037794	163.506214	49.66404422	19.11899091	0.159370399	0.199784962
22.92134831	1.511254813	0.887308196	163.8814391	49.67919893	19.12497112	0.159419094	0.20029347
22.98263534	1.511725178	0.887578252	164.2561979	49.69433423	19.1309437	0.159467727	0.20080162
23.04392237	1.512194943	0.887847962	164.630491	49.70945016	19.13690869	0.159516297	0.201309412
23.1052094	1.512664111	0.888117328	165.004319	49.72454673	19.14286608	0.159564805	0.201816845
23.16649642	1.513132681	0.888386349	165.3776825	49.73962396	19.14881589	0.159613251	0.202323921
23.22778345	1.513600656	0.888655026	165.750582	49.75468186	19.15475814	0.159661635	0.202830639
23.28907048	1.514068036	0.888923359	166.1230182	49.76972045	19.16069282	0.159709956	0.203337
23.35035751	1.51453482	0.889191348	166.4949916	49.78473973	19.16661996	0.159758216	0.203843003
23.41164454	1.515001011	0.889458993	166.8665029	49.7997397	19.17253955	0.159806413	0.204348648
23.47293156	1.515466608	0.889726294	167.2375525	49.81472037	19.1784516	0.159854548	0.204853937
23.53421859	1.515931612	0.889993251	167.6081411	49.82968173	19.18435613	0.159902621	0.205358868
23.59550562	1.516396022	0.890259864	167.9782692	49.84462377	19.19025312	0.159950632	0.205863443
23.65679265	1.51685984	0.890526133	168.3479375	49.85954648	19.1961426	0.159998581	0.20636766
23.71807967	1.517323066	0.890792058	168.7171465	49.87444984	19.20202455	0.160046468	0.206871521
23.7793667	1.517785699	0.891057638	169.0858968	49.88933385	19.20789897	0.160094293	0.207375026
23.84065373	1.518247739	0.891322872	169.4541889	49.90419846	19.21376588	0.160142055	0.207878174
23.90194076	1.518709186	0.891587762	169.8220236	49.91904367	19.21962527	0.160189754	0.208380967
23.96322778	1.519170041	0.891852305	170.1894013	49.93386944	19.22547713	0.160237392	0.208883403
24.02451481	1.519630302	0.892116502	170.5563226	49.94867573	19.23132146	0.160284966	0.209385483
24.08580184	1.52008997	0.892380352	170.9227881	49.96346251	19.23715826	0.160332478	0.209887208
24.14708887	1.520549044	0.892643854	171.2887985	49.97822975	19.24298752	0.160379927	0.210388577
24.20837589	1.521007523	0.892907008	171.6543542	49.99297739	19.24880923	0.160427313	0.210889591
24.26966292	1.521465407	0.893169812	172.019456	50.00770539	19.25462339	0.160474636	0.211390249
24.33094995	1.521922695	0.893432267	172.3841043	50.0224137	19.26042999	0.160521896	0.211890553
24.39223698	1.522379386	0.89369437	172.7482997	50.03710226	19.26622902	0.160569092	0.212390501
24.453524	1.522835587	0.893956208	173.1120414	50.05177608	19.27202183	0.16061624	0.212890093
24.51481103	1.523291349	0.894217818	173.4753294	50.06643744	19.27780904	0.160663349	0.213389329
24.57609806	1.523746542	0.894479099	173.8381658	50.08108036	19.28358904	0.160710398	0.213888209
24.63738509	1.524201168	0.894740052	174.2005513	50.09570483	19.28936183	0.160757388	0.214386735
24.69867211	1.524655227	0.895000676	174.5624864	50.11031088	19.29512744	0.160804319	0.214884906
24.75995914	1.52510872	0.895260972	174.9239717	50.1248985	19.30088585	0.16085119	0.215382722
24.82124617	1.525561646	0.895520939	175.2850078	50.13946769	19.30663707	0.160898002	0.215880185
24.8825332	1.526014006	0.895780578	175.6455951	50.15401845	19.31238112	0.160944755	0.216377293
24.94382022	1.526465801	0.896039889	176.0057344	50.16855078	19.31811798	0.160991449	0.216874047
25.00510725	1.526917029	0.896298871	176.3654261	50.18306468	19.32384767	0.161038083	0.217370448
25.06639428	1.527367693	0.896557524	176.7246708	50.19756014	19.32957018	0.161084659	0.217866495
25.12768131	1.527817791	0.896815849	177.0834691	50.21203714	19.33528551	0.161131174	0.218362188
25.18896834	1.528267323	0.897073845	177.4418216	50.22649568	19.34099367	0.161177631	0.218857528
25.25025536	1.52871629	0.897331511	177.7997287	50.24093574	19.34669466	0.161224028	0.219352514
25.31154239	1.529164691	0.897588849	178.1571912	50.2553573	19.35238846	0.161270365	0.219847148
25.37282942	1.529612527	0.897845856	178.5142094	50.26976035	19.35807509	0.161316643	0.220341428
25.43411645	1.530059796	0.898102533	178.8707841	50.28414486	19.36375454	0.161362862	0.220835356
25.49540347	1.530506499	0.89835888	179.2269158	50.29851082	19.3694268	0.16140902	0.221328932
25.5566905	1.530952636	0.898614897	179.582605	50.31285819	19.37509186	0.161455119	0.221822155
25.61797753	1.531398205	0.898870582	179.9378523	50.32718695	19.38074974	0.161501158	0.222315025
25.67926456	1.531843207	0.899125935	180.2926583	50.34149708	19.38640041	0.161547137	0.222807544
25.74055158	1.532287641	0.899380955	180.6470235	50.35578852	19.39204388	0.161593056	0.22329971
25.80183861	1.532731506	0.899635643	181.0009485	50.37006127	19.39768014	0.161638915	0.223791525
25.86312564	1.533174803	0.899889998	181.3544339	50.38431527	19.40330917	0.161684714	0.224282988
25.92441267	1.533617529	0.900144018	181.7074802	50.39855048	19.40893097	0.161730452	0.224774099
25.98569969	1.534059685	0.900397704	182.060088	50.41276688	19.41454553	0.16177613	0.22526486
26.04698672	1.534501269	0.900651054	182.4122579	50.4269644	19.42015285	0.161821747	0.225755269
26.10827375	1.534942281	0.900904068	182.7639904	50.44114302	19.4257529	0.161867303	0.226245327
26.16956078	1.53538272	0.901156744	183.115286	50.45530268	19.43134568	0.161912799	0.226735034
26.2308478	1.535822585	0.901409083	183.4661455	50.46944333	19.43693118	0.161958233	0.227224391
26.29213483	1.536261875	0.901661084	183.8165692	50.48356492	19.44250938	0.162003605	0.227713397
26.35342186	1.536700795	0.901912906	184.1665551	50.49767695	19.44808288	0.162048948	0.22820205
26.41470889	1.537139213	0.902164447	184.5161054	50.51177328	19.45364999	0.16209424	0.228690351
26.47599591	1.537577084	0.902415671	184.8652213	50.52585185	19.45921016	0.162139474	0.229178302
26.53728294	1.538014409	0.902666579	185.2139034	50.53991269	19.46476341	0.162184652	0.229665903
26.59856997	1.538451188	0.902917171	185.5621521	50.55395579	19.47030972	0.162229773	0.230153153
26.659857	1.538887422	0.903167447	185.909968	50.56798118	19.47584911	0.162274836	0.230640054
26.72114402	1.539323111	0.903417407	186.2573517	50.58198886	19.48138158	0.162319843	0.231126604
26.78243105	1.539758254	0.903667052	186.6043036	50.59597886	19.48690713	0.162364793	0.231612805
26.84371808	1.540192853	0.903916382	186.9508245	50.60995117	19.49242577	0.162409686	0.232098656
26.90500511	1.540626908	0.904165396	187.2969147	50.62390582	19.4979375	0.162454523	0.232584158
26.96629213	1.541060418	0.904414096	187.6425748	50.6378428	19.50344232	0.162499302	0.233069311
27.02757916	1.541493385	0.904662481	187.9878053	50.65176214	19.50894023	0.162544025	0.233554114
27.08886619	1.541925808	0.904910551	188.3326069	50.66566383	19.51443125	0.162588691	0.234038569
27.15015322	1.542357687	0.905158308	188.67698	50.67954788	19.51991536	0.1626333	0.234522675
27.21144025	1.542789024	0.905405749	189.0209251	50.69341431	19.52539257	0.162677853	0.235006432
27.27272727	1.543219816	0.905652877	189.3644429	50.70726311	19.53086289	0.162722349	0.23548984
27.3340143	1.543650066	0.90589969	189.7075338	50.72109431	19.53632631	0.162766789	0.2359729
27.39530133	1.544079773	0.90614619	190.0501983	50.73490788	19.54178283	0.162811171	0.236455612
27.45658836	1.544508936	0.906392376	190.3924371	50.74870386	19.54723246	0.162855498	0.236937976
27.51787538	1.544937557	0.906638248	190.7342507	50.76248223	19.55267519	0.162899767	0.237419992
27.57916241	1.545365635	0.906883806	191.0756395	50.776243	19.55811103	0.16294398	0.237901661
27.64044944	1.545793169	0.90712905	191.4166041	50.78998617	19.56353997	0.162988137	0.238382982
27.70173647	1.546220161	0.907373981	191.7571451	50.80371175	19.56896202	0.163032237	0.238863955
27.76302349	1.54664661	0.907618598	192.0972629	50.81741973	19.57437717	0.16307628	0.239344581
27.82431052	1.547072515	0.907862901	192.4369582	50.83111012	19.57978542	0.163120267	0.23982486
27.88559755	1.547497878	0.908106891	192.7762314	50.84478292	19.58518677	0.163164197	0.240304792
27.94688458	1.547922697	0.908350567	193.1150831	50.85843812	19.59058122	0.163208071	0.240784377
28.0081716	1.548346972	0.90859393	193.4535138	50.87207572	19.59596876	0.163251888	0.241263615
28.06945863	1.548770704	0.908836979	193.7915241	50.88569573	19.6013494	0.163295648	0.241742507
28.13074566	1.549193892	0.909079714	194.1291144	50.89929813	19.60672313	0.163339352	0.242221053
28.19203269	1.549616566	0.909322151	194.4662851	50.91288382	19.61209033	0.163383003	0.242699252
28.25331971	1.550038838	0.909564351	194.8030357	50.92645625	19.6174525	0.16342661	0.243177104
28.31460674	1.550460586	0.909806248	195.1393678	50.94001168	19.622808	0.163470163	0.243654609
28.37589377	1.550881811	0.910047842	195.4752818	50.95355014	19.62815687	0.163513662	0.244131769
28.4371808	1.551302512	0.910289134	195.8107785	50.96707166	19.6334991	0.163557106	0.244608583
28.49846782	1.551722693	0.910530125	196.1458581	50.98057625	19.63883471	0.163600495	0.245085051
28.55975485	1.552142351	0.910770814	196.4805214	50.99406395	19.64416371	0.163643831	0.245561173
28.62104188	1.55256149	0.911011203	196.8147686	51.00753479	19.6494861	0.163687112	0.246036951
28.68232891	1.552980109	0.911251292	197.1486005	51.02098878	19.6548019	0.163730339	0.246512383
28.74361593	1.55339821	0.91149108	197.4820175	51.03442597	19.66011111	0.163773512	0.24698747
28.80490296	1.553815792	0.91173057	197.8150201	51.04784637	19.66541376	0.163816631	0.247462212
28.86618999	1.554232857	0.911969761	198.1476089	51.06125	19.67070984	0.163859696	0.247936609
28.92747702	1.554649406	0.912208653	198.4797843	51.07463691	19.67599936	0.163902707	0.248410662
28.98876404	1.555065439	0.912447248	198.8115468	51.08800711	19.68128234	0.163945665	0.248884371
29.05005107	1.555480957	0.912685545	199.1428971	51.10136063	19.68655879	0.163988569	0.249357735
29.1113381	1.555895961	0.912923546	199.4738355	51.11469749	19.69182872	0.16403142	0.249830754
29.17262513	1.556310452	0.91316125	199.8043626	51.12801773	19.69709213	0.164074217	0.25030343
29.23391216	1.556724431	0.913398658	200.1344788	51.14132137	19.70234904	0.164116961	0.250775762
29.29519918	1.557137897	0.913635771	200.4641849	51.15460844	19.70759946	0.164159651	0.251247751
29.35648621	1.557550853	0.913872589	200.7934811	51.16787896	19.71284339	0.164202289	0.251719395
29.41777324	1.557963299	0.914109112	201.122368	51.18113296	19.71808085	0.164244873	0.252190697
29.47906027	1.558375235	0.914345341	201.4508462	51.19437046	19.72331185	0.164287404	0.252661655
29.54034729	1.558786662	0.914581277	201.7789161	51.2075915	19.72853639	0.164329883	0.25313227
29.60163432	1.559197582	0.91481692	202.1065783	51.2207961	19.7337545	0.164372308	0.253602542
29.66292135	1.559607995	0.915052271	202.4338332	51.23398429	19.73896616	0.164414681	0.254072471
29.72420838	1.560017901	0.915287329	202.7606814	51.24715609	19.74417141	0.164457001	0.254542058
29.7854954	1.560427302	0.915522096	203.0871233	51.26031153	19.74937024	0.164499269	0.255011302
29.84678243	1.560836198	0.915756571	203.4131595	51.27345064	19.75456267	0.164541484	0.255480204
29.90806946	1.561244591	0.915990756	203.7387904	51.28657344	19.7597487	0.164583647	0.255948763
29.96935649	1.56165248	0.916224651	204.0640166	51.29967996	19.76492835	0.164625757	0.256416981
30.03064351	1.562059867	0.916458257	204.3888386	51.31277022	19.77010163	0.164667815	0.256884856
30.09193054	1.562466755	0.91669157	204.7132569	51.32584421	19.77526858	0.164709821	0.25735239
30.15321757	1.562873145	0.916924593	205.0372722	51.33890195	19.7804292	0.164751775	0.257819582
30.2145046	1.563279036	0.917157328	205.3608847	51.3519435	19.78558348	0.164793676	0.258286433
30.27579162	1.563684429	0.917389774	205.684095	51.3649689	19.79073144	0.164835526	0.258752942
30.33707865	1.564089323	0.917621932	206.0069035	51.37797816	19.79587309	0.164877324	0.259219111
30.39836568	1.564493721	0.917853803	206.3293109	51.39097132	19.80100843	0.16491907	0.259684938
30.45965271	1.564897623	0.918085387	206.6513175	51.40394839	19.80613747	0.164960764	0.260150424
30.52093973	1.565301029	0.918316685	206.9729239	51.41690942	19.81126024	0.165002407	0.26061557
30.58222676	1.565703941	0.918547697	207.2941306	51.42985441	19.81637672	0.165043999	0.261080375
30.64351379	1.566106359	0.918778423	207.6149381	51.4427834	19.82148695	0.165085539	0.26154484
30.70480082	1.566508285	0.919008864	207.9353468	51.45569642	19.82659092	0.165127027	0.262008964
30.76608784	1.566909718	0.919239021	208.2553573	51.46859349	19.83168865	0.165168465	0.262472749
30.82737487	1.56731066	0.919468893	208.57497	51.48147464	19.83678014	0.165209851	0.262936193
30.8886619	1.567711112	0.919698482	208.8941855	51.49433989	19.84186542	0.165251186	0.263399298
30.94994893	1.568111075	0.919927788	209.2130042	51.50718926	19.84694448	0.16529247	0.263862063
31.01123596	1.568510549	0.920156811	209.5314266	51.5200228	19.85201735	0.165333703	0.264324489
31.07252298	1.568909534	0.920385551	209.8494533	51.53284051	19.85708402	0.165374886	0.264786575
31.13381001	1.569308033	0.92061401	210.1670846	51.54564243	19.86214452	0.165416017	0.265248322
31.19509704	1.569706046	0.920842187	210.4843212	51.55842859	19.86719884	0.165457098	0.26570973
31.25638407	1.570103573	0.921070084	210.8011634	51.57119901	19.87224701	0.165498129	0.266170799
31.31767109	1.570500615	0.9212977	211.1176118	51.58395371	19.87728903	0.165539109	0.26663153
31.37895812	1.570897174	0.921525036	211.4336669	51.59669272	19.88232491	0.165580038	0.267091922
31.44024515	1.57129325	0.921752092	211.7493291	51.60941607	19.88735466	0.165620918	0.267551975
31.50153218	1.571688844	0.921978869	212.0645989	51.62212379	19.8923783	0.165661747	0.268011691
31.5628192	1.572083956	0.922205368	212.3794769	51.63481589	19.89739583	0.165702525	0.268471068
31.62410623	1.572478588	0.922431588	212.6939635	51.64749242	19.90240727	0.165743254	0.268930107
31.68539326	1.572872741	0.922657531	213.0080592	51.66015338	19.90741262	0.165783933	0.269388809
31.74668029	1.573266414	0.922883196	213.3217644	51.67279882	19.9124119	0.165824562	0.269847172
31.80796731	1.57365961	0.923108585	213.6350797	51.68542874	19.91740511	0.165865141	0.270305199
31.86925434	1.574052329	0.923333697	213.9480055	51.69804319	19.92239227	0.165905671	0.270762888
31.93054137	1.574444571	0.923558533	214.2605424	51.71064219	19.92737339	0.16594615	0.27122024
31.9918284	1.574836261	0.923783062	214.5726919	51.72322377	19.93234748	0.165986574	0.271677255
32.05311542	1.575227463	0.92400731	214.8844535	51.73578959	19.93731537	0.166026947	0.272133933
32.11440245	1.575618182	0.92423128	215.1958278	51.74833983	19.94227715	0.16606727	0.272590275
32.17568948	1.576008421	0.924454973	215.5068151	51.76087451	19.94723282	0.166107543	0.27304628
32.23697651	1.57639818	0.924678389	215.817416	51.77339365	19.95218239	0.166147766	0.273501948
32.29826353	1.576787458	0.924901528	216.1276308	51.78589727	19.95712588	0.166187939	0.273957281
32.35955056	1.577176257	0.92512439	216.4374602	51.7983854	19.96206328	0.166228063	0.274412277
32.42083759	1.577564578	0.925346977	216.7469046	51.81085804	19.96699461	0.166268136	0.274866938
32.48212462	1.577952421	0.925569288	217.0559644	51.82331524	19.97191987	0.16630816	0.275321263
32.54341164	1.578339787	0.925791323	217.3646402	51.83575699	19.97683908	0.166348135	0.275775252
32.60469867	1.578726675	0.926013084	217.6729323	51.84818334	19.98175224	0.16638806	0.276228906
32.6659857	1.579113088	0.92623457	217.9808414	51.86059429	19.98665936	0.166427935	0.276682224
32.72727273	1.579499026	0.926455782	218.2883678	51.87298987	19.99156044	0.166467761	0.277135208
32.78855975	1.579884489	0.92667672	218.5955121	51.8853701	19.9964555	0.166507538	0.277587856
32.84984678	1.580269478	0.926897385	218.9022747	51.89773499	20.00134455	0.166547266	0.27804017
32.91113381	1.580653994	0.927117776	219.2086561	51.91008458	20.00622759	0.166586944	0.278492149
32.97242084	1.581038036	0.927337895	219.5146567	51.92241889	20.01110462	0.166626573	0.278943794
33.03370787	1.581421607	0.927557742	219.8202771	51.93473792	20.01597567	0.166666153	0.279395104
33.09499489	1.581804707	0.927777316	220.1255177	51.94704172	20.02084074	0.166705684	0.27984608
33.15628192	1.582187335	0.927996619	220.430379	51.95933029	20.02569983	0.166745167	0.280296722
33.21756895	1.582569494	0.928215651	220.7348614	51.97160365	20.03055295	0.1667846	0.28074703
33.27885598	1.582951184	0.928434412	221.0389654	51.98386184	20.03540012	0.166823985	0.281197005
33.340143	1.583332404	0.928652902	221.3426916	51.99610487	20.04024134	0.166863321	0.281646646
33.40143003	1.583713157	0.928871123	221.6460403	52.00833276	20.04507662	0.166902608	0.282095953
33.46271706	1.584093442	0.929089074	221.949012	52.02054553	20.04990597	0.166941847	0.282544928
33.52400409	1.584473261	0.929306755	222.2516072	52.03274321	20.0547294	0.166981037	0.282993569
33.58529111	1.584852613	0.929524167	222.5538264	52.04492582	20.05954691	0.167020179	0.283441877
33.64657814	1.585231501	0.929741311	222.85567	52.05709338	20.06435852	0.167059272	0.283889853
33.70786517	1.585609924	0.929958187	223.1571385	52.06924591	20.06916423	0.167098318	0.284337496
33.7691522	1.585987883	0.930174795	223.4582323	52.08138343	20.07396406	0.167137315	0.284784807
33.83043922	1.586365378	0.930391135	223.758952	52.09350596	20.078758	0.167176263	0.285231785
33.89172625	1.586742411	0.930607209	224.0592979	52.10561353	20.08354608	0.167215164	0.285678431
33.95301328	1.587118983	0.930823015	224.3592706	52.11770616	20.08832829	0.167254017	0.286124746
34.01430031	1.587495093	0.931038556	224.6588705	52.12978387	20.09310465	0.167292822	0.286570728
34.07558733	1.587870743	0.93125383	224.958098	52.14184669	20.09787517	0.167331579	0.287016379
34.13687436	1.588245933	0.931468839	225.2569537	52.15389462	20.10263986	0.167370288	0.287461699
34.19816139	1.588620664	0.931683583	225.555438	52.16592771	20.10739872	0.167408949	0.287906687
34.25944842	1.588994937	0.931898062	225.8535513	52.17794596	20.11215176	0.167447563	0.288351344
34.32073544	1.589368753	0.932112277	226.1512941	52.1899494	20.116899	0.167486129	0.28879567
34.38202247	1.589742111	0.932326228	226.4486669	52.20193806	20.12164044	0.167524648	0.289239665
34.4433095	1.590115014	0.932539915	226.7456701	52.21391195	20.12637609	0.167563119	0.28968333
34.50459653	1.590487461	0.932753339	227.0423042	52.2258711	20.13110596	0.167601543	0.290126664
34.56588355	1.590859453	0.9329665	227.3385696	52.23781553	20.13583005	0.16763992	0.290569668
34.62717058	1.591230991	0.933179398	227.6344667	52.24974526	20.14054839	0.167678249	0.291012341
34.68845761	1.591602077	0.933392035	227.9299962	52.26166031	20.14526098	0.167716532	0.291454685
34.74974464	1.591972709	0.93360441	228.2251583	52.27356072	20.14996782	0.167754767	0.291896698
34.81103166	1.59234289	0.933816523	228.5199535	52.28544649	20.15466893	0.167792955	0.292338382
34.87231869	1.59271262	0.934028376	228.8143824	52.29731766	20.15936432	0.167831096	0.292779737
34.93360572	1.5930819	0.934239968	229.1084453	52.30917424	20.16405399	0.167869191	0.293220762
34.99489275	1.59345073	0.9344513	229.4021427	52.32101626	20.16873796	0.167907238	0.293661458
35.05617978	1.593819111	0.934662372	229.695475	52.33284374	20.17341623	0.167945239	0.294101825
35.1174668	1.594187045	0.934873185	229.9884428	52.3446567	20.17808881	0.167983194	0.294541863
35.17875383	1.594554531	0.935083739	230.2810463	52.35645517	20.18275572	0.168021101	0.294981572
35.24004086	1.59492157	0.935294035	230.5732862	52.36823916	20.18741696	0.168058963	0.295420952
35.30132789	1.595288164	0.935504072	230.8651629	52.38000871	20.19207254	0.168096777	0.295860005
35.36261491	1.595654313	0.935713852	231.1566767	52.39176384	20.19672248	0.168134546	0.296298729
35.42390194	1.596020017	0.935923374	231.4478281	52.40350456	20.20136678	0.168172268	0.296737124
35.48518897	1.596385278	0.936132639	231.7386177	52.4152309	20.20600545	0.168209944	0.297175193
35.546476	1.596750096	0.936341647	232.0290457	52.42694289	20.2106385	0.168247574	0.297612933
35.60776302	1.597114472	0.9365504	232.3191127	52.43864054	20.21526594	0.168285158	0.298050345
35.66905005	1.597478407	0.936758896	232.6088192	52.45032388	20.21988778	0.168322696	0.298487431
35.73033708	1.597841902	0.936967137	232.8981654	52.46199294	20.22450403	0.168360188	0.298924189
35.79162411	1.598204957	0.937175123	233.187152	52.47364773	20.2291147	0.168397634	0.29936062
35.85291113	1.598567573	0.937382855	233.4757793	52.48528828	20.2337198	0.168435035	0.299796723
35.91419816	1.598929751	0.937590332	233.7640478	52.49691461	20.23831935	0.16847239	0.300232501
35.97548519	1.599291492	0.937797556	234.051958	52.50852676	20.24291334	0.168509699	0.300667951
36.03677222	1.599652796	0.938004526	234.3395101	52.52012473	20.24750179	0.168546963	0.301103075
36.09805924	1.600013665	0.938211243	234.6267048	52.53170855	20.25208472	0.168584181	0.301537873
36.15934627	1.600374098	0.938417707	234.9135424	52.54327825	20.25666212	0.168621354	0.301972345
36.2206333	1.600734031	0.938623896	235.2000253	52.55483222	20.26123317	0.168658476	0.30240649
36.28192033	1.601093432	0.938829797	235.4861547	52.56636966	20.26579747	0.168695545	0.302840309
36.34320735	1.601452392	0.939035444	235.7719287	52.57789283	20.27035617	0.168732568	0.303273803
36.40449438	1.601810911	0.939240837	236.0573476	52.58940175	20.27490927	0.168769546	0.30370697
36.46578141	1.60216899	0.939445976	236.3424119	52.60089643	20.27945678	0.168806477	0.304139813
36.52706844	1.602526628	0.939650861	236.6271221	52.61237689	20.28399872	0.168843363	0.30457233
36.58835546	1.602883828	0.939855493	236.9114784	52.62384315	20.28853508	0.168880204	0.305004522
36.64964249	1.60324059	0.940059871	237.1954815	52.63529524	20.29306588	0.168916999	0.30543639
36.71092952	1.603596913	0.940263998	237.4791317	52.64673316	20.29759112	0.168953748	0.305867932
36.77221655	1.603952799	0.940467872	237.7624295	52.65815695	20.30211081	0.168990452	0.30629915
36.83350358	1.604308249	0.940671494	238.0453752	52.6695666	20.30662496	0.16902711	0.306730044
36.8947906	1.604663262	0.940874864	238.3279695	52.68096215	20.31113357	0.169063724	0.307160614
36.95607763	1.60501784	0.941077983	238.6102126	52.69234362	20.31563666	0.169100292	0.307590859
37.01736466	1.605371983	0.941280851	238.892105	52.70371101	20.32013423	0.169136814	0.308020781
37.07865169	1.605725692	0.941483468	239.1736471	52.71506436	20.32462629	0.169173292	0.308450379
37.13993871	1.606078967	0.941685835	239.4548394	52.72640367	20.32911284	0.169209725	0.308879653
37.20122574	1.606431809	0.941887952	239.7356824	52.73772897	20.3335939	0.169246112	0.309308604
37.26251277	1.606784219	0.94208982	240.0161764	52.74904028	20.33806947	0.169282455	0.309737232
37.3237998	1.607136197	0.942291438	240.2963218	52.76033761	20.34253956	0.169318752	0.310165537
37.38508682	1.607487743	0.942492807	240.5761192	52.77162098	20.34700418	0.169355005	0.310593519
37.44637385	1.607838859	0.942693927	240.8555689	52.78289042	20.35146333	0.169391213	0.311021178
37.50766088	1.608189545	0.942894799	241.1346714	52.79414593	20.35591702	0.169427376	0.311448514
37.56894791	1.608539801	0.943095422	241.4134271	52.80538755	20.36036527	0.169463495	0.311875528
37.63023493	1.608889628	0.943295798	241.6918364	52.81661528	20.36480807	0.169499569	0.31230222
37.69152196	1.609239028	0.943495927	241.9698997	52.82782915	20.36924544	0.169535599	0.31272859
37.75280899	1.609587999	0.943695809	242.2476175	52.83902917	20.37367738	0.169571584	0.313154638
37.81409602	1.609936544	0.943895444	242.5249902	52.85021536	20.3781039	0.169607524	0.313580365
37.87538304	1.610284662	0.944094832	242.8020183	52.86138775	20.38252502	0.16964342	0.314005769
37.93667007	1.610632355	0.944293974	243.0787021	52.87254634	20.38694073	0.169679272	0.314430853
37.9979571	1.610979622	0.944492871	243.3550421	52.88369117	20.39135105	0.16971508	0.314855615
38.05924413	1.611326465	0.944691522	243.6310387	52.89482224	20.39575597	0.169750844	0.315280056
38.12053115	1.611672884	0.944889928	243.9066923	52.90593958	20.40015552	0.169786563	0.315704176
38.18181818	1.612018879	0.945088089	244.1820034	52.9170432	20.4045497	0.169822238	0.316127975
38.24310521	1.612364452	0.945286006	244.4569723	52.92813313	20.40893852	0.16985787	0.316551454
38.30439224	1.612709603	0.945483678	244.7315996	52.93920938	20.41332197	0.169893457	0.316974613
38.36567926	1.613054333	0.945681107	245.0058855	52.95027197	20.41770009	0.169929	0.317397451
38.42696629	1.613398641	0.945878292	245.2798306	52.96132091	20.42207286	0.1699645	0.317819969
38.48825332	1.61374253	0.946075234	245.5534352	52.97235624	20.4264403	0.169999956	0.318242167
38.54954035	1.614085999	0.946271934	245.8266998	52.98337796	20.43080241	0.170035368	0.318664046
38.61082737	1.614429048	0.94646839	246.0996248	52.9943861	20.43515921	0.170070737	0.319085605
38.6721144	1.61477168	0.946664605	246.3722106	53.00538067	20.4395107	0.170106062	0.319506845
38.73340143	1.615113894	0.946860578	246.6444576	53.0163617	20.4438569	0.170141343	0.319927765
38.79468846	1.615455691	0.947056309	246.9163663	53.02732919	20.44819779	0.170176581	0.320348366
38.85597549	1.615797071	0.947251799	247.187937	53.03828318	20.45253341	0.170211776	0.320768649
38.91726251	1.616138035	0.947447048	247.4591702	53.04922367	20.45686375	0.170246927	0.321188612
38.97854954	1.616478585	0.947642056	247.7300663	53.06015069	20.46118882	0.170282035	0.321608258
39.03983657	1.61681872	0.947836824	248.0006257	53.07106425	20.46550863	0.170317099	0.322027584
39.1011236	1.61715844	0.948031353	248.2708488	53.08196439	20.46982319	0.170352121	0.322446593
39.16241062	1.617497748	0.948225641	248.540736	53.0928511	20.47413251	0.170387099	0.322865283
39.22369765	1.617836643	0.948419691	248.8102877	53.10372441	20.47843659	0.170422035	0.323283656
39.28498468	1.618175126	0.948613501	249.0795044	53.11458435	20.48273544	0.170456927	0.323701711
39.34627171	1.618513197	0.948807073	249.3483865	53.12543092	20.48702907	0.170491777	0.324119448
39.40755873	1.618850858	0.949000407	249.6169343	53.13626416	20.49131749	0.170526583	0.324536868
39.46884576	1.619188108	0.949193502	249.8851483	53.14708407	20.49560071	0.170561347	0.324953971
39.53013279	1.619524949	0.94938636	250.1530289	53.15789067	20.49987873	0.170596068	0.325370757
39.59141982	1.619861381	0.949578981	250.4205765	53.16868399	20.50415157	0.170630747	0.325787226
39.65270684	1.620197405	0.949771365	250.6877914	53.17946404	20.50841922	0.170665382	0.326203378
39.71399387	1.620533022	0.949963512	250.9546742	53.19023084	20.51268171	0.170699976	0.326619214
39.7752809	1.620868231	0.950155422	251.2212252	53.20098441	20.51693903	0.170734526	0.327034733
39.83656793	1.621203034	0.950347097	251.4874448	53.21172477	20.5211912	0.170769034	0.327449936
39.89785495	1.621537432	0.950538536	251.7533335	53.22245194	20.52543822	0.1708035	0.327864823
39.95914198	1.621871424	0.950729739	252.0188916	53.23316594	20.5296801	0.170837924	0.328279394
40.02042901	1.622205012	0.950920708	252.2841195	53.24386678	20.53391686	0.170872305	0.32869365
40.08171604	1.622538197	0.951111442	252.5490176	53.25455448	20.53814849	0.170906644	0.32910759
40.14300306	1.622870978	0.951301941	252.8135864	53.26522907	20.54237501	0.170940941	0.329521215
40.20429009	1.623203357	0.951492206	253.0778262	53.27589055	20.54659642	0.170975196	0.329934524
40.26557712	1.623535334	0.951682238	253.3417374	53.28653896	20.55081273	0.171009409	0.330347519
40.32686415	1.62386691	0.951872036	253.6053205	53.2971743	20.55502396	0.17104358	0.330760199
40.38815117	1.624198086	0.952061601	253.8685758	53.3077966	20.55923011	0.171077709	0.331172564
40.4494382	1.624528861	0.952250933	254.1315038	53.31840588	20.56343118	0.171111796	0.331584614
40.51072523	1.624859114	0.952440005	254.3941102	53.32900015	20.56762557	0.171145835	0.331996348
40.57201226	1.625188948	0.95262884	254.6563908	53.33958111	20.57181464	0.171179831	0.332407767
40.63329928	1.625518378	0.952817441	254.9183456	53.35014899	20.57599857	0.171213785	0.332818873
40.69458631	1.625847403	0.953005809	255.1799749	53.3607038	20.58017737	0.171247697	0.333229664
40.75587334	1.626176023	0.953193944	255.4412792	53.37124556	20.58435103	0.171281567	0.333640141
40.81716037	1.62650424	0.953381847	255.7022588	53.38177428	20.58851957	0.171315395	0.334050305
40.8784474	1.626832054	0.953569517	255.9629143	53.39228997	20.59268299	0.171349182	0.334460156
40.93973442	1.627159464	0.953756956	256.2232458	53.40279266	20.5968413	0.171382926	0.334869693
41.00102145	1.627486473	0.953944162	256.483254	53.41328236	20.6009945	0.171416629	0.335278917
41.06230848	1.627813079	0.954131137	256.7429391	53.42375908	20.6051426	0.17145029	0.335687828
41.12359551	1.628139284	0.954317881	257.0023015	53.43422284	20.6092856	0.17148391	0.336096426
41.18488253	1.628465089	0.954504393	257.2613418	53.44467366	20.61342351	0.171517488	0.336504712
41.24616956	1.628790492	0.954690675	257.5200602	53.45511155	20.61755635	0.171551024	0.336912685
41.30745659	1.629115496	0.954876727	257.7784571	53.46553654	20.6216841	0.171584519	0.337320346
41.36874362	1.629440101	0.955062549	258.036533	53.47594862	20.62580679	0.171617973	0.337727695
41.43003064	1.629764306	0.95524814	258.2942883	53.48634782	20.62992441	0.171651385	0.338134732
41.49131767	1.630088113	0.955433503	258.5517233	53.49673416	20.63403697	0.171684756	0.338541457
41.5526047	1.630411522	0.955618636	258.8088385	53.50710766	20.63814448	0.171718085	0.33894787
41.61389173	1.630734534	0.955803539	259.0656342	53.51746831	20.64224695	0.171751374	0.339353973
41.67517875	1.631057148	0.955988215	259.3221108	53.52781616	20.64634437	0.171784621	0.339759763
41.73646578	1.631379366	0.956172662	259.5782688	53.53815119	20.65043676	0.171817827	0.340165243
41.79775281	1.631701187	0.95635688	259.8341085	53.54847345	20.65452411	0.171850992	0.340570412
41.85903984	1.632022613	0.956540871	260.0896303	53.55878293	20.65860645	0.171884116	0.34097527
41.92032686	1.632343644	0.956724634	260.3448346	53.56907966	20.66268377	0.171917198	0.341379818
41.98161389	1.632664279	0.95690817	260.5997219	53.57936365	20.66675608	0.17195024	0.341784055
42.04290092	1.632984521	0.957091479	260.8542924	53.58963491	20.67082338	0.171983242	0.342187982
42.10418795	1.633304369	0.957274561	261.1085466	53.59989347	20.67488569	0.172016202	0.342591599
42.16547497	1.633623823	0.957457416	261.3624849	53.61013933	20.678943	0.172049121	0.342994906
42.226762	1.633942885	0.957640046	261.6161077	53.62037251	20.68299532	0.172082	0.343397903
42.28804903	1.634261554	0.957822449	261.8694153	53.63059304	20.68704267	0.172114838	0.343800591
42.34933606	1.634579832	0.958004627	262.1224081	53.64080091	20.69108503	0.172147636	0.344202969
42.41062308	1.634897717	0.958186579	262.3750866	53.65099616	20.69512243	0.172180392	0.344605038
42.47191011	1.635215212	0.958368306	262.6274511	53.66117879	20.69915487	0.172213109	0.345006799
42.53319714	1.635532317	0.958549808	262.879502	53.67134882	20.70318234	0.172245785	0.34540825
42.59448417	1.635849031	0.958731086	263.1312398	53.68150626	20.70720487	0.17227842	0.345809392
42.6557712	1.636165355	0.958912139	263.3826646	53.69165113	20.71122245	0.172311015	0.346210226
42.71705822	1.636481291	0.959092968	263.6337771	53.70178345	20.71523508	0.17234357	0.346610752
42.77834525	1.636796837	0.959273574	263.8845775	53.71190323	20.71924279	0.172376084	0.347010969
42.83963228	1.637111996	0.959453956	264.1350662	53.72201049	20.72324556	0.172408558	0.347410878
42.90091931	1.637426767	0.959634115	264.3852436	53.73210524	20.72724341	0.172440992	0.34781048
42.96220633	1.63774115	0.95981405	264.6351102	53.74218749	20.73123634	0.172473386	0.348209774
43.02349336	1.638055146	0.959993764	264.8846662	53.75225726	20.73522437	0.17250574	0.34860876
43.08478039	1.638368757	0.960173254	265.133912	53.76231457	20.73920748	0.172538053	0.349007439
43.14606742	1.638681981	0.960352523	265.3828482	53.77235944	20.7431857	0.172570327	0.349405811
43.20735444	1.638994819	0.960531569	265.6314749	53.78239186	20.74715902	0.172602561	0.349803876
43.26864147	1.639307273	0.960710394	265.8797927	53.79241187	20.75112746	0.172634754	0.350201634
43.3299285	1.639619342	0.960888998	266.1278018	53.80241948	20.75509101	0.172666908	0.350599085
43.39121553	1.639931027	0.96106738	266.3755027	53.8124147	20.75904968	0.172699023	0.35099623
43.45250255	1.640242328	0.961245542	266.6228957	53.82239755	20.76300349	0.172731097	0.351393069
43.51378958	1.640553246	0.961423483	266.8699813	53.83236804	20.76695242	0.172763132	0.351789601
43.57507661	1.640863781	0.961601204	267.1167597	53.84232618	20.7708965	0.172795127	0.352185827
43.63636364	1.641173934	0.961778704	267.3632314	53.852272	20.77483572	0.172827082	0.352581748
43.69765066	1.641483705	0.961955985	267.6093968	53.8622055	20.7787701	0.172858998	0.352977363
43.75893769	1.641793094	0.962133047	267.8552562	53.87212671	20.78269963	0.172890874	0.353372673
43.82022472	1.642102103	0.962309889	268.10081	53.88203563	20.78662433	0.172922711	0.353767677
43.88151175	1.64241073	0.962486512	268.3460586	53.89193228	20.79054419	0.172954509	0.354162376
43.94279877	1.642718978	0.962662917	268.5910023	53.90181668	20.79445923	0.172986267	0.354556771
44.0040858	1.643026846	0.962839103	268.8356415	53.91168884	20.79836944	0.173017986	0.35495086
44.06537283	1.643334335	0.96301507	269.0799766	53.92154878	20.80227484	0.173049665	0.355344645
44.12665986	1.643641446	0.96319082	269.324008	53.93139651	20.80617544	0.173081305	0.355738125
44.18794688	1.643948177	0.963366353	269.567736	53.94123204	20.81007123	0.173112906	0.356131302
44.24923391	1.644254531	0.963541667	269.8111611	53.95105539	20.81396222	0.173144468	0.356524174
44.31052094	1.644560508	0.963716765	270.0542835	53.96086657	20.81784842	0.173175991	0.356916742
44.37180797	1.644866108	0.963891646	270.2971037	53.97066561	20.82172983	0.173207475	0.357309007
44.43309499	1.645171331	0.96406631	270.5396219	53.98045251	20.82560646	0.17323892	0.357700968
44.49438202	1.645476177	0.964240757	270.7818387	53.99022729	20.82947832	0.173270326	0.358092625
44.55566905	1.645780649	0.964414989	271.0237543	53.99998996	20.8333454	0.173301693	0.35848398
44.61695608	1.646084745	0.964589005	271.2653692	54.00974054	20.83720772	0.173333021	0.358875031
44.67824311	1.646388466	0.964762805	271.5066836	54.01947904	20.84106528	0.17336431	0.35926578
44.73953013	1.646691813	0.96493639	271.7477	54.02920547	20.8449181	0.173395561	0.359656224
44.80081716	1.646994788	0.965109762	271.9884198	54.03891986	20.8487662	0.173426773	0.360046365
44.86210419	1.647297388	0.965282919	272.2288406	54.0486222	20.85260955	0.173457946	0.360436202
44.92339122	1.647599616	0.965455862	272.4689627	54.05831253	20.85644817	0.17348908	0.360825738
44.98467824	1.647901472	0.965628591	272.7087865	54.06799086	20.86028206	0.173520176	0.361214971
45.04596527	1.648202955	0.965801105	272.9483123	54.07765719	20.86411122	0.173551234	0.361603902
45.1072523	1.648504067	0.965973406	273.1875406	54.08731154	20.86793567	0.173582253	0.361992531
45.16853933	1.648804807	0.966145493	273.4264717	54.09695393	20.8717554	0.173613233	0.362380859
45.22982635	1.649105177	0.966317368	273.665106	54.10658438	20.87557043	0.173644176	0.362768885
45.29111338	1.649405176	0.966489029	273.9034438	54.11620289	20.87938075	0.173675079	0.36315661
45.35240041	1.649704805	0.966660478	274.1414855	54.12580948	20.88318638	0.173705945	0.363544034
45.41368744	1.650004065	0.966831714	274.3792314	54.13540417	20.88698731	0.173736772	0.363931157
45.47497446	1.650302956	0.967002738	274.6166821	54.14498696	20.89078356	0.173767561	0.364317979
45.53626149	1.650601478	0.96717355	274.8538377	54.15455788	20.89457513	0.173798312	0.364704501
45.59754852	1.650899631	0.96734415	275.0906987	54.16411693	20.89836202	0.173829025	0.365090721
45.65883555	1.651197417	0.96751454	275.3272654	54.17366414	20.90214424	0.1738597	0.365476642
45.72012257	1.651494836	0.967684717	275.5635382	54.18319951	20.9059218	0.173890337	0.365862263
45.7814096	1.651791888	0.967854685	275.7995175	54.19272307	20.90969471	0.173920935	0.366247583
45.84269663	1.652088573	0.968024441	276.0352036	54.20223481	20.91346295	0.173951496	0.366632604
45.90398366	1.652384892	0.968193987	276.270597	54.21173477	20.91722655	0.173982019	0.367017325
45.96527068	1.652680845	0.968363323	276.5056978	54.22122295	20.92098551	0.174012504	0.367401747
46.02655771	1.652976434	0.968532449	276.7405066	54.23069936	20.92473983	0.174042951	0.36778587
46.08784474	1.653271657	0.968701365	276.9750236	54.24016403	20.92848952	0.174073361	0.368169693
46.14913177	1.653566516	0.968870072	277.2092493	54.24961696	20.93223458	0.174103733	0.368553217
46.21041879	1.653861011	0.96903857	277.443184	54.25905816	20.93597502	0.174134067	0.368936443
46.27170582	1.654155142	0.969206859	277.6768281	54.26848766	20.93971084	0.174164363	0.36931937
46.33299285	1.654448911	0.969374939	277.9101818	54.27790547	20.94344206	0.174194622	0.369701999
46.39427988	1.654742316	0.969542811	278.1432456	54.2873116	20.94716867	0.174224844	0.370084329
46.45556691	1.65503536	0.969710475	278.3760199	54.29670606	20.95089067	0.174255028	0.370466362
46.51685393	1.655328041	0.969877931	278.6085049	54.30608887	20.95460809	0.174285174	0.370848096
46.57814096	1.655620361	0.970045179	278.8407011	54.31546004	20.95832091	0.174315283	0.371229533
46.63942799	1.65591232	0.97021222	279.0726088	54.32481958	20.96202916	0.174345355	0.371610672
46.70071502	1.656203918	0.970379054	279.3042284	54.33416752	20.96573282	0.17437539	0.371991514
46.76200204	1.656495156	0.970545681	279.5355602	54.34350386	20.96943191	0.174405387	0.372372059
46.82328907	1.656786035	0.970712101	279.7666045	54.35282861	20.97312643	0.174435347	0.372752306
46.8845761	1.657076554	0.970878315	279.9973618	54.3621418	20.97681638	0.17446527	0.373132257
46.94586313	1.657366714	0.971044323	280.2278324	54.37144343	20.98050178	0.174495155	0.373511911
47.00715015	1.657656515	0.971210124	280.4580165	54.38073352	20.98418263	0.174525004	0.373891269
47.06843718	1.657945959	0.97137572	280.6879147	54.39001208	20.98785893	0.174554816	0.37427033
47.12972421	1.658235044	0.971541111	280.9175272	54.39927913	20.99153069	0.17458459	0.374649095
47.19101124	1.658523772	0.971706296	281.1468544	54.40853467	20.99519791	0.174614328	0.375027564
47.25229826	1.658812144	0.971871277	281.3758967	54.41777873	20.9988606	0.174644029	0.375405737
47.31358529	1.659100159	0.972036052	281.6046543	54.42701132	21.00251876	0.174673692	0.375783614
47.37487232	1.659387817	0.972200624	281.8331277	54.43623244	21.00617241	0.174703319	0.376161196
47.43615935	1.65967512	0.972364991	282.0613172	54.44544212	21.00982153	0.17473291	0.376538482
47.49744637	1.659962068	0.972529154	282.2892231	54.45464036	21.01346615	0.174762463	0.376915474
47.5587334	1.660248661	0.972693113	282.5168458	54.46382719	21.01710626	0.17479198	0.37729217
47.62002043	1.6605349	0.972856869	282.7441857	54.47300261	21.02074186	0.17482146	0.377668572
47.68130746	1.660820784	0.973020422	282.9712431	54.48216663	21.02437298	0.174850904	0.378044679
47.74259448	1.661106315	0.973183771	283.1980183	54.49131928	21.0279996	0.174880311	0.378420491
47.80388151	1.661391493	0.973346918	283.4245116	54.50046056	21.03162174	0.174909681	0.37879601
47.86516854	1.661676317	0.973509862	283.6507235	54.50959049	21.03523939	0.174939015	0.379171234
47.92645557	1.66196079	0.973672604	283.8766543	54.51870908	21.03885257	0.174968313	0.379546164
47.98774259	1.66224491	0.973835144	284.1023043	54.52781634	21.04246129	0.174997574	0.3799208
48.04902962	1.662528678	0.973997482	284.3276739	54.5369123	21.04606553	0.175026799	0.380295143
48.11031665	1.662812096	0.974159619	284.5527634	54.54599695	21.04966532	0.175055987	0.380669192
48.17160368	1.663095162	0.974321554	284.7775731	54.55507031	21.05326065	0.17508514	0.381042948
48.2328907	1.663377878	0.974483288	285.0021035	54.56413241	21.05685153	0.175114256	0.381416411
48.29417773	1.663660244	0.974644821	285.2263548	54.57318324	21.06043797	0.175143336	0.381789581
48.35546476	1.663942261	0.974806154	285.4503274	54.58222283	21.06401997	0.175172379	0.382162458
48.41675179	1.664223928	0.974967286	285.6740216	54.59125118	21.06759753	0.175201387	0.382535043
48.47803882	1.664505246	0.975128218	285.8974377	54.60026832	21.07117066	0.175230359	0.382907335
48.53932584	1.664786216	0.97528895	286.1205762	54.60927425	21.07473937	0.175259294	0.383279336
48.60061287	1.665066838	0.975449483	286.3434373	54.61826898	21.07830366	0.175288194	0.383651044
48.6618999	1.665347112	0.975609816	286.5660215	54.62725253	21.08186354	0.175317058	0.38402246
48.72318693	1.665627039	0.975769949	286.7883289	54.63622492	21.085419	0.175345885	0.384393584
48.78447395	1.665906619	0.975929884	287.01036	54.64518615	21.08897006	0.175374677	0.384764417
48.84576098	1.666185852	0.97608962	287.2321152	54.65413624	21.09251672	0.175403434	0.385134958
48.90704801	1.66646474	0.976249157	287.4535947	54.6630752	21.09605899	0.175432154	0.385505209
48.96833504	1.666743281	0.976408496	287.6747988	54.67200305	21.09959686	0.175460839	0.385875168
49.02962206	1.667021524	0.976567653	287.8957347	54.68092073	21.10313096	0.175489491	0.386244833
49.09090909	1.66729943	0.976726615	288.116397	54.68982746	21.10666078	0.175518108	0.386614206
49.15219612	1.667576993	0.97688538	288.3367853	54.69872317	21.11018626	0.175546689	0.386983289
49.21348315	1.667854214	0.977043948	288.5569	54.70760786	21.11370739	0.175575235	0.387352082
49.27477017	1.668131094	0.97720232	288.7767414	54.71648154	21.11722419	0.175603746	0.387720584
49.3360572	1.668407633	0.977360495	288.9963099	54.72534423	21.12073666	0.175632221	0.388088795
49.39734423	1.668683832	0.977518475	289.2156057	54.73419595	21.12424481	0.175660662	0.388456717
49.45863126	1.66895969	0.97767626	289.4346292	54.74303671	21.12774864	0.175689066	0.388824349
49.51991828	1.669235208	0.977833849	289.6533808	54.75186651	21.13124816	0.175717436	0.389191691
49.58120531	1.669510388	0.977991242	289.8718608	54.76068538	21.13474337	0.175745771	0.389558744
49.64249234	1.669785228	0.978148441	290.0900695	54.76949332	21.13823427	0.17577407	0.389925508
49.70377937	1.67005973	0.978305445	290.3080073	54.77829036	21.14172088	0.175802335	0.390291982
49.76506639	1.670333894	0.978462255	290.5256745	54.7870765	21.1452032	0.175830564	0.390658168
49.82635342	1.67060772	0.978618871	290.7430714	54.79585176	21.14868123	0.175858759	0.391024064
49.88764045	1.670881209	0.978775293	290.9601984	54.80461614	21.15215498	0.175886918	0.391389672
49.94892748	1.671154361	0.978931521	291.1770558	54.81336967	21.15562446	0.175915043	0.391754992
50.0102145	1.671427177	0.979087555	291.3936439	54.82211236	21.15908966	0.175943133	0.392120023
50.07150153	1.671699656	0.979243396	291.6099631	54.83084422	21.1625506	0.175971188	0.392484766
50.13278856	1.671971801	0.979399045	291.8260137	54.83956526	21.16600728	0.175999208	0.392849221
50.19407559	1.67224361	0.9795545	292.0417961	54.8482755	21.1694597	0.176027194	0.393213388
50.25536261	1.672515084	0.979709763	292.2573105	54.85697495	21.17290787	0.176055144	0.393577268
50.31664964	1.672786224	0.979864834	292.4725573	54.86566362	21.1763518	0.176083061	0.393940861
50.37793667	1.67305703	0.980019713	292.6875369	54.87434153	21.17979149	0.176110942	0.394304166
50.4392237	1.673327502	0.980174399	292.9022495	54.88300869	21.18322694	0.17613879	0.394667184
50.50051073	1.673597641	0.980328895	293.1166955	54.89166511	21.18665817	0.176166602	0.395029915
50.56179775	1.673867448	0.980483199	293.3308752	54.90031081	21.19008517	0.17619438	0.395392359
50.62308478	1.674136922	0.980637311	293.544789	54.90894579	21.19350795	0.176222124	0.395754517
50.68437181	1.674406065	0.980791233	293.7584372	54.91757008	21.19692652	0.176249834	0.396116388
50.74565884	1.674674875	0.980944964	293.9718201	54.92618368	21.20034088	0.176277509	0.396477973
50.80694586	1.674943355	0.981098505	294.1849379	54.93478661	21.20375104	0.176305149	0.396839272
50.86823289	1.675211504	0.981251856	294.3977912	54.94337888	21.207157	0.176332756	0.397200285
50.92951992	1.675479323	0.981405017	294.6103801	54.9519605	21.21055876	0.176360328	0.397561012
50.99080695	1.675746812	0.981557988	294.8227051	54.96053149	21.21395634	0.176387867	0.397921454
51.05209397	1.676013972	0.981710769	295.0347664	54.96909186	21.21734974	0.176415371	0.398281611
51.113381	1.676280802	0.981863361	295.2465643	54.97764163	21.22073896	0.176442841	0.398641482
51.17466803	1.676547304	0.982015764	295.4580993	54.98618079	21.224124	0.176470276	0.399001068
51.23595506	1.676813477	0.982167979	295.6693715	54.99470938	21.22750488	0.176497678	0.39936037
51.29724208	1.677079323	0.982320005	295.8803814	55.0032274	21.23088159	0.176525046	0.399719386
51.35852911	1.677344841	0.982471842	296.0911292	55.01173486	21.23425415	0.17655238	0.400078118
51.41981614	1.677610032	0.982623491	296.3016153	55.02023177	21.23762256	0.176579681	0.400436566
51.48110317	1.677874896	0.982774953	296.51184	55.02871816	21.24098681	0.176606947	0.40079473
51.54239019	1.678139434	0.982926227	296.7218037	55.03719403	21.24434693	0.176634179	0.401152609
51.60367722	1.678403646	0.983077313	296.9315065	55.04565939	21.24770291	0.176661378	0.401510205
51.66496425	1.678667533	0.983228212	297.140949	55.05411426	21.25105476	0.176688543	0.401867517
51.72625128	1.678931094	0.983378924	297.3501313	55.06255865	21.25440248	0.176715675	0.402224546
51.7875383	1.679194331	0.98352945	297.5590538	55.07099258	21.25774607	0.176742772	0.402581291
51.84882533	1.679457243	0.983679788	297.7677168	55.07941604	21.26108555	0.176769837	0.402937754
51.91011236	1.679719832	0.983829941	297.9761207	55.08782907	21.26442092	0.176796867	0.403293933
51.97139939	1.679982097	0.983979907	298.1842657	55.09623167	21.26775218	0.176823864	0.403649829
52.03268641	1.680244039	0.984129688	298.3921522	55.10462385	21.27107934	0.176850828	0.404005443
52.09397344	1.680505658	0.984279283	298.5997804	55.11300563	21.2744024	0.176877758	0.404360774
52.15526047	1.680766955	0.984428693	298.8071508	55.12137701	21.27772137	0.176904655	0.404715824
52.2165475	1.68102793	0.984577917	299.0142636	55.12973802	21.28103625	0.176931519	0.405070591
52.27783453	1.681288583	0.984726956	299.2211191	55.13808865	21.28434705	0.176958349	0.405425076
52.33912155	1.681548915	0.984875811	299.4277177	55.14642894	21.28765377	0.176985146	0.405779279
52.40040858	1.681808926	0.985024481	299.6340597	55.15475888	21.29095642	0.177011909	0.406133201
52.46169561	1.682068617	0.985172967	299.8401453	55.16307849	21.294255	0.17703864	0.406486841
52.52298264	1.682327988	0.985321269	300.0459749	55.17138779	21.29754952	0.177065337	0.4068402
52.58426966	1.682587039	0.985469387	300.2515488	55.17968678	21.30083998	0.177092001	0.407193278
52.64555669	1.682845771	0.985617321	300.4568674	55.18797548	21.30412639	0.177118633	0.407546075
52.70684372	1.683104184	0.985765072	300.6619308	55.1962539	21.30740875	0.177145231	0.407898591
52.76813075	1.683362278	0.98591264	300.8667395	55.20452205	21.31068707	0.177171796	0.408250827
52.82941777	1.683620055	0.986060024	301.0712938	55.21277995	21.31396134	0.177198328	0.408602782
52.8907048	1.683877513	0.986207226	301.2755939	55.2210276	21.31723159	0.177224827	0.408954458
52.95199183	1.684134655	0.986354246	301.4796401	55.22926502	21.3204978	0.177251294	0.409305853
53.01327886	1.684391479	0.986501083	301.6834329	55.23749222	21.32376	0.177277727	0.409656968
53.07456588	1.684647987	0.986647738	301.8869724	55.24570922	21.32701817	0.177304128	0.410007804
53.13585291	1.684904178	0.986794211	302.090259	55.25391602	21.33027233	0.177330496	0.41035836
53.19713994	1.685160054	0.986940502	302.2932931	55.26211264	21.33352248	0.177356831	0.410708637
53.25842697	1.685415615	0.987086612	302.4960748	55.27029909	21.33676863	0.177383134	0.411058634
53.31971399	1.68567086	0.987232541	302.6986046	55.27847538	21.34001077	0.177409404	0.411408353
53.38100102	1.68592579	0.987378289	302.9008826	55.28664153	21.34324892	0.177435641	0.411757793
53.44228805	1.686180407	0.987523856	303.1029093	55.29479754	21.34648308	0.177461846	0.412106954
53.50357508	1.686434709	0.987669242	303.304685	55.30294343	21.34971326	0.177488019	0.412455837
53.5648621	1.686688698	0.987814448	303.5062099	55.31107921	21.35293946	0.177514158	0.412804441
53.62614913	1.686942373	0.987959474	303.7074843	55.31920489	21.35616167	0.177540266	0.413152767
53.68743616	1.687195736	0.98810432	303.9085085	55.32732049	21.35937992	0.177566341	0.413500816
53.74872319	1.687448786	0.988248986	304.1092829	55.33542601	21.3625942	0.177592383	0.413848586
53.81001021	1.687701524	0.988393473	304.3098078	55.34352147	21.36580453	0.177618394	0.414196079
53.87129724	1.687953951	0.988537781	304.5100834	55.35160688	21.36901089	0.177644372	0.414543295
53.93258427	1.688206066	0.988681909	304.7101101	55.35968225	21.3722133	0.177670317	0.414890233
53.9938713	1.68845787	0.988825858	304.9098881	55.3677476	21.37541176	0.177696231	0.415236894
54.05515832	1.688709364	0.988969629	305.1094177	55.37580293	21.37860629	0.177722112	0.415583278
54.11644535	1.688960547	0.989113221	305.3086994	55.38384826	21.38179687	0.177747962	0.415929386
54.17773238	1.689211421	0.989256635	305.5077333	55.3918836	21.38498352	0.177773779	0.416275217
54.23901941	1.689461985	0.989399872	305.7065197	55.39990896	21.38816624	0.177799564	0.416620771
54.30030644	1.68971224	0.98954293	305.905059	55.40792436	21.39134504	0.177825317	0.41696605
54.36159346	1.689962186	0.98968581	306.1033514	55.41592979	21.39451992	0.177851038	0.417311052
54.42288049	1.690211824	0.989828514	306.3013973	55.42392529	21.39769088	0.177876727	0.417655779
54.48416752	1.690461154	0.98997104	306.499197	55.43191085	21.40085793	0.177902384	0.418000229
54.54545455	1.690710176	0.990113389	306.6967506	55.43988649	21.40402108	0.177928009	0.418344405
54.60674157	1.690958891	0.990255561	306.8940587	55.44785222	21.40718033	0.177953603	0.418688305
54.6680286	1.691207299	0.990397557	307.0911213	55.45580806	21.41033568	0.177979164	0.419031929
54.72931563	1.6914554	0.990539376	307.2879389	55.46375401	21.41348714	0.178004694	0.419375279
54.79060266	1.691703195	0.990681019	307.4845117	55.47169009	21.41663471	0.178030192	0.419718354
54.85188968	1.691950685	0.990822487	307.68084	55.4796163	21.4197784	0.178055659	0.420061154
54.91317671	1.692197869	0.990963778	307.8769241	55.48753266	21.42291821	0.178081094	0.42040368
54.97446374	1.692444747	0.991104894	308.0727644	55.49543919	21.42605415	0.178106497	0.420745932
55.03575077	1.692691321	0.991245835	308.268361	55.50333589	21.42918622	0.178131869	0.421087909
55.09703779	1.692937591	0.9913866	308.4637143	55.51122277	21.43231443	0.178157209	0.421429613
55.15832482	1.693183556	0.991527191	308.6588246	55.51909984	21.43543877	0.178182517	0.421771042
55.21961185	1.693429218	0.991667607	308.8536922	55.52696712	21.43855926	0.178207795	0.422112198
55.28089888	1.693674577	0.991807848	309.0483173	55.53482462	21.44167591	0.17823304	0.422453081
55.3421859	1.693919632	0.991947916	309.2427003	55.54267235	21.4447887	0.178258255	0.422793691
55.40347293	1.694164385	0.992087809	309.4368414	55.55051032	21.44789766	0.178283438	0.423134027
55.46475996	1.694408836	0.992227528	309.630741	55.55833855	21.45100277	0.178308589	0.42347409
55.52604699	1.694652985	0.992367073	309.8243993	55.56615703	21.45410406	0.178333709	0.423813881
55.58733401	1.694896832	0.992506445	310.0178166	55.57396579	21.45720151	0.178358799	0.424153399
55.64862104	1.695140386	0.992645651	310.210999	55.58176525	21.46029524	0.178383858	0.424492642
55.70990807	1.695383655	0.992784698	310.4039534	55.58955588	21.46338533	0.178408889	0.424831607
55.7711951	1.695626624	0.992923573	310.5966683	55.59733686	21.46647162	0.178433889	0.425170299
55.83248212	1.695869295	0.993062276	310.789144	55.6051082	21.46955411	0.178458857	0.42550872
55.89376915	1.696111666	0.993200807	310.9813808	55.61286992	21.4726328	0.178483795	0.425846868
55.95505618	1.696353739	0.993339166	311.1733789	55.62062203	21.4757077	0.178508703	0.426184744
56.01634321	1.696595513	0.993477355	311.3651387	55.62836453	21.47877882	0.178533579	0.426522349
56.07763023	1.69683699	0.993615372	311.5566605	55.63609745	21.48184615	0.178558424	0.426859682
56.13891726	1.697078169	0.993753218	311.7479445	55.64382079	21.4849097	0.178583239	0.427196744
56.20020429	1.697319051	0.993890894	311.9389911	55.65153457	21.48796949	0.178608023	0.427533535
56.26149132	1.697559636	0.994028399	312.1298005	55.65923879	21.4910255	0.178632776	0.427870055
56.32277835	1.697799925	0.994165734	312.3203731	55.66693347	21.49407775	0.178657499	0.428206304
56.38406537	1.698039917	0.994302899	312.5107091	55.67461862	21.49712624	0.178682191	0.428542283
56.4453524	1.698279614	0.994439894	312.7008088	55.68229425	21.50017098	0.178706852	0.428877991
56.50663943	1.698519016	0.99457672	312.8906725	55.68996038	21.50321196	0.178731483	0.429213429
56.56792646	1.698758122	0.994713376	313.0803005	55.69761701	21.5062492	0.178756083	0.429548596
56.62921348	1.698996934	0.994849862	313.269693	55.70526416	21.5092827	0.178780653	0.429883494
56.69050051	1.699235452	0.99498618	313.4588505	55.71290184	21.51231246	0.178805193	0.430218122
56.75178754	1.699473676	0.995122329	313.6477731	55.72053006	21.51533849	0.178829702	0.43055248
56.81307457	1.699711606	0.99525831	313.8364612	55.72814883	21.5183608	0.17885418	0.430886569
56.87436159	1.699949243	0.995394122	314.024915	55.73575816	21.52137938	0.178878629	0.431220389
56.93564862	1.700186587	0.995529765	314.2131348	55.74335807	21.52439424	0.178903047	0.43155394
56.99693565	1.700423638	0.995665241	314.4011209	55.75094857	21.52740538	0.178927435	0.431887221
57.05822268	1.700660397	0.995800549	314.5888737	55.75852966	21.53041282	0.178951792	0.432220234
57.1195097	1.700896865	0.99593569	314.7763933	55.76610136	21.53341655	0.17897612	0.432552979
57.18079673	1.701133041	0.996070663	314.9636801	55.77366368	21.53641658	0.179000417	0.432885455
57.24208376	1.701368926	0.996205469	315.1507343	55.78121664	21.53941291	0.179024684	0.433217662
57.30337079	1.70160452	0.996340108	315.3375563	55.78876024	21.54240556	0.179048921	0.433549602
57.36465781	1.701839824	0.99647458	315.5241463	55.79629449	21.54539451	0.179073129	0.433881274
57.42594484	1.702074837	0.996608886	315.7105047	55.80381941	21.54837978	0.179097306	0.434212678
57.48723187	1.702309561	0.996743025	315.8966316	55.81133501	21.55136137	0.179121453	0.434543815
57.5485189	1.702543995	0.996876998	316.0825274	55.8188413	21.55433929	0.17914557	0.434874684
57.60980592	1.702778141	0.997010806	316.2681923	55.82633829	21.55731354	0.179169658	0.435205286
57.67109295	1.703011998	0.997144447	316.4536267	55.83382599	21.56028412	0.179193715	0.435535621
57.73237998	1.703245566	0.997277923	316.6388308	55.84130442	21.56325104	0.179217743	0.435865689
57.79366701	1.703478846	0.997411234	316.8238049	55.84877358	21.5662143	0.179241741	0.43619549
57.85495403	1.703711839	0.99754438	317.0085492	55.85623348	21.56917391	0.179265709	0.436525025
57.91624106	1.703944545	0.99767736	317.1930642	55.86368414	21.57212987	0.179289648	0.436854294
57.97752809	1.704176963	0.997810176	317.37735	55.87112558	21.57508219	0.179313557	0.437183296
58.03881512	1.704409095	0.997942827	317.5614068	55.87855779	21.57803087	0.179337436	0.437512033
58.10010215	1.70464094	0.998075314	317.7452351	55.88598079	21.58097591	0.179361286	0.437840503
58.16138917	1.7048725	0.998207637	317.9288351	55.89339459	21.58391732	0.179385106	0.438168708
58.2226762	1.705103774	0.998339796	318.112207	55.90079921	21.58685511	0.179408897	0.438496648
58.28396323	1.705334762	0.998471792	318.2953512	55.90819465	21.58978927	0.179432658	0.438824322
58.34525026	1.705565466	0.998603623	318.4782679	55.91558093	21.59271982	0.179456389	0.439151731
58.40653728	1.705795885	0.998735292	318.6609573	55.92295805	21.59564675	0.179480092	0.439478875
58.46782431	1.70602602	0.998866797	318.8434198	55.93032604	21.59857007	0.179503765	0.439805754
58.52911134	1.706255871	0.998998139	319.0256557	55.93768489	21.60148979	0.179527408	0.440132368
58.59039837	1.706485439	0.999129319	319.2076651	55.94503462	21.60440591	0.179551022	0.440458718
58.65168539	1.706714723	0.999260336	319.3894485	55.95237524	21.60731842	0.179574607	0.440784804
58.71297242	1.706943724	0.99939119	319.571006	55.95970676	21.61022735	0.179598163	0.441110626
58.77425945	1.707172443	0.999521883	319.7523379	55.9670292	21.61313269	0.17962169	0.441436184
58.83554648	1.707400879	0.999652413	319.9334446	55.97434256	21.61603444	0.179645187	0.441761478
58.8968335	1.707629034	0.999782782	320.1143262	55.98164686	21.61893262	0.179668656	0.442086508
58.95812053	1.707856906	0.999912989	320.2949831	55.9889421	21.62182722	0.179692095	0.442411275
59.01940756	1.708084498	1.000043035	320.4754155	55.9962283	21.62471825	0.179715505	0.442735779
59.08069459	1.708311809	1.00017292	320.6556237	56.00350547	21.62760571	0.179738886	0.443060019
59.14198161	1.708538839	1.000302644	320.835608	56.01077361	21.63048961	0.179762238	0.443383997
59.20326864	1.708765589	1.000432207	321.0153686	56.01803275	21.63336995	0.179785561	0.443707712
59.26455567	1.708992059	1.000561609	321.1949058	56.02528289	21.63624673	0.179808856	0.444031164
59.3258427	1.70921825	1.000690851	321.3742199	56.03252403	21.63911997	0.179832121	0.444354354
59.38712972	1.709444161	1.000819932	321.5533111	56.0397562	21.64198965	0.179855358	0.444677282
59.44841675	1.709669793	1.000948854	321.7321798	56.0469794	21.6448558	0.179878565	0.444999947
59.50970378	1.709895147	1.001077616	321.9108261	56.05419365	21.64771841	0.179901744	0.445322351
59.57099081	1.710120222	1.001206218	322.0892504	56.06139895	21.65057748	0.179924895	0.445644493
59.63227783	1.71034502	1.001334661	322.2674529	56.06859532	21.65343303	0.179948016	0.445966374
59.69356486	1.710569539	1.001462945	322.4454339	56.07578276	21.65628505	0.179971109	0.446287993
59.75485189	1.710793782	1.001591069	322.6231937	56.08296129	21.65913355	0.179994173	0.446609351
59.81613892	1.711017748	1.001719035	322.8007325	56.09013092	21.66197853	0.180017209	0.446930448
59.87742594	1.711241436	1.001846842	322.9780505	56.09729165	21.66482	0.180040216	0.447251284
59.93871297	1.711464849	1.00197449	323.1551481	56.10444351	21.66765796	0.180063194	0.447571859
60	1.711687986	1.002101981	323.3320255	56.11158649	21.67049241	0.180086144	0.447892174
60.06128703	1.711910847	1.002229313	323.508683	56.11872061	21.67332337	0.180109066	0.448212228
60.12257406	1.712133432	1.002356487	323.6851209	56.12584589	21.67615083	0.180131959	0.448532023
60.18386108	1.712355743	1.002483503	323.8613393	56.13296232	21.67897479	0.180154824	0.448851557
60.24514811	1.712577779	1.002610362	324.0373387	56.14006993	21.68179527	0.18017766	0.449170832
60.30643514	1.71279954	1.002737064	324.2131191	56.14716872	21.68461226	0.180200468	0.449489847
60.36772217	1.713021027	1.002863608	324.388681	56.1542587	21.68742577	0.180223248	0.449808602
60.42900919	1.713242241	1.002989996	324.5640245	56.16133989	21.6902358	0.180245999	0.450127098
60.49029622	1.713463181	1.003116226	324.7391499	56.16841229	21.69304237	0.180268723	0.450445335
60.55158325	1.713683848	1.003242301	324.9140575	56.17547592	21.69584546	0.180291418	0.450763313
60.61287028	1.713904242	1.003368218	325.0887475	56.18253078	21.69864509	0.180314085	0.451081032
60.6741573	1.714124364	1.00349398	325.2632203	56.18957688	21.70144126	0.180336723	0.451398493
60.73544433	1.714344214	1.003619585	325.437476	56.19661425	21.70423397	0.180359334	0.451715695
60.79673136	1.714563791	1.003745035	325.6115149	56.20364287	21.70702323	0.180381917	0.452032639
60.85801839	1.714783098	1.003870329	325.7853373	56.21066278	21.70980905	0.180404471	0.452349324
60.91930541	1.715002133	1.003995467	325.9589434	56.21767397	21.71259141	0.180426998	0.452665752
60.98059244	1.715220897	1.00412045	326.1323335	56.22467646	21.71537034	0.180449496	0.452981922
61.04187947	1.71543939	1.004245278	326.3055078	56.23167026	21.71814583	0.180471967	0.453297835
61.1031665	1.715657613	1.004369951	326.4784667	56.23865537	21.72091789	0.18049441	0.45361349
61.16445352	1.715875567	1.00449447	326.6512103	56.24563182	21.72368652	0.180516825	0.453928887
61.22574055	1.71609325	1.004618833	326.8237389	56.2525996	21.72645173	0.180539212	0.454244028
61.28702758	1.716310664	1.004743043	326.9960528	56.25955873	21.72921351	0.180561571	0.454558912
61.34831461	1.71652781	1.004867098	327.1681523	56.26650922	21.73197188	0.180583903	0.454873539
61.40960163	1.716744686	1.004990999	327.3400375	56.27345109	21.73472684	0.180606206	0.45518791
61.47088866	1.716961294	1.005114747	327.5117087	56.28038433	21.73747838	0.180628483	0.455502024
61.53217569	1.717177634	1.005238341	327.6831663	56.28730896	21.74022653	0.180650731	0.455815882
61.59346272	1.717393706	1.005361781	327.8544103	56.29422499	21.74297127	0.180672952	0.456129484
61.65474974	1.717609511	1.005485068	328.0254412	56.30113243	21.74571261	0.180695145	0.45644283
61.71603677	1.717825048	1.005608202	328.1962591	56.30803129	21.74845056	0.180717311	0.45675592
61.7773238	1.718040319	1.005731183	328.3668643	56.31492158	21.75118512	0.180739449	0.457068755
61.83861083	1.718255323	1.005854011	328.5372571	56.32180331	21.7539163	0.18076156	0.457381334
61.89989785	1.718470061	1.005976687	328.7074377	56.3286765	21.75664409	0.180783643	0.457693659
61.96118488	1.718684532	1.00609921	328.8774063	56.33554114	21.75936851	0.180805698	0.458005728
62.02247191	1.718898738	1.006221581	329.0471632	56.34239726	21.76208955	0.180827727	0.458317542
62.08375894	1.719112679	1.0063438	329.2167086	56.34924485	21.76480722	0.180849728	0.458629102
62.14504597	1.719326355	1.006465867	329.3860429	56.35608394	21.76752153	0.180871701	0.458940407
62.20633299	1.719539766	1.006587783	329.5551662	56.36291453	21.77023247	0.180893648	0.459251458
62.26762002	1.719752912	1.006709547	329.7240788	56.36973663	21.77294006	0.180915567	0.459562255
62.32890705	1.719965823	1.006831171	329.8927978	56.37655091	21.77564465	0.180937461	0.45987279
62.39019408	1.720178479	1.006952649	330.0613125	56.38335695	21.77834603	0.180959328	0.460183069
62.4514811	1.720390873	1.007073976	330.2296179	56.39015456	21.78104407	0.180981168	0.460493094
62.51276813	1.720603005	1.007195153	330.3977145	56.39694375	21.78373879	0.181002982	0.460802864
62.57405516	1.720814876	1.007316179	330.5656023	56.40372454	21.78643018	0.181024768	0.461112382
62.63534219	1.721026485	1.007437056	330.7332817	56.41049692	21.78911826	0.181046527	0.461421645
62.69662921	1.721237833	1.007557784	330.900753	56.41726092	21.79180302	0.18106826	0.461730656
62.75791624	1.72144892	1.007678361	331.0680163	56.42401654	21.79448447	0.181089965	0.462039413
62.81920327	1.721659747	1.007798789	331.2350719	56.43076379	21.79716262	0.181111644	0.462347917
62.8804903	1.721870314	1.007919069	331.4019201	56.43750268	21.79983746	0.181133295	0.462656169
62.94177732	1.722080621	1.008039199	331.5685612	56.44423323	21.802509	0.18115492	0.462964168
63.00306435	1.722290669	1.00815918	331.7349954	56.45095544	21.80517725	0.181176518	0.463271914
63.06435138	1.722500457	1.008279013	331.9012229	56.45766932	21.8078422	0.18119809	0.463579408
63.12563841	1.722709987	1.008398698	332.067244	56.46437489	21.81050388	0.181219634	0.46388665
63.18692543	1.722919258	1.008518234	332.233059	56.47107215	21.81316226	0.181241152	0.46419364
63.24821246	1.723128271	1.008637622	332.3986681	56.47776111	21.81581737	0.181262643	0.464500378
63.30949949	1.723337026	1.008756862	332.5640716	56.48444179	21.81846921	0.181284108	0.464806865
63.37078652	1.723545524	1.008875955	332.7292697	56.49111419	21.82111777	0.181305546	0.4651131
63.43207354	1.723753764	1.0089949	332.8942626	56.49777833	21.82376307	0.181326958	0.465419084
63.49336057	1.723961747	1.009113698	333.0590507	56.50443421	21.8264051	0.181348343	0.465724816
63.5546476	1.724169474	1.009232349	333.2236341	56.51108184	21.82904388	0.181369701	0.466030298
63.61593463	1.724376944	1.009350852	333.3880132	56.51772124	21.83167939	0.181391033	0.466335529
63.67722165	1.724584159	1.009469209	333.5521881	56.52435242	21.83431166	0.181412339	0.466640509
63.73850868	1.724791117	1.009587419	333.7161592	56.53097538	21.83694068	0.181433618	0.466945239
63.79979571	1.724997821	1.009705483	333.8799266	56.53759013	21.83956646	0.181454871	0.467249719
63.86108274	1.725204269	1.009823401	334.0434907	56.54419669	21.842189	0.181476097	0.467553948
63.92236977	1.725410462	1.009941172	334.2068516	56.55079506	21.8448083	0.181497297	0.467857928
63.98365679	1.725616401	1.010058798	334.3700096	56.55738526	21.84742437	0.181518471	0.468161657
64.04494382	1.725822085	1.010176278	334.532965	56.56396729	21.85003721	0.181539619	0.468465137
64.10623085	1.726027516	1.010293612	334.6957181	56.57054117	21.85264683	0.181560741	0.468768368
64.16751788	1.726232693	1.010410801	334.8582689	56.5771069	21.85525323	0.181581836	0.469071349
64.2288049	1.726437617	1.010527845	335.0206179	56.58366449	21.85785641	0.181602905	0.469374081
64.29009193	1.726642288	1.010644744	335.1827653	56.59021396	21.86045638	0.181623948	0.469676564
64.35137896	1.726846706	1.010761498	335.3447112	56.59675532	21.86305315	0.181644965	0.469978799
64.41266599	1.727050872	1.010878107	335.506456	56.60328857	21.8656467	0.181665956	0.470280785
64.47395301	1.727254786	1.010994572	335.6679999	56.60981372	21.86823706	0.181686921	0.470582522
64.53524004	1.727458448	1.011110893	335.8293431	56.61633078	21.87082422	0.18170786	0.470884011
64.59652707	1.727661859	1.011227069	335.9904859	56.62283977	21.87340818	0.181728773	0.471185252
64.6578141	1.727865019	1.011343102	336.1514286	56.6293407	21.87598896	0.18174966	0.471486245
64.71910112	1.728067927	1.011458991	336.3121713	56.63583356	21.87856655	0.181770522	0.47178699
64.78038815	1.728270586	1.011574736	336.4727143	56.64231838	21.88114096	0.181791357	0.472087488
64.84167518	1.728472993	1.011690337	336.6330578	56.64879517	21.88371219	0.181812166	0.472387738
64.90296221	1.728675151	1.011805796	336.7932022	56.65526392	21.88628025	0.18183295	0.472687741
64.96424923	1.72887706	1.011921111	336.9531476	56.66172466	21.88884514	0.181853708	0.472987496
65.02553626	1.729078719	1.012036284	337.1128943	56.66817739	21.89140686	0.18187444	0.473287005
65.08682329	1.729280129	1.012151313	337.2724425	56.67462212	21.89396542	0.181895147	0.473586267
65.14811032	1.72948129	1.012266201	337.4317925	56.68105886	21.89652082	0.181915828	0.473885282
65.20939734	1.729682203	1.012380945	337.5909445	56.68748763	21.89907306	0.181936483	0.474184051
65.27068437	1.729882867	1.012495548	337.7498987	56.69390842	21.90162215	0.181957113	0.474482574
65.3319714	1.730083284	1.012610008	337.9086554	56.70032125	21.9041681	0.181977717	0.47478085
65.39325843	1.730283453	1.012724327	338.0672149	56.70672614	21.9067109	0.181998296	0.475078881
65.45454545	1.730483375	1.012838504	338.2255773	56.71312308	21.90925056	0.182018849	0.475376665
65.51583248	1.73068305	1.012952539	338.3837429	56.7195121	21.91178708	0.182039376	0.475674205
65.57711951	1.730882478	1.013066433	338.541712	56.72589319	21.91432047	0.182059878	0.475971498
65.63840654	1.73108166	1.013180186	338.6994847	56.73226637	21.91685074	0.182080355	0.476268547
65.69969356	1.731280595	1.013293798	338.8570614	56.73863165	21.91937787	0.182100806	0.47656535
65.76098059	1.731479285	1.013407269	339.0144422	56.74498904	21.92190189	0.182121232	0.476861908
65.82226762	1.731677729	1.0135206	339.1716274	56.75133854	21.92442279	0.182141633	0.477158222
65.88355465	1.731875929	1.013633789	339.3286172	56.75768017	21.92694057	0.182162008	0.47745429
65.94484168	1.732073883	1.013746839	339.485412	56.76401394	21.92945524	0.182182358	0.477750115
66.0061287	1.732271592	1.013859748	339.6420118	56.77033985	21.93196681	0.182202683	0.478045695
66.06741573	1.732469058	1.013972518	339.7984169	56.77665792	21.93447527	0.182222983	0.478341031
66.12870276	1.732666279	1.014085147	339.9546276	56.78296815	21.93698064	0.182243257	0.478636123
66.18998979	1.732863256	1.014197637	340.1106442	56.78927056	21.9394829	0.182263506	0.478930971
66.25127681	1.73305999	1.014309987	340.2664667	56.79556515	21.94198208	0.18228373	0.479225576
66.31256384	1.733256481	1.014422198	340.4220956	56.80185193	21.94447817	0.18230393	0.479519937
66.37385087	1.733452729	1.01453427	340.5775309	56.80813091	21.94697117	0.182324104	0.479814055
66.4351379	1.733648734	1.014646203	340.732773	56.81440211	21.94946109	0.182344253	0.48010793
66.49642492	1.733844497	1.014757997	340.8878221	56.82066552	21.95194794	0.182364377	0.480401562
66.55771195	1.734040018	1.014869652	341.0426784	56.82692117	21.95443171	0.182384476	0.480694951
66.61899898	1.734235297	1.014981169	341.1973421	56.83316905	21.95691241	0.18240455	0.480988097
66.68028601	1.734430335	1.015092548	341.3518135	56.83940919	21.95939004	0.182424599	0.481281001
66.74157303	1.734625131	1.015203788	341.5060927	56.84564158	21.96186462	0.182444623	0.481573663
66.80286006	1.734819687	1.015314891	341.6601802	56.85186624	21.96433613	0.182464623	0.481866083
66.86414709	1.735014002	1.015425855	341.8140759	56.85808318	21.96680458	0.182484598	0.48215826
66.92543412	1.735208076	1.015536682	341.9677803	56.8642924	21.96926999	0.182504548	0.482450196
66.98672114	1.735401911	1.015647372	342.1212935	56.87049392	21.97173234	0.182524473	0.48274189
67.04800817	1.735595505	1.015757924	342.2746158	56.87668774	21.97419165	0.182544373	0.483033343
67.1092952	1.735788861	1.015868339	342.4277473	56.88287388	21.97664792	0.182564249	0.483324554
67.17058223	1.735981977	1.015978617	342.5806884	56.88905233	21.97910115	0.1825841	0.483615525
67.23186925	1.736174854	1.016088758	342.7334391	56.89522312	21.98155135	0.182603926	0.483906254
67.29315628	1.736367493	1.016198762	342.8859999	56.90138626	21.98399852	0.182623728	0.484196743
67.35444331	1.736559893	1.01630863	343.0383708	56.90754174	21.98644266	0.182643505	0.484486991
67.41573034	1.736752055	1.016418361	343.1905522	56.91368958	21.98888378	0.182663258	0.484776998
67.47701736	1.736943979	1.016527957	343.3425442	56.91982979	21.99132187	0.182682986	0.485066765
67.53830439	1.737135666	1.016637416	343.4943471	56.92596237	21.99375695	0.18270269	0.485356292
67.59959142	1.737327116	1.01674674	343.6459611	56.93208735	21.99618902	0.182722369	0.48564558
67.66087845	1.737518328	1.016855927	343.7973864	56.93820472	21.99861808	0.182742024	0.485934627
67.72216547	1.737709304	1.016964979	343.9486232	56.94431449	22.00104413	0.182761654	0.486223435
67.7834525	1.737900044	1.017073896	344.0996719	56.95041668	22.00346718	0.18278126	0.486512003
67.84473953	1.738090547	1.017182678	344.2505325	56.95651129	22.00588723	0.182800842	0.486800332
67.90602656	1.738280815	1.017291324	344.4012054	56.96259833	22.00830428	0.182820399	0.487088422
67.96731359	1.738470847	1.017399836	344.5516907	56.96867781	22.01071835	0.182839932	0.487376273
68.02860061	1.738660643	1.017508213	344.7019886	56.97474975	22.01312942	0.182859441	0.487663885
68.08988764	1.738850205	1.017616455	344.8520995	56.98081414	22.01553751	0.182878926	0.487951258
68.15117467	1.739039532	1.017724563	345.0020235	56.986871	22.01794262	0.182898386	0.488238393
68.2124617	1.739228624	1.017832537	345.1517608	56.99292033	22.02034475	0.182917822	0.48852529
68.27374872	1.739417482	1.017940376	345.3013117	56.99896215	22.02274391	0.182937234	0.488811948
68.33503575	1.739606106	1.018048082	345.4506763	57.00499647	22.0251401	0.182956622	0.489098369
68.39632278	1.739794497	1.018155654	345.599855	57.01102329	22.02753331	0.182975986	0.489384552
68.45760981	1.739982654	1.018263092	345.7488478	57.01704262	22.02992357	0.182995326	0.489670497
68.51889683	1.740170578	1.018370397	345.8976552	57.02305447	22.03231086	0.183014642	0.489956204
68.58018386	1.740358269	1.018477568	346.0462772	57.02905885	22.0346952	0.183033934	0.490241675
68.64147089	1.740545728	1.018584606	346.194714	57.03505577	22.03707658	0.183053201	0.490526908
68.70275792	1.740732954	1.018691511	346.342966	57.04104524	22.03945501	0.183072445	0.490811904
68.76404494	1.740919949	1.018798284	346.4910333	57.04702727	22.0418305	0.183091665	0.491096664
68.82533197	1.741106711	1.018904924	346.6389161	57.05300185	22.04420304	0.183110861	0.491381187
68.886619	1.741293242	1.019011431	346.7866146	57.05896902	22.04657265	0.183130034	0.491665473
68.94790603	1.741479547	1.019117808	346.9341328	57.0649289	22.04893938	0.183149182	0.491949522
69.00919305	1.741665644	1.019224063	347.0814825	57.07088196	22.05130347	0.183168309	0.492233328
69.07048008	1.741851511	1.019330187	347.2286492	57.07682764	22.05366464	0.183187412	0.492516897
69.13176711	1.742037149	1.01943618	347.3756333	57.08276595	22.0560229	0.183206492	0.492800231
69.19305414	1.742222557	1.019542041	347.5224348	57.08869691	22.05837825	0.183225548	0.493083329
69.25434116	1.742407737	1.01964777	347.669054	57.09462052	22.06073069	0.18324458	0.493366191
69.31562819	1.742592688	1.019753369	347.8154912	57.10053679	22.06308022	0.183263589	0.493648818
69.37691522	1.74277741	1.019858837	347.9617466	57.10644573	22.06542686	0.183282574	0.493931209
69.43820225	1.742961905	1.019964175	348.1078203	57.11234735	22.0677706	0.183301535	0.494213364
69.49948927	1.743146171	1.020069382	348.2537127	57.11824165	22.07011145	0.183320473	0.494495285
69.5607763	1.74333021	1.020174458	348.3994239	57.12412865	22.0724494	0.183339388	0.494776971
69.62206333	1.743514022	1.020279405	348.5449542	57.13000836	22.07478448	0.183358279	0.495058422
69.68335036	1.743697607	1.020384221	348.6903037	57.13588078	22.07711666	0.183377147	0.495339638
69.74463739	1.743880965	1.020488907	348.8354728	57.14174592	22.07944597	0.183395991	0.49562062
69.80592441	1.744064097	1.020593464	348.9804616	57.14760379	22.08177241	0.183414812	0.495901367
69.86721144	1.744247003	1.020697891	349.1252704	57.15345441	22.08409597	0.18343361	0.496181881
69.92849847	1.744429683	1.020802189	349.2698993	57.15929778	22.08641667	0.183452385	0.49646216
69.9897855	1.744612137	1.020906358	349.4143486	57.1651339	22.0887345	0.183471136	0.496742206
70.05107252	1.744794366	1.021010397	349.5586186	57.17096279	22.09104947	0.183489864	0.497022018
70.11235955	1.74497637	1.021114308	349.7027094	57.17678446	22.09336158	0.183508568	0.497301597
70.17364658	1.745158149	1.02121809	349.8466212	57.18259892	22.09567083	0.18352725	0.497580942
70.23493361	1.745339703	1.021321743	349.9903544	57.18840616	22.09797724	0.183545908	0.497860054
70.29622063	1.745521034	1.021425268	350.133909	57.19420621	22.10028079	0.183564544	0.498138933
70.35750766	1.74570214	1.021528665	350.2772854	57.19999908	22.10258151	0.183583156	0.498417579
70.41879469	1.745883023	1.021631933	350.4204836	57.20578476	22.10487938	0.183601745	0.498695992
70.48008172	1.746063682	1.021735073	350.5635041	57.21156327	22.10717442	0.183620311	0.498974173
70.54136874	1.746244119	1.021838086	350.7063469	57.21733462	22.10946662	0.183638854	0.499252122
70.60265577	1.746424332	1.021940971	350.8490123	57.22309882	22.11175599	0.183657374	0.499529838
70.6639428	1.746604323	1.022043728	350.9915006	57.22885587	22.11404254	0.183675871	0.499807323
70.72522983	1.746784092	1.022146359	351.1338118	57.23460578	22.11632626	0.183694345	0.500084575
70.78651685	1.746963638	1.022248861	351.2759463	57.24034857	22.11860716	0.183712797	0.500361596
70.84780388	1.747142963	1.022351237	351.4179043	57.24608424	22.12088525	0.183731225	0.500638385
70.90909091	1.747322066	1.022453486	351.5596859	57.2518128	22.12316052	0.183749631	0.500914943
70.97037794	1.747500948	1.022555609	351.7012915	57.25753426	22.12543298	0.183768013	0.50119127
71.03166496	1.747679609	1.022657604	351.8427211	57.26324863	22.12770264	0.183786373	0.501467365
71.09295199	1.747858049	1.022759474	351.9839751	57.26895591	22.1299695	0.183804711	0.50174323
71.15423902	1.748036269	1.022861217	352.1250536	57.27465612	22.13223355	0.183823025	0.502018864
71.21552605	1.748214269	1.022962834	352.2659569	57.28034926	22.13449481	0.183841317	0.502294267
71.27681307	1.748392049	1.023064325	352.4066852	57.28603535	22.13675328	0.183859586	0.50256944
71.3381001	1.748569609	1.02316569	352.5472386	57.29171438	22.13900895	0.183877832	0.502844382
71.39938713	1.74874695	1.023266929	352.6876174	57.29738637	22.14126184	0.183896056	0.503119095
71.46067416	1.748924072	1.023368043	352.8278219	57.30305134	22.14351195	0.183914257	0.503393577
71.52196118	1.749100975	1.023469032	352.9678522	57.30870927	22.14575928	0.183932436	0.50366783
71.58324821	1.749277659	1.023569895	353.1077085	57.3143602	22.14800384	0.183950592	0.503941853
71.64453524	1.749454125	1.023670634	353.247391	57.32000411	22.15024562	0.183968726	0.504215647
71.70582227	1.749630374	1.023771247	353.3869001	57.32564103	22.15248463	0.183986837	0.504489211
71.7671093	1.749806404	1.023871736	353.5262358	57.33127096	22.15472088	0.184004926	0.504762546
71.82839632	1.749982217	1.0239721	353.6653984	57.3368939	22.15695436	0.184022992	0.505035652
71.88968335	1.750157812	1.02407234	353.8043881	57.34250988	22.15918509	0.184041036	0.50530853
71.95097038	1.750333191	1.024172455	353.9432051	57.34811888	22.16141306	0.184059057	0.505581179
72.01225741	1.750508353	1.024272447	354.0818496	57.35372094	22.16363828	0.184077056	0.505853599
72.07354443	1.750683298	1.024372314	354.2203219	57.35931604	22.16586075	0.184095033	0.506125791
72.13483146	1.750858028	1.024472058	354.3586221	57.36490421	22.16808047	0.184112988	0.506397754
72.19611849	1.751032541	1.024571677	354.4967504	57.37048545	22.17029745	0.18413092	0.50666949
72.25740552	1.751206839	1.024671174	354.6347071	57.37605976	22.17251169	0.18414883	0.506940998
72.31869254	1.751380921	1.024770547	354.7724924	57.38162716	22.1747232	0.184166718	0.507212278
72.37997957	1.751554788	1.024869796	354.9101065	57.38718766	22.17693197	0.184184583	0.50748333
72.4412666	1.75172844	1.024968923	355.0475495	57.39274126	22.17913802	0.184202427	0.507754156
72.50255363	1.751901878	1.025067926	355.1848217	57.39828797	22.18134134	0.184220248	0.508024753
72.56384065	1.752075101	1.025166807	355.3219234	57.40382779	22.18354194	0.184238047	0.508295124
72.62512768	1.75224811	1.025265566	355.4588546	57.40936075	22.18573981	0.184255824	0.508565268
72.68641471	1.752420905	1.025364201	355.5956157	57.41488684	22.18793498	0.184273579	0.508835186
72.74770174	1.752593487	1.025462715	355.7322068	57.42040608	22.19012742	0.184291312	0.509104876
72.80898876	1.752765855	1.025561106	355.8686281	57.42591847	22.19231716	0.184309023	0.50937434
72.87027579	1.752938011	1.025659375	356.0048799	57.43142402	22.1945042	0.184326712	0.509643578
72.93156282	1.753109953	1.025757522	356.1409623	57.43692274	22.19668853	0.184344379	0.50991259
72.99284985	1.753281683	1.025855548	356.2768755	57.44241464	22.19887016	0.184362025	0.510181376
73.05413687	1.7534532	1.025953451	356.4126198	57.44789972	22.2010491	0.184379648	0.510449936
73.1154239	1.753624506	1.026051234	356.5481954	57.453378	22.20322534	0.184397249	0.510718271
73.17671093	1.7537956	1.026148895	356.6836024	57.45884948	22.20539889	0.184414829	0.51098638
73.23799796	1.753966482	1.026246435	356.8188411	57.46431417	22.20756975	0.184432387	0.511254263
73.29928498	1.754137153	1.026343854	356.9539116	57.46977208	22.20973794	0.184449923	0.511521922
73.36057201	1.754307613	1.026441152	357.0888143	57.47522321	22.21190344	0.184467437	0.511789355
73.42185904	1.754477862	1.026538329	357.2235492	57.48066758	22.21406626	0.184484929	0.512056564
73.48314607	1.7546479	1.026635386	357.3581166	57.48610519	22.21622641	0.1845024	0.512323548
73.54443309	1.754817728	1.026732322	357.4925166	57.49153606	22.2183839	0.184519849	0.512590308
73.60572012	1.754987347	1.026829138	357.6267496	57.49696018	22.22053871	0.184537277	0.512856843
73.66700715	1.755156755	1.026925834	357.7608156	57.50237757	22.22269086	0.184554682	0.513123154
73.72829418	1.755325954	1.027022409	357.8947149	57.50778823	22.22484035	0.184572067	0.513389241
73.78958121	1.755494944	1.027118865	358.0284478	57.51319218	22.22698718	0.184589429	0.513655104
73.85086823	1.755663724	1.027215201	358.1620143	57.51858942	22.22913135	0.18460677	0.513920744
73.91215526	1.755832296	1.027311418	358.2954147	57.52397996	22.23127288	0.18462409	0.514186159
73.97344229	1.75600066	1.027407515	358.4286492	57.5293638	22.23341176	0.184641388	0.514451352
74.03472932	1.756168815	1.027503493	358.5617179	57.53474096	22.23554799	0.184658664	0.514716321
74.09601634	1.756336762	1.027599352	358.6946212	57.54011145	22.23768158	0.184675919	0.514981067
74.15730337	1.756504501	1.027695091	358.8273592	57.54547526	22.23981253	0.184693153	0.51524559
74.2185904	1.756672033	1.027790712	358.959932	57.55083242	22.24194085	0.184710365	0.515509891
74.27987743	1.756839358	1.027886214	359.09234	57.55618292	22.24406653	0.184727556	0.515773969
74.34116445	1.757006475	1.027981598	359.2245832	57.56152678	22.24618958	0.184744726	0.516037824
74.40245148	1.757173386	1.028076863	359.3566619	57.566864	22.24831001	0.184761874	0.516301457
74.46373851	1.75734009	1.028172009	359.4885763	57.57219459	22.25042782	0.184779001	0.516564868
74.52502554	1.757506588	1.028267038	359.6203266	57.57751856	22.252543	0.184796107	0.516828057
74.58631256	1.75767288	1.028361949	359.7519129	57.58283592	22.25465557	0.184813191	0.517091024
74.64759959	1.757838966	1.028456741	359.8833355	57.58814667	22.25676553	0.184830254	0.51735377
74.70888662	1.758004847	1.028551416	360.0145946	57.59345082	22.25887287	0.184847296	0.517616294
74.77017365	1.758170522	1.028645974	360.1456904	57.59874839	22.26097761	0.184864317	0.517878597
74.83146067	1.758335992	1.028740413	360.276623	57.60403937	22.26307974	0.184881317	0.518140678
74.8927477	1.758501257	1.028834736	360.4073927	57.60932378	22.26517927	0.184898295	0.518402539
74.95403473	1.758666318	1.028928941	360.5379996	57.61460162	22.26727621	0.184915253	0.518664179
75.01532176	1.758831175	1.02902303	360.668444	57.61987291	22.26937055	0.184932189	0.518925598
75.07660878	1.758995827	1.029117001	360.798726	57.62513764	22.2714623	0.184949104	0.519186796
75.13789581	1.759160276	1.029210856	360.9288459	57.63039583	22.27355146	0.184965999	0.519447774
75.19918284	1.759324521	1.029304594	361.0588037	57.63564749	22.27563803	0.184982872	0.519708532
75.26046987	1.759488562	1.029398215	361.1885998	57.64089262	22.27772202	0.184999724	0.51996907
75.32175689	1.759652401	1.029491721	361.3182344	57.64613123	22.27980343	0.185016556	0.520229388
75.38304392	1.759816037	1.02958511	361.4477075	57.65136333	22.28188227	0.185033366	0.520489486
75.44433095	1.75997947	1.029678383	361.5770194	57.65658892	22.28395853	0.185050156	0.520749364
75.50561798	1.7601427	1.02977154	361.7061703	57.66180802	22.28603222	0.185066924	0.521009023
75.56690501	1.760305729	1.029864581	361.8351605	57.66702063	22.28810334	0.185083672	0.521268463
75.62819203	1.760468565	1.029957513	361.9639986	57.67222714	22.29017202	0.1851004	0.521527681
75.68947906	1.760631205	1.030050334	362.0926818	57.67742742	22.29223821	0.185117109	0.521786678
75.75076609	1.760793645	1.03014304	362.2212053	57.68262126	22.29430185	0.185133796	0.522045456
75.81205312	1.760955884	1.030235632	362.3495693	57.68780867	22.29636294	0.185150463	0.522304015
75.87334014	1.761117922	1.030328108	362.4777738	57.69298964	22.29842148	0.185167109	0.522562355
75.93462717	1.76127976	1.03042047	362.6058192	57.69816419	22.30047749	0.185183735	0.522820477
75.9959142	1.761441399	1.030512718	362.7337056	57.70333233	22.30253095	0.18520034	0.523078381
76.05720123	1.761602837	1.030604851	362.8614333	57.70849406	22.30458188	0.185216924	0.523336067
76.11848825	1.761764076	1.03069687	362.9890023	57.7136494	22.30663027	0.185233488	0.523593534
76.17977528	1.761925116	1.030788775	363.1164129	57.71879835	22.30867614	0.185250031	0.523850784
76.24106231	1.762085957	1.030880566	363.2436654	57.72394091	22.31071947	0.185266554	0.524107815
76.30234934	1.7622466	1.030972243	363.3707599	57.72907711	22.31276029	0.185283056	0.52436463
76.36363636	1.762407043	1.031063807	363.4976965	57.73420693	22.31479858	0.185299538	0.524621227
76.42492339	1.762567289	1.031155257	363.6244756	57.7393304	22.31683436	0.185316	0.524877606
76.48621042	1.762727337	1.031246594	363.7510972	57.74444752	22.31886762	0.185332441	0.525133769
76.54749745	1.762887187	1.031337818	363.8775616	57.74955829	22.32089837	0.185348861	0.525389714
76.60878447	1.763046839	1.031428928	364.003869	57.75466274	22.32292661	0.185365262	0.525645443
76.6700715	1.763206294	1.031519926	364.1300195	57.75976085	22.32495235	0.185381642	0.525900955
76.73135853	1.763365552	1.031610811	364.2560134	57.76485264	22.32697558	0.185398001	0.526156251
76.79264556	1.763524614	1.031701584	364.3818509	57.76993813	22.32899631	0.185414341	0.52641133
76.85393258	1.763683478	1.031792243	364.5075321	57.77501731	22.33101455	0.18543066	0.526666194
76.91521961	1.763842147	1.031882791	364.6330573	57.78009019	22.3330303	0.185446959	0.526920841
76.97650664	1.764000619	1.031973226	364.7584266	57.78515679	22.33504355	0.185463238	0.527175272
77.03779367	1.764158896	1.032063549	364.8836402	57.7902171	22.33705432	0.185479496	0.527429488
77.09908069	1.764316977	1.032153761	365.0086983	57.79527114	22.3390626	0.185495734	0.527683488
77.16036772	1.764474863	1.03224386	365.1336012	57.80031892	22.34106841	0.185511953	0.527937272
77.22165475	1.764632553	1.032333848	365.2583489	57.80536044	22.34307173	0.185528151	0.528190842
77.28294178	1.764790049	1.032423724	365.3829417	57.81039571	22.34507258	0.185544329	0.528444196
77.3442288	1.76494735	1.032513489	365.5073799	57.81542474	22.34707096	0.185560487	0.528697335
77.40551583	1.765104457	1.032603142	365.6316634	57.82044754	22.34906687	0.185576625	0.52895026
77.46680286	1.76526137	1.032692685	365.7557927	57.8254641	22.35106032	0.185592743	0.52920297
77.52808989	1.765418088	1.032782116	365.8797678	57.83047445	22.3530513	0.185608841	0.529455465
77.58937692	1.765574613	1.032871437	366.0035889	57.83547859	22.35503982	0.185624919	0.529707747
77.65066394	1.765730945	1.032960647	366.1272563	57.84047652	22.35702588	0.185640977	0.529959814
77.71195097	1.765887083	1.033049746	366.25077	57.84546826	22.35900949	0.185657015	0.530211667
77.773238	1.766043029	1.033138735	366.3741304	57.85045381	22.36099065	0.185673034	0.530463306
77.83452503	1.766198781	1.033227613	366.4973376	57.85543317	22.36296936	0.185689032	0.530714731
77.89581205	1.766354342	1.033316381	366.6203918	57.86040637	22.36494563	0.185705011	0.530965943
77.95709908	1.76650971	1.03340504	366.7432931	57.86537339	22.36691946	0.185720969	0.531216942
78.01838611	1.766664885	1.033493588	366.8660418	57.87033426	22.36889084	0.185736908	0.531467727
78.07967314	1.76681987	1.033582027	366.988638	57.87528898	22.37085979	0.185752828	0.531718299
78.14096016	1.766974662	1.033670356	367.111082	57.88023755	22.37282631	0.185768727	0.531968658
78.20224719	1.767129263	1.033758575	367.2333739	57.88517999	22.3747904	0.185784607	0.532218805
78.26353422	1.767283673	1.033846685	367.3555139	57.8901163	22.37675206	0.185800467	0.532468738
78.32482125	1.767437893	1.033934686	367.4775022	57.89504649	22.37871129	0.185816308	0.53271846
78.38610827	1.767591921	1.034022578	367.599339	57.89997057	22.38066811	0.185832128	0.532967969
78.4473953	1.767745759	1.03411036	367.7210244	57.90488853	22.3826225	0.18584793	0.533217266
78.50868233	1.767899407	1.034198034	367.8425587	57.9098004	22.38457448	0.185863711	0.53346635
78.56996936	1.768052865	1.034285599	367.963942	57.91470618	22.38652405	0.185879473	0.533715223
78.63125638	1.768206134	1.034373056	368.0851745	57.91960588	22.38847121	0.185895216	0.533963885
78.69254341	1.768359213	1.034460404	368.2062565	57.9244995	22.39041596	0.185910939	0.534212334
78.75383044	1.768512102	1.034547644	368.327188	57.92938705	22.39235831	0.185926642	0.534460573
78.81511747	1.768664803	1.034634776	368.4479693	57.93426854	22.39429826	0.185942326	0.5347086
78.87640449	1.768817315	1.034721799	368.5686005	57.93914397	22.39623581	0.185957991	0.534956416
78.93769152	1.768969638	1.034808715	368.6890819	57.94401336	22.39817096	0.185973636	0.535204021
78.99897855	1.769121773	1.034895523	368.8094136	57.9488767	22.40010372	0.185989261	0.535451415
79.06026558	1.76927372	1.034982223	368.9295959	57.95373402	22.4020341	0.186004868	0.535698598
79.1215526	1.769425479	1.035068816	369.0496288	57.95858531	22.40396208	0.186020455	0.535945572
79.18283963	1.76957705	1.035155301	369.1695125	57.96343058	22.40588769	0.186036022	0.536192334
79.24412666	1.769728434	1.035241679	369.2892473	57.96826985	22.40781091	0.18605157	0.536438887
79.30541369	1.76987963	1.03532795	369.4088334	57.97310311	22.40973176	0.186067099	0.536685229
79.36670072	1.77003064	1.035414114	369.5282709	57.97793037	22.41165023	0.186082609	0.536931362
79.42798774	1.770181463	1.035500171	369.6475599	57.98275165	22.41356633	0.1860981	0.537177285
79.48927477	1.770332099	1.035586122	369.7667008	57.98756694	22.41548006	0.186113571	0.537422998
79.5505618	1.77048255	1.035671965	369.8856935	57.99237626	22.41739142	0.186129023	0.537668502
79.61184883	1.770632814	1.035757703	370.0045385	57.99717962	22.41930042	0.186144456	0.537913797
79.67313585	1.770782892	1.035843334	370.1232357	58.00197701	22.42120706	0.18615987	0.538158883
79.73442288	1.770932784	1.035928858	370.2417855	58.00676846	22.42311135	0.186175265	0.538403759
79.79570991	1.771082492	1.036014277	370.3601879	58.01155396	22.42501327	0.18619064	0.538648427
79.85699694	1.771232014	1.036099589	370.4784431	58.01633352	22.42691285	0.186205997	0.538892886
79.91828396	1.771381351	1.036184796	370.5965514	58.02110715	22.42881008	0.186221334	0.539137137
79.97957099	1.771530503	1.036269897	370.7145129	58.02587485	22.43070496	0.186236652	0.539381179
80.04085802	1.771679471	1.036354892	370.8323278	58.03063664	22.4325975	0.186251952	0.539625013
80.10214505	1.771828255	1.036439782	370.9499963	58.03539252	22.43448769	0.186267232	0.539868639
80.16343207	1.771976854	1.036524567	371.0675185	58.0401425	22.43637555	0.186282494	0.540112057
80.2247191	1.77212527	1.036609246	371.1848947	58.04488659	22.43826108	0.186297736	0.540355268
80.28600613	1.772273502	1.036693821	371.3021249	58.04962479	22.44014427	0.18631296	0.540598271
80.34729316	1.77242155	1.03677829	371.4192094	58.0543571	22.44202513	0.186328164	0.540841066
80.40858018	1.772569416	1.036862655	371.5361484	58.05908354	22.44390367	0.18634335	0.541083654
80.46986721	1.772717098	1.036946915	371.652942	58.06380412	22.44577988	0.186358517	0.541326035
80.53115424	1.772864598	1.03703107	371.7695904	58.06851884	22.44765377	0.186373665	0.541568209
80.59244127	1.773011916	1.037115121	371.8860938	58.0732277	22.44952535	0.186388795	0.541810176
80.65372829	1.773159051	1.037199067	372.0024523	58.07793072	22.45139461	0.186403905	0.542051937
80.71501532	1.773306003	1.03728291	372.1186662	58.08262791	22.45326155	0.186418997	0.54229349
80.77630235	1.773452774	1.037366648	372.2347355	58.08731926	22.45512619	0.18643407	0.542534838
80.83758938	1.773599364	1.037450282	372.3506606	58.09200478	22.45698852	0.186449124	0.542775979
80.8988764	1.773745772	1.037533813	372.4664415	58.09668449	22.45884854	0.18646416	0.543016914
80.96016343	1.773891999	1.03761724	372.5820785	58.10135839	22.46070626	0.186479177	0.543257644
81.02145046	1.774038044	1.037700563	372.6975716	58.10602649	22.46256169	0.186494175	0.543498167
81.08273749	1.77418391	1.037783783	372.8129211	58.11068879	22.46441482	0.186509155	0.543738485
81.14402451	1.774329594	1.037866899	372.9281272	58.1153453	22.46626565	0.186524116	0.543978597
81.20531154	1.774475098	1.037949913	373.04319	58.11999603	22.4681142	0.186539059	0.544218504
81.26659857	1.774620422	1.038032823	373.1581097	58.12464098	22.46996045	0.186553983	0.544458206
81.3278856	1.774765566	1.03811563	373.2728865	58.12928016	22.47180442	0.186568888	0.544697703
81.38917263	1.774910531	1.038198335	373.3875205	58.13391359	22.47364611	0.186583775	0.544936995
81.45045965	1.775055316	1.038280936	373.5020119	58.13854126	22.47548552	0.186598644	0.545176082
81.51174668	1.775199921	1.038363436	373.6163609	58.14316318	22.47732266	0.186613494	0.545414965
81.57303371	1.775344348	1.038445832	373.7305677	58.14777936	22.47915751	0.186628325	0.545653643
81.63432074	1.775488596	1.038528127	373.8446323	58.1523898	22.4809901	0.186643138	0.545892117
81.69560776	1.775632665	1.038610319	373.9585551	58.15699452	22.48282042	0.186657933	0.546130387
81.75689479	1.775776556	1.038692409	374.0723362	58.16159352	22.48464847	0.186672709	0.546368453
81.81818182	1.775920268	1.038774397	374.1859756	58.16618681	22.48647426	0.186687467	0.546606315
81.87946885	1.776063803	1.038856283	374.2994737	58.17077439	22.48829779	0.186702207	0.546843974
81.94075587	1.77620716	1.038938068	374.4128306	58.17535627	22.49011906	0.186716928	0.547081429
82.0020429	1.776350339	1.039019751	374.5260464	58.17993246	22.49193808	0.186731631	0.54731868
82.06332993	1.776493341	1.039101332	374.6391213	58.18450296	22.49375484	0.186746316	0.547555729
82.12461696	1.776636166	1.039182813	374.7520555	58.18906778	22.49556936	0.186760983	0.547792574
82.18590398	1.776778814	1.039264191	374.8648492	58.19362693	22.49738162	0.186775631	0.548029216
82.24719101	1.776921285	1.03934547	374.9775031	58.19818043	22.49919165	0.186790261	0.548265656
82.30847804	1.777063593	1.039426655	375.0900271	58.20272872	22.50099959	0.186804875	0.54850189
82.36976507	1.777205724	1.039507739	375.2024114	58.20727137	22.50280529	0.18681947	0.548737922
82.43105209	1.77734768	1.039588723	375.3146562	58.21180839	22.50460877	0.186834047	0.548973751
82.49233912	1.77748946	1.039669606	375.4267617	58.21633979	22.50641001	0.186848606	0.549209378
82.55362615	1.777631065	1.03975039	375.538728	58.22086557	22.50820903	0.186863147	0.549444803
82.61491318	1.777772495	1.039831073	375.6505554	58.22538574	22.51000583	0.18687767	0.549680025
82.6762002	1.77791375	1.039911656	375.7622439	58.22990031	22.5118004	0.186892175	0.549915047
82.73748723	1.778054831	1.03999214	375.8737938	58.23440928	22.51359276	0.186906663	0.550149866
82.79877426	1.778195737	1.040072523	375.9852052	58.23891267	22.51538291	0.186921132	0.550384484
82.86006129	1.778336469	1.040152807	376.0964783	58.24341048	22.51717084	0.186935583	0.5506189
82.92134831	1.778477027	1.040232992	376.2076133	58.24790271	22.51895656	0.186950016	0.550853116
82.98263534	1.778617412	1.040313077	376.3186103	58.25238937	22.52074008	0.186964432	0.55108713
83.04392237	1.778757623	1.040393063	376.4294695	58.25687047	22.52252139	0.186978829	0.551320943
83.1052094	1.77889766	1.04047295	376.5401911	58.26134602	22.5243005	0.186993209	0.551554555
83.16649642	1.779037525	1.040552737	376.6507753	58.26581602	22.52607741	0.187007571	0.551787967
83.22778345	1.779177216	1.040632426	376.7612222	58.27028048	22.52785213	0.187021915	0.552021179
83.28907048	1.779316735	1.040712016	376.8715319	58.27473941	22.52962465	0.187036241	0.55225419
83.35035751	1.779456082	1.040791508	376.9817048	58.27919281	22.53139498	0.18705055	0.552487001
83.41164454	1.779595256	1.040870901	377.0917408	58.28364069	22.53316313	0.187064841	0.552719611
83.47293156	1.779734258	1.040950196	377.2016403	58.28808306	22.53492909	0.187079114	0.552952022
83.53421859	1.779873089	1.041029392	377.3114033	58.29251992	22.53669286	0.187093369	0.553184233
83.59550562	1.780011748	1.04110849	377.42103	58.29695128	22.53845446	0.187107607	0.553416245
83.65679265	1.780150235	1.04118749	377.5305207	58.30137715	22.54021388	0.187121827	0.553648057
83.71807967	1.780288551	1.041266392	377.6398754	58.30579754	22.54197113	0.187136029	0.55387967
83.7793667	1.780426696	1.041345197	377.7490944	58.31021244	22.5437262	0.187150214	0.554111083
83.84065373	1.780564671	1.041423904	377.8581777	58.31462187	22.54547911	0.187164381	0.554342298
83.90194076	1.780702475	1.041502513	377.9671256	58.31902584	22.54722984	0.187178531	0.554573314
83.96322778	1.780840108	1.041581025	378.0759383	58.32342435	22.54897842	0.187192663	0.554804131
84.02451481	1.780977571	1.041659439	378.1846159	58.3278174	22.55072483	0.187206778	0.555034749
84.08580184	1.781114865	1.041737757	378.2931585	58.33220501	22.55246909	0.187220875	0.555265169
84.14708887	1.781251988	1.041815977	378.4015664	58.33658718	22.55421118	0.187234955	0.555495391
84.20837589	1.781388943	1.0418941	378.5098396	58.34096392	22.55595113	0.187249017	0.555725415
84.26966292	1.781525727	1.041972126	378.6179785	58.34533523	22.55768892	0.187263062	0.55595524
84.33094995	1.781662343	1.042050056	378.725983	58.34970112	22.55942457	0.187277089	0.556184868
84.39223698	1.78179879	1.042127889	378.8338535	58.35406161	22.56115807	0.187291099	0.556414298
84.453524	1.781935068	1.042205626	378.94159	58.35841668	22.56288943	0.187305092	0.556643531
84.51481103	1.782071177	1.042283266	379.0491927	58.36276636	22.56461865	0.187319067	0.556872566
84.57609806	1.782207119	1.04236081	379.1566619	58.36711064	22.56634572	0.187333025	0.557101404
84.63738509	1.782342892	1.042438258	379.2639976	58.37144954	22.56807067	0.187346966	0.557330045
84.69867211	1.782478497	1.04251561	379.3712	58.37578306	22.56979348	0.187360889	0.557558488
84.75995914	1.782613935	1.042592866	379.4782692	58.3801112	22.57151416	0.187374795	0.557786735
84.82124617	1.782749205	1.042670026	379.5852056	58.38443398	22.57323272	0.187388684	0.558014786
84.8825332	1.782884307	1.042747091	379.6920091	58.3887514	22.57494915	0.187402556	0.55824264
84.94382022	1.783019243	1.04282406	379.79868	58.39306347	22.57666346	0.18741641	0.558470297
85.00510725	1.783154012	1.042900934	379.9052184	58.39737019	22.57837565	0.187430247	0.558697758
85.06639428	1.783288614	1.042977712	380.0116245	58.40167157	22.58008572	0.187444068	0.558925024
85.12768131	1.78342305	1.043054395	380.1178985	58.40596762	22.58179367	0.187457871	0.559152093
85.18896834	1.78355732	1.043130983	380.2240405	58.41025834	22.58349952	0.187471656	0.559378966
85.25025536	1.783691423	1.043207476	380.3300507	58.41454374	22.58520325	0.187485425	0.559605644
85.31154239	1.78382536	1.043283875	380.4359292	58.41882383	22.58690488	0.187499177	0.559832126
85.37282942	1.783959132	1.043360178	380.5416762	58.4230986	22.58860441	0.187512912	0.560058413
85.43411645	1.784092739	1.043436387	380.6472919	58.42736808	22.59030183	0.187526629	0.560284505
85.49540347	1.78422618	1.043512502	380.7527764	58.43163227	22.59199716	0.18754033	0.560510402
85.5566905	1.784359456	1.043588522	380.8581298	58.43589116	22.59369038	0.187554013	0.560736103
85.61797753	1.784492567	1.043664448	380.9633524	58.44014478	22.59538152	0.18756768	0.56096161
85.67926456	1.784625514	1.043740279	381.0684444	58.44439311	22.59707056	0.18758133	0.561186923
85.74055158	1.784758296	1.043816017	381.1734057	58.44863618	22.59875751	0.187594962	0.561412041
85.80183861	1.784890914	1.043891661	381.2782367	58.45287399	22.60044238	0.187608578	0.561636964
85.86312564	1.785023368	1.04396721	381.3829375	58.45710654	22.60212516	0.187622177	0.561861693
85.92441267	1.785155658	1.044042667	381.4875082	58.46133385	22.60380586	0.187635759	0.562086229
85.98569969	1.785287784	1.044118029	381.591949	58.46555591	22.60548449	0.187649325	0.56231057
86.04698672	1.785419747	1.044193299	381.6962601	58.46977273	22.60716103	0.187662873	0.562534718
86.10827375	1.785551546	1.044268474	381.8004416	58.47398432	22.6088355	0.187676405	0.562758672
86.16956078	1.785683183	1.044343557	381.9044936	58.47819069	22.6105079	0.18768992	0.562982432
86.2308478	1.785814657	1.044418546	382.0084164	58.48239184	22.61217824	0.187703418	0.563205999
86.29213483	1.785945967	1.044493443	382.11221	58.48658778	22.6138465	0.187716899	0.563429374
86.35342186	1.786077116	1.044568246	382.2158747	58.49077852	22.6155127	0.187730364	0.563652555
86.41470889	1.786208102	1.044642957	382.3194106	58.49496405	22.61717685	0.187743811	0.563875543
86.47599591	1.786338926	1.044717575	382.4228179	58.4991444	22.61883893	0.187757243	0.564098338
86.53728294	1.786469588	1.044792101	382.5260966	58.50331956	22.62049895	0.187770657	0.564320941
86.59856997	1.786600089	1.044866534	382.629247	58.50748953	22.62215692	0.187784055	0.564543351
86.659857	1.786730428	1.044940875	382.7322693	58.51165434	22.62381284	0.187797437	0.564765569
86.72114402	1.786860605	1.045015123	382.8351635	58.51581398	22.62546671	0.187810801	0.564987595
86.78243105	1.786990622	1.04508928	382.9379299	58.51996845	22.62711854	0.187824149	0.565209429
86.84371808	1.787120478	1.045163344	383.0405685	58.52411777	22.62876832	0.187837481	0.565431071
86.90500511	1.787250172	1.045237317	383.1430796	58.52826195	22.63041606	0.187850796	0.565652521
86.96629213	1.787379707	1.045311198	383.2454633	58.53240098	22.63206176	0.187864094	0.56587378
87.02757916	1.787509081	1.045384987	383.3477197	58.53653487	22.63370542	0.187877376	0.566094847
87.08886619	1.787638295	1.045458684	383.4498491	58.54066364	22.63534705	0.187890642	0.566315723
87.15015322	1.787767349	1.04553229	383.5518515	58.54478728	22.63698665	0.187903891	0.566536407
87.21144025	1.787896243	1.045605805	383.6537271	58.54890581	22.63862421	0.187917124	0.566756901
87.27272727	1.788024977	1.045679229	383.7554761	58.55301922	22.64025975	0.18793034	0.566977204
87.3340143	1.788153552	1.045752561	383.8570986	58.55712753	22.64189327	0.18794354	0.567197316
87.39530133	1.788281968	1.045825802	383.9585948	58.56123074	22.64352476	0.187956723	0.567417238
87.45658836	1.788410225	1.045898953	384.0599648	58.56532885	22.64515424	0.18796989	0.567636969
87.51787538	1.788538324	1.045972013	384.1612088	58.56942189	22.64678169	0.187983041	0.56785651
87.57916241	1.788666263	1.046044982	384.2623269	58.57350984	22.64840714	0.187996175	0.56807586
87.64044944	1.788794044	1.04611786	384.3633193	58.57759271	22.65003057	0.188009293	0.568295021
87.70173647	1.788921667	1.046190648	384.4641861	58.58167052	22.65165199	0.188022395	0.568513992
87.76302349	1.789049132	1.046263346	384.5649275	58.58574326	22.6532714	0.18803548	0.568732773
87.82431052	1.789176439	1.046335954	384.6655436	58.58981095	22.65488881	0.18804855	0.568951364
87.88559755	1.789303588	1.046408471	384.7660346	58.59387359	22.65650421	0.188061603	0.569169766
87.94688458	1.78943058	1.046480898	384.8664007	58.59793119	22.65811761	0.18807464	0.569387979
88.0081716	1.789557415	1.046553236	384.9666419	58.60198375	22.65972902	0.18808766	0.569606002
88.06945863	1.789684092	1.046625483	385.0667585	58.60603127	22.66133843	0.188100665	0.569823837
88.13074566	1.789810613	1.046697641	385.1667506	58.61007377	22.66294585	0.188113653	0.570041483
88.19203269	1.789936976	1.04676971	385.2666183	58.61411125	22.66455127	0.188126625	0.57025894
88.25331971	1.790063183	1.046841688	385.3663618	58.61814372	22.66615471	0.188139581	0.570476208
88.31460674	1.790189234	1.046913578	385.4659812	58.62217118	22.66775616	0.188152521	0.570693288
88.37589377	1.790315129	1.046985378	385.5654767	58.62619364	22.66935563	0.188165445	0.57091018
88.4371808	1.790440868	1.047057089	385.6648484	58.6302111	22.67095312	0.188178353	0.571126883
88.49846782	1.790566451	1.047128711	385.7640965	58.63422357	22.67254862	0.188191245	0.571343399
88.55975485	1.790691878	1.047200244	385.8632212	58.63823106	22.67414215	0.188204121	0.571559727
88.62104188	1.79081715	1.047271688	385.9622225	58.64223357	22.67573371	0.188216981	0.571775867
88.68232891	1.790942266	1.047343044	386.0611006	58.64623111	22.67732329	0.188229825	0.571991819
88.74361593	1.791067228	1.047414311	386.1598557	58.65022369	22.67891091	0.188242653	0.572207584
88.80490296	1.791192034	1.047485489	386.258488	58.6542113	22.68049656	0.188255465	0.572423161
88.86618999	1.791316686	1.047556579	386.3569975	58.65819396	22.68208024	0.188268261	0.572638552
88.92747702	1.79144119	1.047627583	386.455389	58.66217185	22.68366203	0.188281041	0.572853754
88.98876404	1.791565545	1.047698504	386.5536633	58.66614499	22.68524194	0.188293807	0.573068769
89.05005107	1.791689746	1.047769336	386.6518156	58.67011321	22.6868199	0.188306557	0.573283597
89.1113381	1.791813794	1.04784008	386.7498461	58.67407651	22.68839591	0.188319291	0.573498238
89.17262513	1.791937689	1.047910737	386.847755	58.6780349	22.68996997	0.188332009	0.573712693
89.23391216	1.79206143	1.047981306	386.9455423	58.68198839	22.69154209	0.188344711	0.573926961
89.29519918	1.792185018	1.048051788	387.0432082	58.68593697	22.69311226	0.188357398	0.574141043
89.35648621	1.792308454	1.048122182	387.140753	58.68988067	22.69468049	0.188370068	0.574354939
89.41777324	1.792431737	1.048192489	387.2381766	58.69381947	22.69624679	0.188382724	0.574568649
89.47906027	1.792554868	1.048262709	387.3354794	58.69775339	22.69781114	0.188395363	0.574782174
89.54034729	1.792677846	1.048332842	387.4326614	58.70168244	22.69937357	0.188407987	0.574995512
89.60163432	1.792800672	1.048402888	387.5297227	58.70560662	22.70093406	0.188420595	0.575208665
89.66292135	1.792923346	1.048472848	387.6266636	58.70952593	22.70249262	0.188433188	0.575421633
89.72420838	1.793045869	1.04854272	387.7234842	58.71344039	22.70404926	0.188445765	0.575634415
89.7854954	1.79316824	1.048612506	387.8201846	58.71735	22.70560397	0.188458326	0.575847013
89.84678243	1.79329046	1.048682206	387.9167649	58.72125476	22.70715676	0.188470872	0.576059425
89.90806946	1.793412529	1.048751819	388.0132254	58.72515468	22.70870763	0.188483402	0.576271653
89.96935649	1.793534447	1.048821346	388.1095662	58.72904976	22.71025658	0.188495917	0.576483695
90.03064351	1.793656214	1.048890787	388.2057874	58.73294002	22.71180362	0.188508416	0.576695554
90.09193054	1.793777831	1.048960141	388.3018891	58.73682546	22.71334874	0.1885209	0.576907228
90.15321757	1.793899297	1.04902941	388.3978715	58.74070608	22.71489196	0.188533368	0.577118717
90.2145046	1.794020613	1.049098593	388.4937348	58.7445819	22.71643327	0.188545821	0.577330023
90.27579162	1.794141779	1.04916769	388.5894792	58.74845291	22.71797267	0.188558258	0.577541144
90.33707865	1.794262795	1.049236701	388.6851046	58.75231912	22.71951017	0.18857068	0.577752082
90.39836568	1.794383661	1.049305627	388.7806114	58.75618053	22.72104576	0.188583087	0.577962836
90.45965271	1.794504378	1.049374468	388.8759996	58.76003717	22.72257946	0.188595478	0.578173406
90.52093973	1.794624946	1.049443223	388.9712694	58.76388902	22.72411126	0.188607853	0.578383793
90.58222676	1.794745364	1.049511893	389.0664209	58.7677361	22.72564117	0.188620214	0.578593997
90.64351379	1.794865634	1.049580478	389.1614543	58.7715784	22.72716919	0.188632559	0.578804017
90.70480082	1.794985755	1.049648978	389.2563698	58.77541595	22.72869532	0.188644889	0.579013855
90.76608784	1.795105727	1.049717393	389.3511674	58.77924874	22.73021956	0.188657203	0.57922351
90.82737487	1.795225551	1.049785723	389.4458473	58.78307678	22.73174191	0.188669503	0.579432982
90.8886619	1.795345227	1.049853969	389.5404097	58.78690007	22.73326239	0.188681787	0.579642271
90.94994893	1.795464755	1.049922129	389.6348546	58.79071862	22.73478098	0.188694056	0.579851378
91.01123596	1.795584135	1.049990206	389.7291824	58.79453244	22.73629769	0.188706309	0.580060302
91.07252298	1.795703367	1.050058198	389.823393	58.79834153	22.73781253	0.188718548	0.580269045
91.13381001	1.795822452	1.050126106	389.9174866	58.8021459	22.7393255	0.188730771	0.580477605
91.19509704	1.795941389	1.050193929	390.0114635	58.80594555	22.74083659	0.188742979	0.580685983
91.25638407	1.79606018	1.050261669	390.1053236	58.80974049	22.74234582	0.188755172	0.58089418
91.31767109	1.796178823	1.050329324	390.1990672	58.81353073	22.74385318	0.18876735	0.581102195
91.37895812	1.79629732	1.050396896	390.2926944	58.81731627	22.74535868	0.188779512	0.581310029
91.44024515	1.79641567	1.050464384	390.3862054	58.82109711	22.74686231	0.18879166	0.581517681
91.50153218	1.796533874	1.050531788	390.4796003	58.82487327	22.74836408	0.188803793	0.581725152
91.5628192	1.796651931	1.050599109	390.5728792	58.82864475	22.749864	0.18881591	0.581932442
91.62410623	1.796769843	1.050666346	390.6660422	58.83241155	22.75136206	0.188828013	0.582139551
91.68539326	1.796887608	1.0507335	390.7590896	58.83617367	22.75285827	0.1888401	0.582346479
91.74668029	1.797005228	1.05080057	390.8520215	58.83993114	22.75435263	0.188852173	0.582553227
91.80796731	1.797122703	1.050867558	390.9448379	58.84368394	22.75584514	0.18886423	0.582759794
91.86925434	1.797240032	1.050934462	391.0375391	58.84743209	22.7573358	0.188876273	0.582966181
91.93054137	1.797357216	1.051001283	391.1301251	58.8511756	22.75882462	0.188888301	0.583172387
91.9918284	1.797474255	1.051068022	391.2225962	58.85491446	22.7603116	0.188900313	0.583378413
92.05311542	1.797591149	1.051134678	391.3149525	58.85864868	22.76179674	0.188912311	0.58358426
92.11440245	1.797707898	1.051201251	391.407194	58.86237828	22.76328004	0.188924294	0.583789926
92.17568948	1.797824503	1.051267742	391.499321	58.86610325	22.76476151	0.188936262	0.583995413
92.23697651	1.797940964	1.05133415	391.5913336	58.8698236	22.76624114	0.188948216	0.584200721
92.29826353	1.79805728	1.051400476	391.6832319	58.87353933	22.76771894	0.188960154	0.584405848
92.35955056	1.798173453	1.051466719	391.775016	58.87725046	22.76919492	0.188972078	0.584610797
92.42083759	1.798289482	1.051532881	391.8666862	58.88095699	22.77066907	0.188983987	0.584815567
92.48212462	1.798405367	1.05159896	391.9582424	58.88465891	22.77214139	0.188995881	0.585020157
92.54341164	1.798521109	1.051664957	392.049685	58.88835625	22.7736119	0.18900776	0.585224569
92.60469867	1.798636708	1.051730873	392.141014	58.892049	22.77508058	0.189019625	0.585428802
92.6659857	1.798752164	1.051796707	392.2322295	58.89573717	22.77654745	0.189031475	0.585632856
92.72727273	1.798867477	1.051862459	392.3233317	58.89942077	22.7780125	0.18904331	0.585836732
92.78855975	1.798982647	1.051928129	392.4143208	58.90309979	22.77947574	0.18905513	0.586040429
92.84984678	1.799097674	1.051993719	392.5051968	58.90677426	22.78093716	0.189066936	0.586243949
92.91113381	1.799212559	1.052059226	392.5959599	58.91044416	22.78239678	0.189078728	0.58644729
92.97242084	1.799327302	1.052124653	392.6866102	58.91410951	22.7838546	0.189090504	0.586650453
93.03370787	1.799441903	1.052189998	392.777148	58.91777032	22.7853106	0.189102266	0.586853439
93.09499489	1.799556362	1.052255263	392.8675732	58.92142658	22.78676481	0.189114014	0.587056247
93.15628192	1.799670679	1.052320446	392.9578861	58.92507831	22.78821722	0.189125746	0.587258878
93.21756895	1.799784855	1.052385549	393.0480868	58.9287255	22.78966783	0.189137465	0.587461331
93.27885598	1.79989889	1.05245057	393.1381754	58.93236818	22.79111664	0.189149168	0.587663607
93.340143	1.800012783	1.052515511	393.228152	58.93600633	22.79256366	0.189160857	0.587865706
93.40143003	1.800126535	1.052580372	393.3180169	58.93963997	22.79400889	0.189172532	0.588067628
93.46271706	1.800240147	1.052645152	393.40777	58.94326909	22.79545233	0.189184192	0.588269373
93.52400409	1.800353618	1.052709852	393.4974117	58.94689372	22.79689399	0.189195838	0.588470941
93.58529111	1.800466948	1.052774471	393.5869419	58.95051385	22.79833385	0.189207469	0.588672333
93.64657814	1.800580138	1.05283901	393.6763609	58.95412948	22.79977194	0.189219086	0.588873548
93.70786517	1.800693188	1.052903469	393.7656687	58.95774063	22.80120825	0.189230689	0.589074588
93.7691522	1.800806098	1.052967848	393.8548655	58.9613473	22.80264277	0.189242277	0.589275451
93.83043922	1.800918868	1.053032148	393.9439515	58.96494949	22.80407553	0.18925385	0.589476138
93.89172625	1.801031498	1.053096367	394.0329268	58.96854721	22.8055065	0.18926541	0.589676649
93.95301328	1.801143989	1.053160507	394.1217914	58.97214046	22.80693571	0.189276955	0.589876984
94.01430031	1.80125634	1.053224567	394.2105456	58.97572926	22.80836315	0.189288485	0.590077144
94.07558733	1.801368553	1.053288547	394.2991894	58.9793136	22.80978881	0.189300002	0.590277129
94.13687436	1.801480626	1.053352449	394.3877231	58.98289349	22.81121272	0.189311504	0.590476938
94.19816139	1.801592561	1.053416271	394.4761466	58.98646893	22.81263486	0.189322991	0.590676572
94.25944842	1.801704357	1.053480013	394.5644603	58.99003994	22.81405524	0.189334465	0.590876031
94.32073544	1.801816014	1.053543677	394.6526641	58.99360652	22.81547385	0.189345924	0.591075315
94.38202247	1.801927533	1.053607261	394.7407583	58.99716866	22.81689072	0.189357369	0.591274424
94.4433095	1.802038914	1.053670767	394.8287429	59.00072639	22.81830582	0.1893688	0.591473358
94.50459653	1.802150157	1.053734194	394.9166182	59.00427969	22.81971918	0.189380216	0.591672119
94.56588355	1.802261262	1.053797542	395.0043841	59.00782859	22.82113078	0.189391619	0.591870704
94.62717058	1.80237223	1.053860811	395.0920409	59.01137308	22.82254064	0.189403007	0.592069116
94.68845761	1.80248306	1.053924002	395.1795887	59.01491316	22.82394875	0.189414381	0.592267353
94.74974464	1.802593753	1.053987114	395.2670277	59.01844885	22.82535511	0.189425741	0.592465416
94.81103166	1.802704308	1.054050148	395.3543578	59.02198015	22.82675973	0.189437087	0.592663306
94.87231869	1.802814727	1.054113104	395.4415794	59.02550707	22.82816261	0.189448419	0.592861022
94.93360572	1.802925008	1.054175981	395.5286924	59.0290296	22.82956375	0.189459737	0.593058564
94.99489275	1.803035153	1.05423878	395.6156971	59.03254776	22.83096316	0.18947104	0.593255933
95.05617978	1.803145162	1.054301502	395.7025936	59.03606155	22.83236083	0.18948233	0.593453129
95.1174668	1.803255034	1.054364145	395.789382	59.03957097	22.83375678	0.189493605	0.593650151
95.17875383	1.80336477	1.054426711	395.8760624	59.04307603	22.83515099	0.189504867	0.593847
95.24004086	1.80347437	1.054489199	395.9626349	59.04657674	22.83654347	0.189516115	0.594043677
95.30132789	1.803583834	1.054551609	396.0490997	59.0500731	22.83793423	0.189527348	0.594240181
95.36261491	1.803693162	1.054613942	396.135457	59.05356512	22.83932326	0.189538568	0.594436512
95.42390194	1.803802355	1.054676197	396.2217068	59.0570528	22.84071057	0.189549774	0.59463267
95.48518897	1.803911413	1.054738375	396.3078492	59.06053614	22.84209616	0.189560965	0.594828657
95.546476	1.804020335	1.054800476	396.3938845	59.06401516	22.84348004	0.189572143	0.595024471
95.60776302	1.804129131	1.054862505	396.4798208	59.06749016	22.84486231	0.189583308	0.595220111
95.66905005	1.804237794	1.054924458	396.5656512	59.07096089	22.84624289	0.18959446	0.59541558
95.73033708	1.804346323	1.054986334	396.6513752	59.07442732	22.84762177	0.189605597	0.595610877
95.79162411	1.804454717	1.055048134	396.7369927	59.07788945	22.84899893	0.189616721	0.595806002
95.85291113	1.804562978	1.055109856	396.8225039	59.08134729	22.8503744	0.189627831	0.596000955
95.91419816	1.804671104	1.055171503	396.9079091	59.08480084	22.85174816	0.189638927	0.596195737
95.97548519	1.804779097	1.055233073	396.9932083	59.08825012	22.85312023	0.189650009	0.596390347
96.03677222	1.804886956	1.055294566	397.0784016	59.09169512	22.8544906	0.189661078	0.596584787
96.09805924	1.804994681	1.055355984	397.1634891	59.09513585	22.85585927	0.189672133	0.596779055
96.15934627	1.805102274	1.055417325	397.2484711	59.09857231	22.85722625	0.189683174	0.596973152
96.2206333	1.805209733	1.05547859	397.3333476	59.10200452	22.85859155	0.189694201	0.597167079
96.28192033	1.80531706	1.05553978	397.4181188	59.10543247	22.85995515	0.189705215	0.597360835
96.34320735	1.805424254	1.055600893	397.5027847	59.10885618	22.86131707	0.189716215	0.59755442
96.40449438	1.805531315	1.055661931	397.5873456	59.11227564	22.8626773	0.189727202	0.597747835
96.46578141	1.805638244	1.055722893	397.6718015	59.11569086	22.86403585	0.189738175	0.59794108
96.52706844	1.80574504	1.05578378	397.7561526	59.11910185	22.86539272	0.189749134	0.598134154
96.58835546	1.805851704	1.055844591	397.840399	59.12250861	22.86674791	0.18976008	0.598327059
96.64964249	1.805958237	1.055905327	397.9245409	59.12591115	22.86810143	0.189771012	0.598519793
96.71092952	1.806064637	1.055965987	398.0085783	59.12930947	22.86945327	0.189781931	0.598712358
96.77221655	1.806170907	1.056026572	398.0925114	59.13270358	22.87080344	0.189792836	0.598904754
96.83350358	1.806277044	1.056087083	398.1763404	59.13609348	22.87215194	0.189803727	0.599096979
96.8947906	1.80638305	1.056147518	398.2600652	59.13947918	22.87349877	0.189814605	0.599289036
96.95607763	1.806488926	1.056207878	398.3436862	59.14286069	22.87484394	0.18982547	0.599480923
97.01736466	1.80659467	1.056268164	398.4272034	59.146238	22.87618744	0.189836321	0.599672641
97.07865169	1.806700283	1.056328374	398.5106169	59.14961113	22.87752929	0.189847159	0.59986419
97.13993871	1.806805766	1.056388511	398.5939269	59.15298007	22.87886947	0.189857983	0.600055571
97.20122574	1.806911118	1.056448572	398.6771334	59.15634484	22.88020799	0.189868794	0.600246782
97.26251277	1.80701634	1.056508559	398.7602367	59.15970544	22.88154486	0.189879591	0.600437826
97.3237998	1.807121432	1.056568472	398.8432368	59.16306187	22.88288008	0.189890375	0.6006287
97.38508682	1.807226394	1.056628311	398.9261339	59.16641414	22.88421364	0.189901146	0.600819407
97.44637385	1.807331226	1.056688075	399.0089281	59.16976225	22.88554555	0.189911903	0.601009945
97.50766088	1.807435928	1.056747765	399.0916195	59.17310621	22.88687582	0.189922647	0.601200315
97.56894791	1.807540501	1.056807382	399.1742082	59.17644603	22.88820444	0.189933378	0.601390517
97.63023493	1.807644944	1.056866924	399.2566944	59.17978171	22.88953142	0.189944095	0.601580552
97.69152196	1.807749258	1.056926393	399.3390782	59.18311325	22.89085675	0.189954799	0.601770419
97.75280899	1.807853443	1.056985787	399.4213598	59.18644066	22.89218045	0.18996549	0.601960118
97.81409602	1.807957499	1.057045109	399.5035392	59.18976395	22.89350251	0.189976168	0.60214965
97.87538304	1.808061426	1.057104356	399.5856165	59.19308311	22.89482293	0.189986832	0.602339015
97.93667007	1.808165225	1.057163531	399.667592	59.19639816	22.89614172	0.189997483	0.602528212
97.9979571	1.808268895	1.057222631	399.7494657	59.1997091	22.89745888	0.190008121	0.602717243
98.05924413	1.808372437	1.057281659	399.8312378	59.20301594	22.89877441	0.190018746	0.602906106
98.12053115	1.808475851	1.057340613	399.9129083	59.20631867	22.90008831	0.190029357	0.603094803
98.18181818	1.808579137	1.057399495	399.9944774	59.20961731	22.90140058	0.190039956	0.603283334
98.24310521	1.808682295	1.057458303	400.0759452	59.21291186	22.90271124	0.190050541	0.603471698
98.30439224	1.808785326	1.057517038	400.1573119	59.21620232	22.90402027	0.190061113	0.603659895
98.36567926	1.808888229	1.057575701	400.2385775	59.21948871	22.90532768	0.190071672	0.603847927
98.42696629	1.808991004	1.057634291	400.3197423	59.22277101	22.90663347	0.190082218	0.604035792
98.48825332	1.809093653	1.057692808	400.4008062	59.22604925	22.90793765	0.190092751	0.604223491
98.54954035	1.809196174	1.057751253	400.4817695	59.22932342	22.90924021	0.19010327	0.604411025
98.61082737	1.809298568	1.057809625	400.5626323	59.23259353	22.91054116	0.190113777	0.604598393
98.6721144	1.809400836	1.057867924	400.6433946	59.23585959	22.9118405	0.190124271	0.604785595
98.73340143	1.809502977	1.057926152	400.7240566	59.2391216	22.91313823	0.190134751	0.604972632
98.79468846	1.809604992	1.057984307	400.8046185	59.24237955	22.91443436	0.190145219	0.605159503
98.85597549	1.80970688	1.05804239	400.8850803	59.24563347	22.91572888	0.190155674	0.60534621
98.91726251	1.809808643	1.058100401	400.9654422	59.24888336	22.91702181	0.190166115	0.605532751
98.97854954	1.809910279	1.05815834	401.0457043	59.25212921	22.91831313	0.190176544	0.605719128
99.03983657	1.81001179	1.058216208	401.1258667	59.25537103	22.91960285	0.19018696	0.605905339
99.1011236	1.810113175	1.058274003	401.2059295	59.25860884	22.92089098	0.190197363	0.606091386
99.16241062	1.810214434	1.058331727	401.2858929	59.26184263	22.92217751	0.190207753	0.606277269
99.22369765	1.810315568	1.058389379	401.365757	59.2650724	22.92346245	0.19021813	0.606462987
99.28498468	1.810416577	1.05844696	401.4455218	59.26829817	22.9247458	0.190228494	0.60664854
99.34627171	1.810517461	1.058504469	401.5251876	59.27151994	22.92602756	0.190238846	0.60683393
99.40755873	1.81061822	1.058561907	401.6047544	59.27473771	22.92730773	0.190249184	0.607019156
99.46884576	1.810718854	1.058619274	401.6842224	59.27795149	22.92858632	0.19025951	0.607204218
99.53013279	1.810819363	1.058676569	401.7635917	59.28116128	22.92986333	0.190269823	0.607389116
99.59141982	1.810919748	1.058733794	401.8428624	59.28436709	22.93113875	0.190280123	0.60757385
99.65270684	1.811020009	1.058790947	401.9220345	59.28756893	22.9324126	0.19029041	0.607758421
99.71399387	1.811120146	1.05884803	402.0011084	59.29076679	22.93368487	0.190300685	0.607942828
99.7752809	1.811220158	1.058905041	402.0800839	59.29396068	22.93495556	0.190310947	0.608127073
99.83656793	1.811320047	1.058961982	402.1589614	59.29715061	22.93622468	0.190321196	0.608311154
99.89785495	1.811419812	1.059018853	402.2377408	59.30033658	22.93749223	0.190331432	0.608495072
99.95914198	1.811519454	1.059075652	402.3164224	59.30351859	22.93875821	0.190341656	0.608678827
100.020429	1.811618972	1.059132382	402.3950062	59.30669666	22.94002262	0.190351867	0.60886242
100.081716	1.811718367	1.059189041	402.4734923	59.30987078	22.94128547	0.190362065	0.60904585
100.1430031	1.811817638	1.059245629	402.5518809	59.31304097	22.94254675	0.190372251	0.609229118
100.2042901	1.811916787	1.059302147	402.6301721	59.31620722	22.94380647	0.190382424	0.609412223
100.2655771	1.812015813	1.059358596	402.708366	59.31936954	22.94506463	0.190392584	0.609595166
100.3268641	1.812114716	1.059414974	402.7864627	59.32252793	22.94632123	0.190402732	0.609777947
100.3881512	1.812213497	1.059471282	402.8644624	59.32568241	22.94757628	0.190412867	0.609960566
100.4494382	1.812312155	1.05952752	402.9423651	59.32883297	22.94882977	0.190422989	0.610143023
100.5107252	1.812410692	1.059583689	403.020171	59.33197961	22.95008171	0.190433099	0.610325318
100.5720123	1.812509106	1.059639787	403.0978801	59.33512236	22.9513321	0.190443197	0.610507452
100.6332993	1.812607398	1.059695817	403.1754927	59.3382612	22.95258094	0.190453282	0.610689424
100.6945863	1.812705568	1.059751776	403.2530088	59.34139614	22.95382823	0.190463354	0.610871236
100.7558733	1.812803617	1.059807666	403.3304286	59.34452719	22.95507397	0.190473414	0.611052885
100.8171604	1.812901544	1.059863487	403.4077521	59.34765435	22.95631818	0.190483462	0.611234374
100.8784474	1.81299935	1.059919238	403.4849794	59.35077764	22.95756084	0.190493497	0.611415702
100.9397344	1.813097035	1.05997492	403.5621108	59.35389704	22.95880196	0.190503519	0.611596869
101.0010215	1.813194599	1.060030534	403.6391462	59.35701257	22.96004154	0.190513529	0.611777876
101.0623085	1.813292041	1.060086078	403.7160859	59.36012423	22.96127959	0.190523527	0.611958722
101.1235955	1.813389363	1.060141553	403.7929298	59.36323202	22.96251611	0.190533512	0.612139407
101.1848825	1.813486565	1.060196959	403.8696783	59.36633596	22.96375109	0.190543485	0.612319932
101.2461696	1.813583646	1.060252296	403.9463313	59.36943604	22.96498454	0.190553445	0.612500297
101.3074566	1.813680606	1.060307565	404.0228889	59.37253227	22.96621646	0.190563393	0.612680502
101.3687436	1.813777447	1.060362765	404.0993514	59.37562466	22.96744686	0.190573329	0.612860547
101.4300306	1.813874167	1.060417896	404.1757188	59.3787132	22.96867573	0.190583252	0.613040432
101.4913177	1.813970767	1.060472959	404.2519911	59.38179791	22.96990308	0.190593163	0.613220158
101.5526047	1.814067248	1.060527953	404.3281686	59.38487878	22.9711289	0.190603062	0.613399724
101.6138917	1.814163609	1.06058288	404.4042514	59.38795583	22.97235321	0.190612948	0.61357913
101.6751788	1.814259851	1.060637738	404.4802395	59.39102906	22.973576	0.190622822	0.613758377
101.7364658	1.814355973	1.060692527	404.5561331	59.39409846	22.97479727	0.190632684	0.613937465
101.7977528	1.814451976	1.060747249	404.6319322	59.39716406	22.97601703	0.190642534	0.614116394
101.8590398	1.81454786	1.060801903	404.7076371	59.40022584	22.97723528	0.190652371	0.614295165
101.9203269	1.814643625	1.060856489	404.7832477	59.40328382	22.97845201	0.190662196	0.614473776
101.9816139	1.814739271	1.060911007	404.8587643	59.406338	22.97966724	0.190672009	0.614652229
102.0429009	1.814834799	1.060965457	404.9341869	59.40938838	22.98088096	0.19068181	0.614830523
102.1041879	1.814930208	1.06101984	405.0095157	59.41243497	22.98209318	0.190691598	0.615008658
102.165475	1.815025499	1.061074155	405.0847507	59.41547778	22.98330389	0.190701375	0.615186636
102.226762	1.815120677	1.061128405	405.1598966	59.41851698	22.98451317	0.19071114	0.615364455
102.288049	1.815215747	1.061182595	405.2349575	59.42155276	22.98572108	0.190720893	0.615542115
102.3493361	1.8153107	1.061236717	405.3099255	59.42458477	22.98692749	0.190730635	0.615719617
102.4106231	1.815405535	1.061290773	405.3848006	59.42761304	22.98813242	0.190740365	0.615896961
102.4719101	1.815500254	1.061344761	405.4595829	59.43063755	22.98933586	0.190750082	0.616074148
102.5331971	1.815594855	1.061398683	405.5342726	59.43365833	22.99053781	0.190759788	0.616251177
102.5944842	1.81568934	1.061452538	405.6088697	59.43667537	22.99173828	0.190769482	0.616428049
102.6557712	1.815783707	1.061506327	405.6833744	59.43968867	22.99293726	0.190779163	0.616604763
102.7170582	1.815877959	1.061560048	405.7577869	59.44269824	22.99413477	0.190788833	0.61678132
102.7783453	1.815972093	1.061613704	405.8321071	59.4457041	22.99533079	0.19079849	0.61695772
102.8396323	1.816066112	1.061667293	405.9063353	59.44870623	22.99652534	0.190808136	0.617133963
102.9009193	1.816160015	1.061720816	405.9804715	59.45170465	22.99771842	0.19081777	0.617310049
102.9622063	1.816253801	1.061774272	406.0545159	59.45469936	22.99891002	0.190827392	0.617485979
103.0234934	1.816347472	1.061827663	406.1284686	59.45769036	23.00010015	0.190837002	0.617661752
103.0847804	1.816441027	1.061880987	406.2023296	59.46067766	23.00128881	0.1908466	0.617837369
103.1460674	1.816534466	1.061934245	406.2760992	59.46366127	23.002476	0.190856186	0.618012829
103.2073544	1.81662779	1.061987438	406.3497773	59.46664118	23.00366172	0.19086576	0.618188133
103.2686415	1.816720999	1.062040564	406.4233642	59.46961741	23.00484598	0.190875323	0.618363281
103.3299285	1.816814092	1.062093625	406.49686	59.47258995	23.00602878	0.190884873	0.618538273
103.3912155	1.816907071	1.062146621	406.5702647	59.47555882	23.00721012	0.190894412	0.618713109
103.4525026	1.816999935	1.06219955	406.6435784	59.47852402	23.00839	0.190903939	0.618887789
103.5137896	1.817092684	1.062252415	406.7168014	59.48148554	23.00956842	0.190913454	0.619062314
103.5750766	1.817185319	1.062305213	406.7899336	59.4844434	23.01074539	0.190922958	0.619236684
103.6363636	1.817277839	1.062357947	406.8629753	59.48739761	23.0119209	0.19093245	0.619410898
103.6976507	1.817370245	1.062410615	406.9359265	59.49034815	23.01309496	0.19094193	0.619584956
103.7589377	1.817462536	1.062463218	407.0087873	59.49329505	23.01426758	0.190951398	0.61975886
103.8202247	1.817554714	1.062515757	407.0815579	59.4962383	23.01543874	0.190960854	0.619932609
103.8815117	1.817646778	1.06256823	407.1542383	59.49917791	23.01660846	0.190970299	0.620106203
103.9427988	1.817738728	1.062620638	407.2268287	59.50211388	23.01777673	0.190979732	0.620279642
104.0040858	1.817830565	1.062672981	407.2993292	59.50504622	23.01894356	0.190989154	0.620452927
104.0653728	1.817922288	1.06272526	407.3717399	59.50797494	23.02010895	0.190998564	0.620626057
104.1266599	1.818013898	1.062777474	407.4440609	59.51090003	23.0212729	0.191007962	0.620799033
104.1879469	1.818105395	1.062829623	407.5162923	59.5138215	23.02243542	0.191017348	0.620971854
104.2492339	1.818196779	1.062881708	407.5884342	59.51673935	23.02359649	0.191026723	0.621144522
104.3105209	1.81828805	1.062933728	407.6604868	59.5196536	23.02475614	0.191036086	0.621317035
104.371808	1.818379208	1.062985684	407.7324502	59.52256424	23.02591435	0.191045438	0.621489395
104.433095	1.818470254	1.063037576	407.8043243	59.52547128	23.02707113	0.191054778	0.621661601
104.494382	1.818561187	1.063089403	407.8761095	59.52837472	23.02822648	0.191064107	0.621833653
104.5556691	1.818652008	1.063141167	407.9478057	59.53127457	23.02938041	0.191073424	0.622005552
104.6169561	1.818742717	1.063192866	408.0194132	59.53417083	23.03053291	0.19108273	0.622177298
104.6782431	1.818833313	1.063244501	408.0909319	59.53706351	23.03168399	0.191092024	0.62234889
104.7395301	1.818923798	1.063296073	408.1623621	59.53995261	23.03283365	0.191101306	0.622520329
104.8008172	1.819014171	1.063347581	408.2337037	59.54283814	23.03398188	0.191110577	0.622691615
104.8621042	1.819104432	1.063399025	408.304957	59.5457201	23.0351287	0.191119837	0.622862748
104.9233912	1.819194582	1.063450405	408.3761221	59.54859849	23.03627411	0.191129085	0.623033728
104.9846782	1.819284621	1.063501722	408.4471989	59.55147332	23.03741809	0.191138322	0.623204556
105.0459653	1.819374548	1.063552975	408.5181878	59.55434459	23.03856067	0.191147547	0.623375231
105.1072523	1.819464365	1.063604165	408.5890887	59.55721231	23.03970183	0.191156761	0.623545754
105.1685393	1.81955407	1.063655292	408.6599017	59.56007648	23.04084159	0.191165963	0.623716125
105.2298264	1.819643665	1.063706355	408.7306271	59.56293711	23.04197994	0.191175154	0.623886343
105.2911134	1.819733148	1.063757355	408.8012648	59.5657942	23.04311688	0.191184334	0.62405641
105.3524004	1.819822522	1.063808292	408.8718151	59.56864775	23.04425242	0.191193502	0.624226324
105.4136874	1.819911785	1.063859166	408.9422779	59.57149777	23.04538655	0.191202659	0.624396087
105.4749745	1.820000937	1.063909977	409.0126535	59.57434427	23.04651929	0.191211805	0.624565698
105.5362615	1.82008998	1.063960726	409.0829418	59.57718724	23.04765062	0.191220939	0.624735158
105.5975485	1.820178913	1.064011411	409.1531431	59.5800267	23.04878056	0.191230062	0.624904466
105.6588355	1.820267735	1.064062034	409.2232575	59.58286264	23.0499091	0.191239174	0.625073623
105.7201226	1.820356448	1.064112594	409.2932849	59.58569508	23.05103625	0.191248274	0.625242628
105.7814096	1.820445052	1.064163091	409.3632257	59.58852401	23.05216201	0.191257364	0.625411483
105.8426966	1.820533546	1.064213527	409.4330797	59.59134943	23.05328637	0.191266442	0.625580186
105.9039837	1.82062193	1.064263899	409.5028473	59.59417137	23.05440935	0.191275508	0.625748739
105.9652707	1.820710206	1.064314209	409.5725284	59.59698981	23.05553094	0.191284564	0.625917141
106.0265577	1.820798372	1.064364458	409.6421231	59.59980476	23.05665114	0.191293608	0.626085393
106.0878447	1.82088643	1.064414643	409.7116316	59.60261623	23.05776996	0.191302641	0.626253494
106.1491318	1.820974378	1.064464767	409.7810541	59.60542422	23.0588874	0.191311663	0.626421445
106.2104188	1.821062218	1.064514829	409.8503905	59.60822873	23.06000346	0.191320674	0.626589245
106.2717058	1.82114995	1.064564829	409.919641	59.61102977	23.06111814	0.191329673	0.626756896
106.3329928	1.821237573	1.064614767	409.9888056	59.61382735	23.06223144	0.191338662	0.626924396
106.3942799	1.821325088	1.064664643	410.0578846	59.61662146	23.06334337	0.191347639	0.627091747
106.4555669	1.821412494	1.064714457	410.126878	59.61941212	23.06445392	0.191356606	0.627258947
106.5168539	1.821499793	1.06476421	410.1957859	59.62219932	23.0655631	0.191365561	0.627425999
106.578141	1.821586984	1.064813901	410.2646084	59.62498308	23.06667091	0.191374505	0.627592901
106.639428	1.821674067	1.064863531	410.3333457	59.62776338	23.06777736	0.191383438	0.627759653
106.700715	1.821761043	1.064913099	410.4019977	59.63054025	23.06888243	0.19139236	0.627926256
106.762002	1.821847911	1.064962606	410.4705647	59.63331368	23.06998614	0.191401271	0.62809271
106.8232891	1.821934671	1.065012052	410.5390467	59.63608367	23.07108849	0.19141017	0.628259015
106.8845761	1.822021325	1.065061436	410.6074438	59.63885024	23.07218947	0.191419059	0.628425171
106.9458631	1.822107871	1.065110759	410.6757562	59.64161338	23.0732891	0.191427937	0.628591179
107.0071502	1.82219431	1.065160022	410.7439839	59.6443731	23.07438736	0.191436804	0.628757037
107.0684372	1.822280643	1.065209223	410.8121271	59.64712941	23.07548427	0.19144566	0.628922747
107.1297242	1.822366869	1.065258363	410.8801857	59.6498823	23.07657982	0.191454505	0.629088309
107.1910112	1.822452988	1.065307443	410.9481601	59.65263178	23.07767402	0.191463339	0.629253723
107.2522983	1.822539001	1.065356461	411.0160501	59.65537786	23.07876687	0.191472162	0.629418988
107.3135853	1.822624907	1.06540542	411.0838561	59.65812054	23.07985836	0.191480974	0.629584105
107.3748723	1.822710708	1.065454317	411.1515779	59.66085983	23.08094851	0.191489775	0.629749074
107.4361593	1.822796402	1.065503154	411.2192159	59.66359572	23.08203731	0.191498565	0.629913896
107.4974464	1.82288199	1.06555193	411.2867699	59.66632822	23.08312476	0.191507345	0.630078569
107.5587334	1.822967473	1.065600646	411.3542402	59.66905735	23.08421087	0.191516113	0.630243096
107.6200204	1.82305285	1.065649302	411.4216269	59.67178309	23.08529563	0.191524871	0.630407474
107.6813075	1.823138121	1.065697898	411.4889301	59.67450545	23.08637906	0.191533618	0.630571706
107.7425945	1.823223287	1.065746433	411.5561497	59.67722445	23.08746115	0.191542354	0.63073579
107.8038815	1.823308348	1.065794908	411.6232861	59.67994008	23.0885419	0.191551079	0.630899727
107.8651685	1.823393303	1.065843323	411.6903392	59.68265234	23.08962131	0.191559793	0.631063517
107.9264556	1.823478153	1.065891679	411.7573091	59.68536124	23.09069939	0.191568497	0.63122716
107.9877426	1.823562899	1.065939974	411.824196	59.68806679	23.09177613	0.19157719	0.631390657
108.0490296	1.823647539	1.065988209	411.891	59.69076899	23.09285154	0.191585872	0.631554006
108.1103166	1.823732075	1.066036385	411.9577211	59.69346784	23.09392563	0.191594543	0.63171721
108.1716037	1.823816507	1.066084501	412.0243595	59.69616335	23.09499838	0.191603203	0.631880266
108.2328907	1.823900834	1.066132558	412.0909152	59.69885552	23.09606981	0.191611853	0.632043177
108.2941777	1.823985056	1.066180555	412.1573884	59.70154435	23.09713992	0.191620492	0.632205942
108.3554648	1.824069175	1.066228492	412.2237791	59.70422985	23.0982087	0.191629121	0.63236856
108.4167518	1.824153189	1.06627637	412.2900874	59.70691203	23.09927616	0.191637738	0.632531032
108.4780388	1.8242371	1.066324189	412.3563136	59.70959088	23.1003423	0.191646345	0.632693359
108.5393258	1.824320907	1.066371949	412.4224575	59.71226641	23.10140712	0.191654942	0.63285554
108.6006129	1.82440461	1.066419649	412.4885194	59.71493862	23.10247062	0.191663527	0.633017576
108.6618999	1.824488209	1.06646729	412.5544993	59.71760753	23.10353281	0.191672102	0.633179466
108.7231869	1.824571705	1.066514872	412.6203974	59.72027312	23.10459368	0.191680667	0.63334121
108.784474	1.824655098	1.066562396	412.6862137	59.72293542	23.10565324	0.191689221	0.63350281
108.845761	1.824738388	1.06660986	412.7519484	59.72559441	23.10671149	0.191697764	0.633664264
108.907048	1.824821574	1.066657265	412.8176014	59.72825011	23.10776843	0.191706296	0.633825573
108.968335	1.824904658	1.066704612	412.883173	59.73090251	23.10882406	0.191714819	0.633986738
109.0296221	1.824987639	1.0667519	412.9486632	59.73355163	23.10987839	0.19172333	0.634147757
109.0909091	1.825070517	1.06679913	413.0140721	59.73619746	23.11093141	0.191731831	0.634308633
109.1521961	1.825153292	1.0668463	413.0793999	59.73884001	23.11198313	0.191740321	0.634469363
109.2134831	1.825235965	1.066893413	413.1446465	59.74147929	23.11303355	0.191748801	0.634629949
109.2747702	1.825318536	1.066940467	413.2098122	59.74411529	23.11408266	0.191757271	0.634790391
109.3360572	1.825401004	1.066987463	413.2748969	59.74674803	23.11513048	0.191765729	0.634950689
109.3973442	1.82548337	1.0670344	413.3399009	59.7493775	23.116177	0.191774178	0.635110843
109.4586313	1.825565635	1.067081279	413.4048241	59.7520037	23.11722223	0.191782616	0.635270852
109.5199183	1.825647797	1.0671281	413.4696668	59.75462666	23.11826616	0.191791043	0.635430718
109.5812053	1.825729858	1.067174863	413.5344289	59.75724635	23.1193088	0.19179946	0.635590441
109.6424923	1.825811817	1.067221568	413.5991105	59.7598628	23.12035015	0.191807866	0.635750019
109.7037794	1.825893675	1.067268215	413.6637119	59.762476	23.1213902	0.191816263	0.635909455
109.7650664	1.825975431	1.067314804	413.728233	59.76508596	23.12242898	0.191824648	0.636068746
109.8263534	1.826057086	1.067361335	413.792674	59.76769269	23.12346646	0.191833023	0.636227895
109.8876404	1.82613864	1.067407809	413.8570349	59.77029617	23.12450266	0.191841388	0.636386901
109.9489275	1.826220093	1.067454225	413.9213159	59.77289643	23.12553757	0.191849743	0.636545763
110.0102145	1.826301444	1.067500583	413.985517	59.77549346	23.12657121	0.191858087	0.636704483
110.0715015	1.826382696	1.067546884	414.0496383	59.77808727	23.12760356	0.191866421	0.63686306
110.1327886	1.826463846	1.067593128	414.11368	59.78067785	23.12863464	0.191874744	0.637021494
110.1940756	1.826544896	1.067639313	414.177642	59.78326523	23.12966443	0.191883057	0.637179786
110.2553626	1.826625845	1.067685442	414.2415246	59.78584939	23.13069295	0.19189136	0.637337935
110.3166496	1.826706694	1.067731513	414.3053278	59.78843034	23.1317202	0.191899653	0.637495942
110.3779367	1.826787443	1.067777528	414.3690517	59.79100808	23.13274617	0.191907935	0.637653807
110.4392237	1.826868092	1.067823485	414.4326963	59.79358263	23.13377087	0.191916207	0.637811529
110.5005107	1.826948641	1.067869385	414.4962619	59.79615398	23.1347943	0.191924468	0.63796911
110.5617978	1.82702909	1.067915228	414.5597484	59.79872214	23.13581647	0.19193272	0.638126549
110.6230848	1.827109439	1.067961014	414.623156	59.8012871	23.13683736	0.191940961	0.638283846
110.6843718	1.827189689	1.068006743	414.6864847	59.80384888	23.13785699	0.191949192	0.638441002
110.7456588	1.827269839	1.068052415	414.7497347	59.80640748	23.13887536	0.191957412	0.638598016
110.8069459	1.827349889	1.068098031	414.812906	59.8089629	23.13989246	0.191965623	0.638754889
110.8682329	1.827429841	1.06814359	414.8759987	59.81151514	23.1409083	0.191973823	0.63891162
110.9295199	1.827509693	1.068189092	414.9390129	59.81406422	23.14192288	0.191982013	0.63906821
110.9908069	1.827589446	1.068234538	415.0019488	59.81661012	23.14293621	0.191990193	0.63922466
111.052094	1.8276691	1.068279927	415.0648063	59.81915286	23.14394827	0.191998362	0.639380968
111.113381	1.827748655	1.06832526	415.1275856	59.82169244	23.14495908	0.192006522	0.639537136
111.174668	1.827828112	1.068370537	415.1902868	59.82422887	23.14596864	0.192014671	0.639693163
111.2359551	1.82790747	1.068415757	415.25291	59.82676214	23.14697694	0.192022811	0.639849049
111.2972421	1.827986729	1.068460921	415.3154552	59.82929226	23.14798399	0.19203094	0.640004795
111.3585291	1.828065891	1.068506029	415.3779226	59.83181923	23.1489898	0.192039059	0.6401604
111.4198161	1.828144953	1.068551081	415.4403121	59.83434307	23.14999435	0.192047168	0.640315866
111.4811032	1.828223918	1.068596077	415.502624	59.83686376	23.15099766	0.192055267	0.640471191
111.5423902	1.828302785	1.068641017	415.5648583	59.83938132	23.15199972	0.192063355	0.640626376
111.6036772	1.828381553	1.0686859	415.6270152	59.84189574	23.15300053	0.192071434	0.640781421
111.6649642	1.828460224	1.068730729	415.6890945	59.84440704	23.15400011	0.192079503	0.640936327
111.7262513	1.828538797	1.068775501	415.7510966	59.84691521	23.15499844	0.192087561	0.641091092
111.7875383	1.828617273	1.068820218	415.8130214	59.84942027	23.15599553	0.19209561	0.641245719
111.8488253	1.828695651	1.068864879	415.8748691	59.8519222	23.15699139	0.192103649	0.641400206
111.9101124	1.828773932	1.068909484	415.9366397	59.85442102	23.15798601	0.192111677	0.641554553
111.9713994	1.828852115	1.068954034	415.9983333	59.85691673	23.15897939	0.192119696	0.641708761
112.0326864	1.828930201	1.068998528	416.05995	59.85940933	23.15997153	0.192127704	0.641862831
112.0939734	1.829008191	1.069042967	416.1214899	59.86189883	23.16096245	0.192135703	0.642016761
112.1552605	1.829086083	1.069087351	416.1829531	59.86438523	23.16195213	0.192143692	0.642170552
112.2165475	1.829163878	1.069131679	416.2443397	59.86686853	23.16294058	0.19215167	0.642324205
112.2778345	1.829241577	1.069175952	416.3056497	59.86934874	23.16392781	0.192159639	0.642477719
112.3391216	1.829319179	1.069220171	416.3668833	59.87182586	23.1649138	0.192167598	0.642631095
112.4004086	1.829396685	1.069264333	416.4280404	59.87429989	23.16589857	0.192175547	0.642784332
112.4616956	1.829474094	1.069308441	416.4891213	59.87677084	23.16688212	0.192183486	0.642937431
112.5229826	1.829551407	1.069352494	416.550126	59.87923872	23.16786444	0.192191415	0.643090391
112.5842697	1.829628623	1.069396492	416.6110546	59.88170351	23.16884554	0.192199334	0.643243214
112.6455567	1.829705744	1.069440436	416.6719071	59.88416523	23.16982542	0.192207244	0.643395898
112.7068437	1.829782768	1.069484324	416.7326836	59.88662389	23.17080408	0.192215143	0.643548445
112.7681307	1.829859697	1.069528158	416.7933843	59.88907947	23.17178152	0.192223033	0.643700854
112.8294178	1.82993653	1.069571937	416.8540093	59.891532	23.17275775	0.192230913	0.643853126
112.8907048	1.830013267	1.069615661	416.9145585	59.89398146	23.17373276	0.192238783	0.64400526
112.9519918	1.830089909	1.069659331	416.9750321	59.89642787	23.17470655	0.192246643	0.644157256
113.0132789	1.830166456	1.069702947	417.0354302	59.89887123	23.17567914	0.192254493	0.644309115
113.0745659	1.830242907	1.069746508	417.0957528	59.90131154	23.17665051	0.192262334	0.644460837
113.1358529	1.830319262	1.069790014	417.156	59.90374881	23.17762067	0.192270165	0.644612423
113.1971399	1.830395523	1.069833467	417.216172	59.90618303	23.17858963	0.192277986	0.644763871
113.258427	1.830471688	1.069876865	417.2762688	59.90861421	23.17955737	0.192285797	0.644915182
113.319714	1.830547759	1.069920209	417.3362904	59.91104236	23.18052392	0.192293599	0.645066356
113.381001	1.830623735	1.069963499	417.396237	59.91346748	23.18148925	0.19230139	0.645217394
113.442288	1.830699616	1.070006734	417.4561087	59.91588956	23.18245339	0.192309172	0.645368296
113.5035751	1.830775403	1.070049916	417.5159055	59.91830862	23.18341632	0.192316945	0.645519061
113.5648621	1.830851095	1.070093044	417.5756275	59.92072466	23.18437805	0.192324707	0.64566969
113.6261491	1.830926692	1.070136118	417.6352748	59.92313768	23.18533858	0.19233246	0.645820183
113.6874362	1.831002196	1.070179138	417.6948474	59.92554769	23.18629791	0.192340204	0.645970539
113.7487232	1.831077605	1.070222104	417.7543456	59.92795468	23.18725605	0.192347937	0.64612076
113.8100102	1.83115292	1.070265017	417.8137692	59.93035866	23.18821299	0.192355661	0.646270845
113.8712972	1.831228141	1.070307876	417.8731185	59.93275964	23.18916874	0.192363375	0.646420794
113.9325843	1.831303268	1.070350681	417.9323934	59.93515761	23.1901233	0.19237108	0.646570608
113.9938713	1.831378301	1.070393433	417.9915942	59.93755259	23.19107666	0.192378775	0.646720286
114.0551583	1.831453241	1.070436132	418.0507208	59.93994457	23.19202883	0.19238646	0.646869828
114.1164454	1.831528087	1.070478777	418.1097733	59.94233355	23.19297982	0.192394136	0.647019236
114.1777324	1.83160284	1.070521368	418.1687518	59.94471955	23.19392961	0.192401802	0.647168508
114.2390194	1.831677499	1.070563906	418.2276565	59.94710256	23.19487822	0.192409458	0.647317645
114.3003064	1.831752065	1.070606391	418.2864873	59.94948259	23.19582565	0.192417105	0.647466648
114.3615935	1.831826569	1.070648842	418.3452707	59.95186069	23.19677229	0.192424746	0.647615514
114.4228805	1.831901002	1.070691253	418.4039984	59.95423654	23.19771803	0.192432379	0.647764245
114.4841675	1.831975343	1.070733611	418.4626535	59.95660945	23.19866259	0.192440003	0.647912841
114.5454545	1.832049593	1.070775916	418.521236	59.95897944	23.19960599	0.192447618	0.648061303
114.6067416	1.832123751	1.07081817	418.5797461	59.96134649	23.20054823	0.192455223	0.64820963
114.6680286	1.832197817	1.070860371	418.6381839	59.96371062	23.20148931	0.192462819	0.648357823
114.7293156	1.832271792	1.07090252	418.6965494	59.96607183	23.20242922	0.192470405	0.648505881
114.7906027	1.832345676	1.070944617	418.7548428	59.96843013	23.20336798	0.192477983	0.648653806
114.8518897	1.832419468	1.070986662	418.813064	59.97078551	23.20430558	0.19248555	0.648801597
114.9131767	1.83249317	1.071028655	418.8712133	59.97313798	23.20524202	0.192493109	0.648949253
114.9744637	1.832566781	1.071070597	418.9292906	59.97548755	23.20617731	0.192500658	0.649096776
115.0357508	1.8326403	1.071112486	418.9872962	59.97783421	23.20711144	0.192508197	0.649244166
115.0970378	1.83271373	1.071154324	419.04523	59.98017797	23.20804442	0.192515728	0.649391422
115.1583248	1.832787068	1.07119611	419.1030922	59.98251884	23.20897625	0.192523249	0.649538544
115.2196118	1.832860316	1.071237844	419.1608828	59.98485682	23.20990693	0.192530761	0.649685533
115.2808989	1.832933474	1.071279527	419.2186019	59.98719191	23.21083646	0.192538263	0.649832389
115.3421859	1.833006541	1.071321158	419.2762497	59.98952411	23.21176485	0.192545756	0.649979112
115.4034729	1.833079518	1.071362738	419.3338261	59.99185344	23.21269209	0.19255324	0.650125701
115.46476	1.833152406	1.071404267	419.3913314	59.99417988	23.21361818	0.192560715	0.650272158
115.526047	1.833225203	1.071445744	419.4487655	59.99650345	23.21454314	0.192568181	0.650418482
115.587334	1.83329791	1.07148717	419.5061286	59.99882415	23.21546695	0.192575637	0.650564674
115.648621	1.833370528	1.071528545	419.5634208	60.00114198	23.21638962	0.192583084	0.650710733
115.7099081	1.833443056	1.071569869	419.620642	60.00345695	23.21731116	0.192590522	0.650856659
115.7711951	1.833515495	1.071611141	419.6777925	60.00576906	23.21823155	0.192597951	0.651002453
115.8324821	1.833587844	1.071652363	419.7348723	60.00807831	23.21915081	0.19260537	0.651148115
115.8937692	1.833660104	1.071693534	419.7918815	60.0103847	23.22006894	0.19261278	0.651293645
115.9550562	1.833732275	1.071734654	419.8488202	60.01268825	23.22098594	0.192620182	0.651439043
116.0163432	1.833804357	1.071775723	419.9056885	60.01498895	23.2219018	0.192627574	0.651584309
116.0776302	1.83387635	1.071816741	419.9624864	60.01728681	23.22281653	0.192634957	0.651729443
116.1389173	1.833948254	1.071857708	420.019214	60.01958182	23.22373013	0.19264233	0.651874445
116.2002043	1.834020069	1.071898625	420.0758714	60.02187401	23.22464261	0.192649695	0.652019316
116.2614913	1.834091795	1.071939492	420.1324588	60.02416335	23.22555396	0.192657051	0.652164056
116.3227783	1.834163433	1.071980308	420.1889761	60.02644987	23.22646419	0.192664397	0.652308664
116.3840654	1.834234983	1.072021073	420.2454235	60.02873356	23.22737329	0.192671734	0.652453141
116.4453524	1.834306444	1.072061788	420.3018011	60.03101443	23.22828127	0.192679063	0.652597486
116.5066394	1.834377817	1.072102453	420.3581089	60.03329248	23.22918813	0.192686382	0.652741701
116.5679265	1.834449102	1.072143067	420.414347	60.03556771	23.23009387	0.192693692	0.652885785
116.6292135	1.834520299	1.072183632	420.4705156	60.03784013	23.23099849	0.192700993	0.653029737
116.6905005	1.834591408	1.072224146	420.5266146	60.04010975	23.23190199	0.192708286	0.65317356
116.7517875	1.834662429	1.07226461	420.5826442	60.04237655	23.23280438	0.192715569	0.653317251
116.8130746	1.834733363	1.072305024	420.6386044	60.04464056	23.23370566	0.192722843	0.653460812
116.8743616	1.834804209	1.072345388	420.6944954	60.04690176	23.23460582	0.192730108	0.653604243
116.9356486	1.834874967	1.072385702	420.7503172	60.04916017	23.23550487	0.192737364	0.653747543
116.9969356	1.834945638	1.072425966	420.80607	60.05141578	23.23640281	0.192744611	0.653890714
117.0582227	1.835016222	1.072466181	420.8617537	60.05366861	23.23729964	0.192751849	0.654033754
117.1195097	1.835086719	1.072506345	420.9173685	60.05591865	23.23819537	0.192759079	0.654176664
117.1807967	1.835157128	1.072546461	420.9729144	60.05816591	23.23908999	0.192766299	0.654319445
117.2420838	1.835227451	1.072586526	421.0283916	60.06041039	23.2399835	0.19277351	0.654462095
117.3033708	1.835297687	1.072626542	421.0838001	60.06265209	23.24087591	0.192780713	0.654604616
117.3646578	1.835367836	1.072666508	421.1391399	60.06489102	23.24176722	0.192787907	0.654747008
117.4259448	1.835437898	1.072706425	421.1944113	60.06712718	23.24265743	0.192795091	0.65488927
117.4872319	1.835507874	1.072746293	421.2496142	60.06936057	23.24354653	0.192802267	0.655031403
117.5485189	1.835577763	1.072786111	421.3047488	60.07159121	23.24443454	0.192809434	0.655173406
117.6098059	1.835647566	1.072825881	421.3598151	60.07381908	23.24532146	0.192816592	0.655315281
117.671093	1.835717283	1.0728656	421.4148132	60.0760442	23.24620727	0.192823741	0.655457026
117.73238	1.835786913	1.072905271	421.4697432	60.07826656	23.247092	0.192830881	0.655598643
117.793667	1.835856458	1.072944893	421.5246051	60.08048617	23.24797563	0.192838013	0.655740131
117.854954	1.835925917	1.072984466	421.5793991	60.08270304	23.24885816	0.192845136	0.65588149
117.9162411	1.83599529	1.073023989	421.6341253	60.08491716	23.24973961	0.192852249	0.656022721
117.9775281	1.836064577	1.073063464	421.6887836	60.08712855	23.25061997	0.192859355	0.656163823
118.0388151	1.836133778	1.07310289	421.7433742	60.08933719	23.25149924	0.192866451	0.656304797
118.1001021	1.836202894	1.073142267	421.7978972	60.09154311	23.25237742	0.192873538	0.656445642
118.1613892	1.836271924	1.073181595	421.8523526	60.09374629	23.25325452	0.192880617	0.65658636
118.2226762	1.83634087	1.073220875	421.9067406	60.09594675	23.25413053	0.192887687	0.656726949
118.2839632	1.83640973	1.073260106	421.9610611	60.09814448	23.25500546	0.192894748	0.656867411
118.3452503	1.836478504	1.073299289	422.0153144	60.10033949	23.25587931	0.192901801	0.657007745
118.4065373	1.836547194	1.073338423	422.0695004	60.10253179	23.25675208	0.192908844	0.657147951
118.4678243	1.836615799	1.073377508	422.1236193	60.10472137	23.25762377	0.192915879	0.657288029
118.5291113	1.836684319	1.073416546	422.177671	60.10690823	23.25849439	0.192922906	0.65742798
118.5903984	1.836752754	1.073455534	422.2316558	60.10909239	23.25936392	0.192929923	0.657567803
118.6516854	1.836821105	1.073494475	422.2855737	60.11127385	23.26023238	0.192936932	0.6577075
118.7129724	1.836889371	1.073533367	422.3394247	60.1134526	23.26109977	0.192943932	0.657847069
118.7742594	1.836957553	1.073572211	422.3932089	60.11562866	23.26196608	0.192950924	0.65798651
118.8355465	1.83702565	1.073611008	422.4469265	60.11780202	23.26283132	0.192957907	0.658125825
118.8968335	1.837093663	1.073649756	422.5005774	60.11997269	23.2636955	0.192964881	0.658265014
118.9581205	1.837161592	1.073688456	422.5541618	60.12214067	23.2645586	0.192971847	0.658404075
119.0194076	1.837229437	1.073727108	422.6076798	60.12430596	23.26542064	0.192978804	0.65854301
119.0806946	1.837297198	1.073765712	422.6611314	60.12646857	23.2662816	0.192985752	0.658681818
119.1419816	1.837364875	1.073804268	422.7145167	60.1286285	23.26714151	0.192992692	0.658820499
119.2032686	1.837432468	1.073842777	422.7678357	60.13078576	23.26800035	0.192999623	0.658959055
119.2645557	1.837499978	1.073881238	422.8210886	60.13294034	23.26885812	0.193006546	0.659097484
119.3258427	1.837567404	1.073919651	422.8742755	60.13509225	23.26971484	0.193013459	0.659235787
119.3871297	1.837634746	1.073958016	422.9273963	60.13724149	23.27057049	0.193020365	0.659373964
119.4484168	1.837702006	1.073996334	422.9804513	60.13938807	23.27142509	0.193027262	0.659512015
119.5097038	1.837769182	1.074034605	423.0334404	60.14153198	23.27227863	0.19303415	0.65964994
119.5709908	1.837836275	1.074072828	423.0863637	60.14367324	23.27313111	0.19304103	0.65978774
119.6322778	1.837903284	1.074111004	423.1392213	60.14581185	23.27398253	0.193047901	0.659925414
119.6935649	1.837970211	1.074149132	423.1920133	60.1479478	23.2748329	0.193054764	0.660062962
119.7548519	1.838037055	1.074187213	423.2447398	60.1500811	23.27568222	0.193061618	0.660200385
119.8161389	1.838103816	1.074225247	423.2974008	60.15221176	23.27653049	0.193068464	0.660337683
119.8774259	1.838170494	1.074263233	423.3499965	60.15433977	23.2773777	0.193075301	0.660474855
119.938713	1.83823709	1.074301173	423.4025268	60.15646515	23.27822387	0.19308213	0.660611903
120	1.838303604	1.074339065	423.4549919	60.15858789	23.27906899	0.19308895	0.660748825
120.061287	1.838370034	1.074376911	423.5073918	60.16070799	23.27991306	0.193095762	0.660885623
120.1225741	1.838436383	1.074414709	423.5597266	60.16282546	23.28075608	0.193102565	0.661022296
120.1838611	1.838502649	1.074452461	423.6119964	60.16494031	23.28159806	0.19310936	0.661158844
120.2451481	1.838568833	1.074490166	423.6642013	60.16705253	23.282439	0.193116146	0.661295268
120.3064351	1.838634936	1.074527824	423.7163413	60.16916213	23.2832789	0.193122924	0.661431567
120.3677222	1.838700956	1.074565435	423.7684165	60.17126911	23.28411775	0.193129694	0.661567742
120.4290092	1.838766894	1.074602999	423.820427	60.17337347	23.28495556	0.193136455	0.661703792
120.4902962	1.838832751	1.074640517	423.8723728	60.17547522	23.28579234	0.193143208	0.661839719
120.5515832	1.838898526	1.074677988	423.9242541	60.17757436	23.28662808	0.193149952	0.661975521
120.6128703	1.838964219	1.074715413	423.9760709	60.1796709	23.28746278	0.193156688	0.662111199
120.6741573	1.839029831	1.074752791	424.0278232	60.18176483	23.28829644	0.193163416	0.662246754
120.7354443	1.839095361	1.074790123	424.0795112	60.18385616	23.28912907	0.193170135	0.662382185
120.7967314	1.839160811	1.074827409	424.1311349	60.18594489	23.28996067	0.193176846	0.662517492
120.8580184	1.839226179	1.074864648	424.1826944	60.18803102	23.29079124	0.193183549	0.662652676
120.9193054	1.839291465	1.074901841	424.2341898	60.19011457	23.29162078	0.193190243	0.662787736
120.9805924	1.839356671	1.074938987	424.2856211	60.19219552	23.29244929	0.193196929	0.662922673
121.0418795	1.839421796	1.074976088	424.3369884	60.19427389	23.29327676	0.193203607	0.663057487
121.1031665	1.83948684	1.075013142	424.3882918	60.19634967	23.29410322	0.193210276	0.663192177
121.1644535	1.839551803	1.075050151	424.4395314	60.19842287	23.29492864	0.193216938	0.663326745
121.2257406	1.839616686	1.075087113	424.4907072	60.2004935	23.29575304	0.19322359	0.663461189
121.2870276	1.839681488	1.075124029	424.5418192	60.20256155	23.29657642	0.193230235	0.663595511
121.3483146	1.83974621	1.0751609	424.5928676	60.20462703	23.29739878	0.193236871	0.663729711
121.4096016	1.839810851	1.075197724	424.6438525	60.20668994	23.29822011	0.193243499	0.663863787
121.4708887	1.839875412	1.075234503	424.6947739	60.20875028	23.29904043	0.193250119	0.663997741
121.5321757	1.839939893	1.075271236	424.7456318	60.21080806	23.29985972	0.193256731	0.664131573
121.5934627	1.840004293	1.075307923	424.7964264	60.21286328	23.300678	0.193263334	0.664265282
121.6547497	1.840068614	1.075344565	424.8471578	60.21491594	23.30149526	0.193269929	0.664398869
121.7160368	1.840132854	1.075381161	424.8978259	60.21696605	23.3023115	0.193276516	0.664532334
121.7773238	1.840197015	1.075417711	424.9484309	60.2190136	23.30312673	0.193283095	0.664665678
121.8386108	1.840261096	1.075454216	424.9989728	60.22105861	23.30394095	0.193289665	0.664798899
121.8998979	1.840325097	1.075490676	425.0494517	60.22310107	23.30475415	0.193296227	0.664931998
121.9611849	1.840389019	1.07552709	425.0998676	60.22514098	23.30556635	0.193302781	0.665064976
122.0224719	1.840452861	1.075563459	425.1502207	60.22717835	23.30637753	0.193309327	0.665197832
122.0837589	1.840516624	1.075599782	425.200511	60.22921319	23.3071877	0.193315865	0.665330567
122.145046	1.840580308	1.07563606	425.2507386	60.23124549	23.30799687	0.193322395	0.66546318
122.206333	1.840643912	1.075672293	425.3009036	60.23327526	23.30880503	0.193328917	0.665595672
122.26762	1.840707437	1.075708481	425.3510059	60.2353025	23.30961218	0.19333543	0.665728043
122.328907	1.840770883	1.075744624	425.4010458	60.23732721	23.31041833	0.193341935	0.665860293
122.3901941	1.84083425	1.075780721	425.4510231	60.2393494	23.31122348	0.193348432	0.665992422
122.4514811	1.840897538	1.075816774	425.5009381	60.24136906	23.31202762	0.193354921	0.66612443
[truncated: 1,917 more rows]
